# Supplementary material
Source: PubMed Central journal article supplement (PMC3446797)
Supplement: ismej201228x1.pdf [file ismej201228x1.pdf]

**Table S1** Complete list of proteins identified in the metaproteome analyses. Proteins only in summer (red), only in winter (blue), and in both seasons (green). The number of unique peptides and assigned spectra are shown for each protein, using both the NR database and AntComb, in summer (S) or winter (W). At least two unique peptides were required to validate a protein assignment.

| Annotation & function                                                         | Best match of protein                                                                                                                         | Phylogenetic grouping of best match | Unique peptides |   |         |    | Assigned spectra |   |         |     |
|-------------------------------------------------------------------------------|-----------------------------------------------------------------------------------------------------------------------------------------------|-------------------------------------|-----------------|---|---------|----|------------------|---|---------|-----|
|                                                                               |                                                                                                                                               |                                     | NR              |   | AntComb |    | NR               |   | AntComb |     |
|                                                                               |                                                                                                                                               |                                     | S               | W | S       | W  | S                | W | S       | W   |
| <b>BACTERIA &amp; ARCHAEA</b>                                                 |                                                                                                                                               |                                     |                 |   |         |    |                  |   |         |     |
| <b>TRANSPORT</b>                                                              |                                                                                                                                               |                                     |                 |   |         |    |                  |   |         |     |
| <b>Transport – Cell Membrane</b>                                              |                                                                                                                                               |                                     |                 |   |         |    |                  |   |         |     |
| <i>ABC transport system, general amino acids</i>                              |                                                                                                                                               |                                     |                 |   |         |    |                  |   |         |     |
| <b>ABC transport system, general amino acids, periplasmic binding protein</b> | 88% identity to General amino acid ABC transport system, periplasmic binding protein [YhdW] [ <i>Candidatus Pelagibacter ubique</i> HTCC1002] | Alphaproteobacteria (SAR11 cluster) | 0               | 0 | 30      | 25 | 0                | 0 | 161     | 229 |
| <b>ABC transport system, general amino acids, periplasmic binding protein</b> | 82% identity to General amino acid ABC transport system, periplasmic binding protein [YhdW] [ <i>Candidatus Pelagibacter ubique</i> HTCC1002] | Alphaproteobacteria (SAR11 cluster) | 0               | 0 | 7       | 10 | 0                | 0 | 15      | 63  |
| <b>ABC transport system, general amino acids, periplasmic binding protein</b> | 91% identity to General amino acid ABC transport system, periplasmic binding protein [YhdW] [ <i>Candidatus Pelagibacter ubique</i> HTCC1002] | Alphaproteobacteria (SAR11 cluster) | 0               | 0 | 4       | 3  | 0                | 0 | 14      | 44  |
| <b>ABC transport system, general amino acids, periplasmic binding protein</b> | 92% identity to General amino acid ABC transport system, periplasmic binding protein [YhdW] [ <i>Candidatus Pelagibacter ubique</i> HTCC1002] | Alphaproteobacteria (SAR11 cluster) | 0               | 0 | 3       | 5  | 0                | 0 | 15      | 50  |
| <b>ABC transport system, general amino acids, periplasmic binding protein</b> | 92% identity to General amino acid ABC transport system, periplasmic binding protein [YhdW] [ <i>Candidatus Pelagibacter ubique</i>           | Alphaproteobacteria (SAR11 cluster) | 0               | 0 | 2       | 2  | 0                | 0 | 12      | 40  |

|                                                                               |                                                                                                                                                             |                                                                 |   |   |    |    |   |   |    |     |  |
|-------------------------------------------------------------------------------|-------------------------------------------------------------------------------------------------------------------------------------------------------------|-----------------------------------------------------------------|---|---|----|----|---|---|----|-----|--|
|                                                                               | HTCC1002]                                                                                                                                                   |                                                                 |   |   |    |    |   |   |    |     |  |
| <b>ABC transport system, general amino acids, periplasmic binding protein</b> | 88% identity to General amino acid ABC transport system, periplasmic binding protein [YhdW] [ <i>Candidatus Pelagibacter ubique</i> HTCC1002]               | Alphaproteobacteria (SAR11 cluster)                             | 0 | 0 | 3  | 2  | 0 | 0 | 16 | 49  |  |
| <b>ABC transport system, general amino acids, periplasmic binding protein</b> | 83% identity to General amino acid ABC transport system, periplasmic binding protein [YhdW] [ <i>Candidatus Pelagibacter</i> sp. HTCC7211]                  | Alphaproteobacteria (SAR11 cluster)                             | 0 | 0 | 1  | 3  | 0 | 0 | 4  | 19  |  |
| <b>ABC transport system, general amino acids, periplasmic binding protein</b> | 86% identity to General amino acid ABC transport system, periplasmic binding protein [YhdW] [ <i>Candidatus Pelagibacter ubique</i> HTCC1002]               | Alphaproteobacteria (SAR11 cluster)                             | 0 | 0 | 0  | 2  | 0 | 0 | 0  | 20  |  |
| <b>ABC transport system, general amino acids, ATP-binding protein</b>         | 94% identity to General amino acid transport, ATP-binding protein [YhdZ] [ <i>Candidatus Pelagibacter ubique</i> HTCC1062]                                  | Alphaproteobacteria (SAR11 cluster)                             | 2 | 2 | 0  | 0  | 4 | 3 | 0  | 0   |  |
| <b>ABC transport system, general amino acids, periplasmic binding protein</b> | 77% identity to General amino acid ABC transport system, periplasmic binding protein [YhdW] [Rhodobacterales bacterium HTCC2255]                            | Alphaproteobacteria (Rhodobacterales, <i>Roseobacter</i> clade) | 0 | 0 | 6  | 14 | 0 | 0 | 10 | 96  |  |
| <b>ABC transport system, general amino acids, periplasmic binding protein</b> | 100% identity to General amino acid ABC transport system, periplasmic binding protein [YhdW] [ Rhodobacterales bacterium HTCC2255]                          | Alphaproteobacteria (Rhodobacterales, <i>Roseobacter</i> clade) | 0 | 0 | 2  | 0  | 0 | 0 | 7  | 0   |  |
| <b>ABC transport system, general amino acids, periplasmic binding protein</b> | 64% identity to General amino acid ABC transport system, periplasmic binding protein [YhdW] [ <i>Candidatus Puniceispirillum marinum</i> (strain IMCC1322)] | Alphaproteobacteria (SAR116 cluster)                            | 0 | 0 | 2  | 5  | 0 | 0 | 2  | 10  |  |
| <b>ABC transport system, general amino acids, periplasmic binding protein</b> | 61% identity to General amino acid ABC transport system, periplasmic binding protein [YhdW] [ <i>Hoeflea phototrophica</i> DFL-43]                          | Alphaproteobacteria (Rhizobiales)                               | 0 | 0 | 10 | 12 | 0 | 0 | 30 | 192 |  |
| <b>ABC transport system, general amino acids, periplasmic binding protein</b> | 100% identity to General amino acid ABC transport system, periplasmic binding protein [YhdW] [ <i>Psychromonas ingrahamii</i> 37]                           | Gammaproteobacteria (Alteromonadales)                           | 2 | 1 | 0  | 0  | 2 | 1 | 0  | 0   |  |
| <b>ABC transport system, general amino acids, periplasmic binding protein</b> | 100% identity to General amino acid ABC transport system, periplasmic binding protein [YhdW] [ <i>Moritella</i> sp. PE36]                                   | Gammaproteobacteria (Alteromonadales)                           | 3 | 0 | 0  | 0  | 7 | 0 | 0  | 0   |  |
|                                                                               |                                                                                                                                                             |                                                                 |   |   |    |    |   |   |    |     |  |
| <i>ABC transport system, glycine betaine</i>                                  |                                                                                                                                                             |                                                                 |   |   |    |    |   |   |    |     |  |
| <b>ABC transport system, glycine betaine, periplasmic binding protein</b>     | 95% identity to Glycine betaine ABC transport system, periplasmic binding protein [OpuAC] [ <i>Candidatus Pelagibacter ubique</i> HTCC1002]                 | Alphaproteobacteria (SAR11 cluster)                             | 0 | 0 | 10 | 15 | 0 | 0 | 37 | 143 |  |
| <b>ABC transport system, glycine betaine, periplasmic binding protein</b>     | 64% identity to Glycine betaine ABC transport system, periplasmic binding protein [OpuAC] [ <i>Candidatus Pelagibacter ubique</i> HTCC1002]                 | Alphaproteobacteria (SAR11 cluster)                             | 0 | 0 | 3  | 7  | 0 | 0 | 9  | 86  |  |

|                                                                                   |                                                                                                                                                        |                                                                 |   |   |   |   |   |   |    |    |
|-----------------------------------------------------------------------------------|--------------------------------------------------------------------------------------------------------------------------------------------------------|-----------------------------------------------------------------|---|---|---|---|---|---|----|----|
| <b>ABC transport system, glycine betaine, periplasmic binding protein</b>         | 87% identity to Glycine betaine ABC transport system, periplasmic binding protein [OpuAC] [ <i>Candidatus Pelagibacter ubique</i> HTCC1002]            | Alphaproteobacteria (SAR11 cluster)                             | 0 | 0 | 3 | 5 | 0 | 0 | 4  | 29 |
| <b>ABC transport system, glycine betaine, periplasmic binding protein</b>         | 86% identity to Glycine betaine ABC transport system, periplasmic binding protein [OpuAC] [ <i>Candidatus Pelagibacter ubique</i> HTCC1002]            | Alphaproteobacteria (SAR11 cluster)                             | 0 | 0 | 1 | 3 | 0 | 0 | 2  | 26 |
| <b>ABC transport system, glycine betaine, periplasmic binding protein</b>         | 100% identity to Glycine betaine ABC transport system, periplasmic binding protein [OpuAC] [ <i>Candidatus Pelagibacter ubique</i> HTCC1002]           | Alphaproteobacteria (SAR11 cluster)                             | 0 | 0 | 1 | 3 | 0 | 0 | 5  | 10 |
| <b>ABC transport system, glycine betaine, periplasmic binding protein</b>         | 75% identity to Glycine betaine ABC transport system, periplasmic binding protein [OpuAC] [ <i>Candidatus Pelagibacter ubique</i> HTCC1002]            | Alphaproteobacteria (SAR11 cluster)                             | 0 | 0 | 0 | 2 | 0 | 0 | 0  | 19 |
| <b>ABC transport system, glycine betaine, periplasmic binding protein</b>         | 68% identity to Glycine betaine ABC transport system, periplasmic binding protein [OpuAC] [ <i>Candidatus Pelagibacter</i> sp. HTCC7211]               | Alphaproteobacteria (SAR11 cluster)                             | 0 | 0 | 3 | 3 | 0 | 0 | 4  | 18 |
| <b>ABC transport system, glycine betaine, periplasmic binding protein</b>         | 67% identity to Glycine betaine ABC transport system, periplasmic binding protein [OpuAC] [ <i>Candidatus Pelagibacter ubique</i> ]                    | Alphaproteobacteria (SAR11 cluster)                             | 0 | 0 | 4 | 3 | 0 | 0 | 10 | 11 |
| <b>ABC transport system, proline/glycine betaine, periplasmic binding protein</b> | 94% identity to Proline/glycine betaine ABC transport system, periplasmic binding protein [ProX] [ <i>Candidatus Pelagibacter</i> sp. HTCC7211]        | Alphaproteobacteria (SAR11 cluster)                             | 0 | 0 | 3 | 3 | 0 | 0 | 4  | 8  |
| <b>ABC transport system, proline/glycine betaine, periplasmic binding protein</b> | 96% identity to Proline/glycine betaine ABC transport system, periplasmic binding protein [ProX] [ <i>Candidatus Pelagibacter</i> sp. HTCC7211]        | Alphaproteobacteria (SAR11 cluster)                             | 0 | 0 | 3 | 7 | 0 | 0 | 7  | 16 |
| <b>ABC transport system, proline/glycine betaine, periplasmic binding protein</b> | 78% identity to Proline/glycine betaine ABC transport system, periplasmic binding protein [ProX] [ <i>Candidatus Pelagibacter</i> sp. HTCC7211]        | Alphaproteobacteria (SAR11 cluster)                             | 0 | 0 | 0 | 2 | 0 | 0 | 0  | 5  |
| <b>ABC transport system, proline/glycine betaine, periplasmic binding protein</b> | 60% identity to Proline/glycine betaine ABC transport system, periplasmic binding protein [ProX] [Rhodobacterales bacterium HTCC2255]                  | Alphaproteobacteria (Rhodobacterales, <i>Roseobacter</i> clade) | 0 | 0 | 2 | 3 | 0 | 0 | 18 | 27 |
| <b>ABC transport system, proline/glycine betaine, periplasmic binding protein</b> | 35% identity to Proline/glycine betaine ABC transport system, periplasmic binding protein [ProX] [ <i>Pseudovibrio</i> sp. JE062]                      | Alphaproteobacteria (Rhodobacterales)                           | 0 | 0 | 2 | 6 | 0 | 0 | 5  | 35 |
| <b>ABC transport system, proline/glycine betaine, periplasmic binding protein</b> | 83% identity Proline/glycine betaine ABC transport system, periplasmic binding protein [ProX] [Rhodobacterales bacterium HTCC2255]                     | Alphaproteobacteria (Rhodobacterales, <i>Roseobacter</i> clade) | 0 | 0 | 1 | 2 | 0 | 0 | 5  | 18 |
| <b>ABC transport system, proline/glycine betaine, periplasmic binding protein</b> | 54% identity to Proline/glycine betaine ABC transport system, periplasmic binding protein [ProX] [Rhodobacterales bacterium HTCC2255]                  | Alphaproteobacteria (Rhodobacterales, <i>Roseobacter</i> clade) | 0 | 0 | 0 | 3 | 0 | 0 | 0  | 17 |
| <b>ABC transport system, proline/glycine betaine, periplasmic binding protein</b> | 34% identity to Proline/glycine betaine ABC transport system, periplasmic binding protein [ProX] [ <i>Pseudovibrio</i> sp. JE062]                      | Alphaproteobacteria (Rhodobacterales)                           | 0 | 0 | 0 | 3 | 0 | 0 | 0  | 13 |
| <b>ABC transport system, proline/glycine betaine, periplasmic binding protein</b> | 48% identity to Proline/glycine betaine ABC transport system, periplasmic binding protein [ProX] [ <i>Shewanella frigidimarina</i> (strain NCIMB 400)] | Gammaproteobacteria (Alteromonadales)                           | 0 | 0 | 0 | 2 | 0 | 0 | 0  | 3  |

|                                                                                      |                                                                                                                                            |                                                                 |   |   |    |    |   |   |    |    |
|--------------------------------------------------------------------------------------|--------------------------------------------------------------------------------------------------------------------------------------------|-----------------------------------------------------------------|---|---|----|----|---|---|----|----|
| <b>ABC transport system, proline/glycine betaine, periplasmic binding protein</b>    | 45% identity to Proline/glycine betaine ABC transport system, periplasmic binding protein [ProX] [ <i>Desulfovibrio aespoensis</i> Aspo-2] | Deltaproteobacteria (Desulfovibrionales)                        | 0 | 0 | 0  | 3  | 0 | 0 | 0  | 5  |
| <b>ABC transport system, branched chain amino acids</b>                              |                                                                                                                                            |                                                                 |   |   |    |    |   |   |    |    |
| <b>ABC transport system, branched-chain amino acids, periplasmic binding protein</b> | 96% identity to Leu/Ile/Val ABC transport system, periplasmic binding protein [LivJ] [ <i>Candidatus Pelagibacter ubique</i> HTCC1002]     | Alphaproteobacteria (SAR11 cluster)                             | 0 | 0 | 14 | 18 | 0 | 0 | 34 | 81 |
| <b>ABC transport system, branched-chain amino acids, periplasmic binding protein</b> | 87% identity to Leu/Ile/Val ABC transport system, periplasmic binding protein [LivJ] [ <i>Candidatus Pelagibacter ubique</i> HTCC1002]     | Alphaproteobacteria (SAR11 cluster)                             | 0 | 0 | 2  | 5  | 0 | 0 | 2  | 19 |
| <b>ABC transport system, branched-chain amino acids, periplasmic binding protein</b> | 97% identity to Leu/Ile/Val ABC transport system, periplasmic binding protein [LivJ] [ <i>Candidatus Pelagibacter ubique</i> HTCC1002]     | Alphaproteobacteria (SAR11 cluster)                             | 0 | 0 | 0  | 2  | 0 | 0 | 0  | 2  |
| <b>ABC transport system, branched-chain amino acids, periplasmic binding protein</b> | 96% identity to Leu/Ile/Val ABC transport system, periplasmic binding protein [BraC] [ <i>Candidatus Pelagibacter ubique</i> HTCC1062]     | Alphaproteobacteria (SAR11 cluster)                             | 1 | 3 | 0  | 0  | 1 | 3 | 0  | 0  |
| <b>ABC transport system, branched-chain amino acids, periplasmic binding protein</b> | 82% identity to Leu/Ile/Val ABC transport system, periplasmic binding protein [LivJ] [ <i>Candidatus Pelagibacter ubique</i> HTCC1062]     | Alphaproteobacteria (SAR11 cluster)                             | 0 | 0 | 1  | 4  | 0 | 0 | 1  | 5  |
| <b>ABC transport system, branched-chain amino acids, periplasmic binding protein</b> | 68% identity to Leu/Ile/Val ABC transport system, periplasmic binding protein [LivJ] [ <i>Candidatus Pelagibacter</i> sp. HTCC7211]        | Alphaproteobacteria (SAR11 cluster)                             | 0 | 0 | 1  | 4  | 0 | 0 | 1  | 6  |
| <b>ABC transport system, branched-chain amino acids, periplasmic binding protein</b> | 84% identity to Leu/Ile/Val ABC transport system, periplasmic binding protein [LivJ] [ <i>Candidatus Pelagibacter</i> sp. HTCC7211]        | Alphaproteobacteria (SAR11 cluster)                             | 0 | 0 | 7  | 10 | 0 | 0 | 21 | 42 |
| <b>ABC transport system, branched-chain amino acids, periplasmic binding protein</b> | 69% identity to Leu/Ile/Val ABC transport system, periplasmic binding protein [LivJ] [ <i>Pseudovibrio</i> sp. JE062]                      | Alphaproteobacteria (Rhodobacterales)                           | 0 | 0 | 4  | 10 | 0 | 0 | 8  | 38 |
| <b>ABC transport system, branched-chain amino acids, periplasmic binding protein</b> | 62% identity to Leu/Ile/Val ABC transport system, periplasmic binding protein [LivJ] [uncultured <i>Roseobacter</i> sp]                    | Alphaproteobacteria (Rhodobacterales, <i>Roseobacter</i> clade) | 0 | 0 | 1  | 7  | 0 | 0 | 2  | 18 |
| <b>ABC transport system, branched-chain amino acids, periplasmic binding protein</b> | 100% identity to Leu/Ile/Val ABC transport system, periplasmic binding protein [LivJ] [ <i>Sulfitobacter</i> sp. EE-36]                    | Alphaproteobacteria (Rhodobacterales, <i>Roseobacter</i> clade) | 2 | 2 | 2  | 2  | 5 | 3 | 2  | 8  |
| <b>ABC transport system, branched-chain amino acids, periplasmic binding protein</b> | 78% identity to Leu/Ile/Val ABC transport system, periplasmic binding protein [LivJ] [uncultured <i>Roseobacter</i> sp]                    | Alphaproteobacteria (Rhodobacterales, <i>Roseobacter</i> clade) | 0 | 0 | 4  | 4  | 0 | 0 | 9  | 6  |
| <b>ABC transport system, branched-chain amino acids, periplasmic binding protein</b> | 70% identity to Leu/Ile/Val ABC transport system, periplasmic binding protein [LivJ] [uncultured <i>Roseobacter</i> sp]                    | Alphaproteobacteria (Rhodobacterales, <i>Roseobacter</i> clade) | 0 | 0 | 1  | 4  | 0 | 0 | 1  | 10 |
| <b>ABC transport system, branched-chain amino acids, periplasmic binding protein</b> | 64% identity to Leu/Ile/Val ABC transport system, periplasmic binding protein [LivJ] [Rhodobacterales bacterium HTCC2150]                  | Alphaproteobacteria (Rhodobacterales, <i>Roseobacter</i> clade) | 0 | 0 | 6  | 6  | 0 | 0 | 33 | 37 |
| <b>ABC transport system, branched-chain amino acids, periplasmic binding protein</b> | 48% identity to Leu/Ile/Val ABC transport system, periplasmic binding protein [LivJ]                                                       | Alphaproteobacteria (Rhodobacterales,                           | 0 | 0 | 0  | 4  | 0 | 0 | 0  | 37 |



|                                                                                         |                                                                                                                                                         |                                                                 |   |   |    |    |    |   |    |    |
|-----------------------------------------------------------------------------------------|---------------------------------------------------------------------------------------------------------------------------------------------------------|-----------------------------------------------------------------|---|---|----|----|----|---|----|----|
| <b>ABC transport system, octopine, periplasmic binding protein</b>                      | 90% identity to Octopine ABC transport system, periplasmic binding protein [OccT] [ <i>Candidatus Pelagibacter ubique</i> HTCC1062]                     | Alphaproteobacteria (SAR11 cluster)                             | 5 | 1 | 0  | 0  | 15 | 3 | 0  | 0  |
| <i>ABC transport system, taurine</i>                                                    |                                                                                                                                                         |                                                                 |   |   |    |    |    |   |    |    |
| <b>ABC transport system, taurine, periplasmic binding protein</b>                       | 92% identity to Taurine ABC transport system, periplasmic binding protein [TauA] [ <i>Candidatus Pelagibacter ubique</i> HTCC1002]                      | Alphaproteobacteria (SAR11 cluster)                             | 0 | 0 | 17 | 16 | 0  | 0 | 85 | 78 |
| <b>ABC transport system, taurine, periplasmic binding protein</b>                       | 62% identity to Taurine ABC transport system, periplasmic binding protein [TauA] [ <i>Candidatus Pelagibacter ubique</i> HTCC1062]                      | Alphaproteobacteria (SAR11 cluster)                             | 0 | 0 | 6  | 10 | 0  | 0 | 25 | 48 |
| <b>ABC transport system, taurine, periplasmic binding protein</b>                       | 58% identity to Taurine ABC transport system, periplasmic binding protein [TauA] [ <i>Candidatus Pelagibacter ubique</i> HTCC1062]                      | Alphaproteobacteria (SAR11 cluster)                             | 0 | 0 | 1  | 8  | 0  | 0 | 1  | 25 |
| <b>ABC transport system, taurine, periplasmic binding protein</b>                       | 61% identity to Taurine ABC transport system, periplasmic binding protein [TauA] [ <i>Candidatus Pelagibacter ubique</i> HTCC1062]                      | Alphaproteobacteria (SAR11 cluster)                             | 0 | 0 | 1  | 2  | 0  | 0 | 4  | 10 |
| <b>ABC transport system, taurine, periplasmic binding protein</b>                       | 70% identity to Taurine ABC transport system, periplasmic binding protein [TauA] [ <i>Ruegeria pomeroyi</i> ]                                           | Alphaproteobacteria (Rhodobacterales, <i>Roseobacter</i> clade) | 0 | 0 | 1  | 5  | 0  | 0 | 2  | 52 |
| <i>ABC transport system, sulfonate/nitrate/bicarbonate</i>                              |                                                                                                                                                         |                                                                 |   |   |    |    |    |   |    |    |
| <b>ABC transport system, sulfonate/nitrate/bicarbonate, periplasmic binding protein</b> | 73% identity to Sulfonate/nitrate/bicarbonate transport system, periplasmic binding protein [TauA] [ <i>Phaeobacter gallaeciensis</i> BS107]            | Alphaproteobacteria (Rhodobacterales)                           | 0 | 0 | 0  | 2  | 0  | 0 | 0  | 2  |
| <b>ABC transport system, sulfonate/nitrate/bicarbonate, periplasmic binding protein</b> | 74% identity to Sulfonate/nitrate/bicarbonate transport system periplasmic binding protein [TauA] [ <i>Methylibium petroleiphilum</i> (strain PM1)]     | Betaproteobacteria (Burkholderiales)                            | 0 | 0 | 3  | 0  | 0  | 0 | 9  | 0  |
| <b>ABC transport system, sulfonate/nitrate/bicarbonate, periplasmic binding protein</b> | 47% identity to Sulfonate/nitrate/bicarbonate transport system periplasmic binding protein [TauA] [ <i>Methylibium petroleiphilum</i> (strain PM1)]     | Betaproteobacteria (Burkholderiales)                            | 0 | 0 | 2  | 4  | 0  | 0 | 3  | 17 |
| <b>ABC transport system, sulfonate/nitrate/bicarbonate, periplasmic binding protein</b> | 64% identity to Sulfonate/nitrate/bicarbonate transport system, periplasmic binding protein [TauA] [ <i>Methylibium petroleiphilum</i> (strain PM1)]    | Betaproteobacteria (Burkholderiales)                            | 0 | 0 | 3  | 3  | 0  | 0 | 5  | 6  |
| <b>ABC transport system, sulfonate/nitrate/bicarbonate, periplasmic binding protein</b> | 31% identity to Putative sulfonate/nitrate/bicarbonate transport system, periplasmic binding protein [TauA] [ <i>Verminephrobacter eiseniae</i> EF01-2] | Betaproteobacteria (Burkholderiales)                            | 0 | 0 | 4  | 2  | 0  | 0 | 8  | 2  |
| <b>ABC transport system, sulfonate/nitrate/bicarbonate, ATP-binding protein</b>         | 74% identity to Sulfonate/nitrate/bicarbonate transport system, ATPase protein [TauB] [ <i>Methylibium petroleiphilum</i> PM1]                          | Betaproteobacteria (Burkholderiales)                            | 0 | 0 | 4  | 5  | 0  | 0 | 8  | 25 |

|                                                                                 |                                                                                                                                                   |                                                                 |   |   |   |   |    |    |    |    |  |
|---------------------------------------------------------------------------------|---------------------------------------------------------------------------------------------------------------------------------------------------|-----------------------------------------------------------------|---|---|---|---|----|----|----|----|--|
|                                                                                 |                                                                                                                                                   |                                                                 |   |   |   |   |    |    |    |    |  |
| <i>ABC transport system, spermidine/putrescine</i>                              |                                                                                                                                                   |                                                                 |   |   |   |   |    |    |    |    |  |
| <b>ABC transport system, spermidine/putrescine, periplasmic binding protein</b> | 90% identity to Spermidine/putrescine ABC transport system, periplasmic binding protein [PotD] [ <i>Candidatus Pelagibacter ubique</i> HTCC1062]  | Alphaproteobacteria (SAR11 cluster)                             | 0 | 0 | 0 | 4 | 0  | 0  | 0  | 16 |  |
| <b>ABC transport system, spermidine/putrescine, periplasmic binding protein</b> | 65% identity to Spermidine/putrescine ABC transport system, periplasmic binding protein [PotD] [ <i>Candidatus Pelagibacter ubique</i> HTCC1002]  | Alphaproteobacteria (SAR11 cluster)                             | 0 | 0 | 5 | 6 | 0  | 0  | 10 | 36 |  |
| <b>ABC transport system, spermidine/putrescine, periplasmic binding protein</b> | 72% identity to Spermidine/putrescine ABC transport system, periplasmic binding protein [PotD] [ <i>Candidatus Pelagibacter ubique</i> HTCC1002]  | Alphaproteobacteria (SAR11 cluster)                             | 0 | 0 | 3 | 5 | 0  | 0  | 8  | 24 |  |
| <b>ABC transport system, spermidine/putrescine, periplasmic binding protein</b> | 96% identity to Spermidine/putrescine ABC transport system, periplasmic binding protein [PotD] [ <i>Candidatus Pelagibacter ubique</i> HTCC1002]  | Alphaproteobacteria (SAR11 cluster)                             | 0 | 0 | 0 | 4 | 0  | 0  | 0  | 9  |  |
| <b>ABC transport system, spermidine/putrescine, periplasmic binding protein</b> | 80% identity to Spermidine/putrescine ABC transport system, periplasmic binding protein [PotD] [ <i>Candidatus Pelagibacter ubique</i> HTCC1062]  | Alphaproteobacteria (SAR11 cluster)                             | 0 | 0 | 2 | 2 | 0  | 0  | 7  | 12 |  |
| <b>ABC transport system, spermidine/putrescine, periplasmic binding protein</b> | 78% identity to Spermidine/putrescine ABC transport system, periplasmic binding protein [PotD] [ <i>Candidatus Pelagibacter ubique</i> HTCC1002]  | Alphaproteobacteria (SAR11 cluster)                             | 0 | 0 | 3 | 3 | 0  | 0  | 3  | 21 |  |
| <b>ABC transport system, spermidine/putrescine, periplasmic binding protein</b> | 100% identity to Spermidine/putrescine ABC transport system, periplasmic binding protein [PotD] [ <i>Candidatus Pelagibacter ubique</i> HTCC1002] | Alphaproteobacteria (SAR11 cluster)                             | 2 | 3 | 0 | 0 | 10 | 18 | 0  | 0  |  |
| <b>ABC transport system, spermidine/putrescine, periplasmic binding protein</b> | 50% identity to Spermidine/putrescine ABC transport system, periplasmic binding protein [PotD] [ <i>Candidatus Pelagibacter</i> sp. HTCC7211]     | Alphaproteobacteria (SAR11 cluster)                             | 0 | 0 | 0 | 2 | 0  | 0  | 0  | 4  |  |
| <b>ABC transport system, spermidine/putrescine, periplasmic binding protein</b> | 84% identity to Spermidine/putrescine ABC transport system, periplasmic binding protein [PotD] [ <i>Candidatus Pelagibacter ubique</i> HTCC1002]  | Alphaproteobacteria (SAR11 cluster)                             | 0 | 0 | 2 | 2 | 0  | 0  | 5  | 10 |  |
| <b>ABC transport system, spermidine/putrescine, ATP-binding protein</b>         | 88% identity to Spermidine/putrescine ABC transport system, ATPase subunit [PotA] [ <i>Roseovarius</i> sp. 217]                                   | Alphaproteobacteria (Rhodobacterales, <i>Roseobacter</i> clade) | 0 | 0 | 2 | 0 | 0  | 0  | 2  | 0  |  |
| <b>ABC transport system, spermidine/putrescine, periplasmic binding protein</b> | 75% identity to Spermidine/putrescine ABC transport system, periplasmic binding protein [PotD] [ <i>Roseobacter</i> sp. SK209-2-6]                | Alphaproteobacteria (Rhodobacterales, <i>Roseobacter</i> clade) | 0 | 0 | 3 | 5 | 0  | 0  | 17 | 18 |  |
| <b>ABC transport system, spermidine/putrescine, periplasmic binding protein</b> | 50% identity to Spermidine/putrescine ABC transport system, periplasmic binding protein [PotD] [ <i>Roseobacter</i> sp. MED193]                   | Alphaproteobacteria (Rhodobacterales, <i>Roseobacter</i> clade) | 0 | 0 | 1 | 3 | 0  | 0  | 2  | 13 |  |

|                                                                                 |                                                                                                                                                                |                                                                 |   |   |   |    |   |   |    |    |
|---------------------------------------------------------------------------------|----------------------------------------------------------------------------------------------------------------------------------------------------------------|-----------------------------------------------------------------|---|---|---|----|---|---|----|----|
| <b>ABC transport system, spermidine/putrescine, periplasmic binding protein</b> | 58% identity to Spermidine/putrescine ABC transport system, periplasmic binding protein [PotF] [ <i>Ruegeria</i> sp. R11]                                      | Alphaproteobacteria (Rhodobacterales, <i>Roseobacter</i> clade) | 0 | 0 | 2 | 5  | 0 | 0 | 4  | 17 |
| <b>ABC transport system, spermidine/putrescine, periplasmic binding protein</b> | 49% identity to Spermidine/putrescine ABC transport system, periplasmic binding protein [PotD] [Rhodobacterales bacterium HTCC2150]                            | Alphaproteobacteria (Rhodobacterales, <i>Roseobacter</i> clade) | 0 | 0 | 2 | 3  | 0 | 0 | 8  | 32 |
| <b>ABC transport system, spermidine/putrescine, periplasmic binding protein</b> | 64% identity to Spermidine/putrescine ABC transport system, periplasmic binding protein [PotD] [ <i>Octadecabacter antarcticus</i> 238]                        | Alphaproteobacteria (Rhodobacterales, <i>Roseobacter</i> clade) | 0 | 0 | 0 | 2  | 0 | 0 | 0  | 4  |
| <b>ABC transport system, spermidine/putrescine, periplasmic binding protein</b> | 49% identity to Spermidine/putrescine ABC transport system, periplasmic binding protein [PotD] [ <i>Silicibacter lacuscaerulensis</i> ITI-1157]                | Alphaproteobacteria (Rhodobacterales, <i>Roseobacter</i> clade) | 0 | 0 | 4 | 3  | 0 | 0 | 10 | 10 |
| <b>ABC transport system, spermidine/putrescine, periplasmic binding protein</b> | 85% identity to Spermidine/putrescine ABC transport system, periplasmic binding protein [PotD] [ <i>Candidatus</i> Puniceispirillum marinum (strain IMCC1322)] | Alphaproteobacteria (SAR116 cluster)                            | 0 | 0 | 1 | 2  | 0 | 0 | 1  | 5  |
| <b>ABC transport system, spermidine/putrescine, ATP-binding protein</b>         | 70% identity to Spermidine/putrescine ABC transport system, ATPase subunit [PotA] [Rhodobacterales bacterium HTCC2255]                                         | Alphaproteobacteria (Rhodobacterales, <i>Roseobacter</i> clade) | 0 | 0 | 0 | 2  | 0 | 0 | 0  | 3  |
|                                                                                 |                                                                                                                                                                |                                                                 |   |   |   |    |   |   |    |    |
| <i>ABC transport system, sorbitol/mannitol</i>                                  |                                                                                                                                                                |                                                                 |   |   |   |    |   |   |    |    |
| <b>ABC transport system, sorbitol/mannitol, ATP-binding protein</b>             | 61% identity to Sorbitol/mannitol ABC transport system, ATP-binding subunit [MtkK] [ <i>Pseudovibrio</i> sp. JE062]                                            | Alphaproteobacteria (Rhodobacterales)                           | 0 | 0 | 0 | 2  | 0 | 0 | 0  | 3  |
| <b>ABC transport system, sorbitol/mannitol, periplasmic binding protein</b>     | 78% identity to Sorbitol/mannitol ABC transport system, periplasmic binding protein [ <i>Hoeflea phototrophica</i> DFL-43]                                     | Alphaproteobacteria (Rhizobiales)                               | 0 | 0 | 5 | 5  | 0 | 0 | 7  | 15 |
| <b>ABC transport system, sorbitol/mannitol, periplasmic binding protein</b>     | 50% identity to Sorbitol/mannitol ABC transport system, periplasmic binding protein [ <i>Marinomonas</i> sp. MED121]                                           | Gammaproteobacteria (Oceanospirillales)                         | 0 | 0 | 0 | 2  | 0 | 0 | 0  | 14 |
|                                                                                 |                                                                                                                                                                |                                                                 |   |   |   |    |   |   |    |    |
| <i>ABC transport system, sugar</i>                                              |                                                                                                                                                                |                                                                 |   |   |   |    |   |   |    |    |
| <b>ABC transport system, sugar, periplasmic binding protein</b>                 | 89% identity to Probable sugar ABC transport system, periplasmic binding protein [ <i>Candidatus</i> Pelagibacter sp. HTCC7211]                                | Alphaproteobacteria (SAR11 cluster)                             | 0 | 0 | 9 | 15 | 0 | 0 | 16 | 52 |
| <b>ABC transport system, sugar, periplasmic binding protein</b>                 | 100% identity to Probable sugar ABC transport system, periplasmic binding protein [ <i>Candidatus</i> Pelagibacter ubique HTCC1062]                            | Alphaproteobacteria (SAR11 cluster)                             | 5 | 2 | 0 | 0  | 9 | 3 | 0  | 0  |
| <b>ABC transport system, sugar, periplasmic binding protein</b>                 | 100% identity to Probable sugar ABC transport system, periplasmic binding protein [ <i>Candidatus</i> Pelagibacter sp. HTCC7211]                               | Alphaproteobacteria (SAR11 cluster)                             | 0 | 2 | 0 | 0  | 0 | 3 | 0  | 0  |
| <b>ABC transport system, sugar, periplasmic binding protein</b>                 | 100% identity to Probable sugar ABC transport system, periplasmic binding protein [ <i>Candidatus</i> Pelagibacter sp. HTCC7211]                               | Alphaproteobacteria (SAR11 cluster)                             | 1 | 2 | 0 | 0  | 3 | 5 | 0  | 0  |



|                                                                 |                                                                                                                                                       |                                                                 |   |   |   |    |   |   |    |     |
|-----------------------------------------------------------------|-------------------------------------------------------------------------------------------------------------------------------------------------------|-----------------------------------------------------------------|---|---|---|----|---|---|----|-----|
| <b>ABC transport system, sugar, periplasmic binding protein</b> | 100% identity to Probable sugar ABC transport system, periplasmic binding protein [ <i>Candidatus Pelagibacter ubique</i> HTCC1002]                   | Alphaproteobacteria (SAR11 cluster)                             | 0 | 0 | 3 | 1  | 0 | 0 | 5  | 4   |
| <b>ABC transport system, sugar, periplasmic binding protein</b> | 97% identity to Probable sugar ABC transport system, periplasmic binding protein [ <i>Candidatus Pelagibacter ubique</i> HTCC1062]                    | Alphaproteobacteria (SAR11 cluster)                             | 0 | 0 | 2 | 1  | 0 | 0 | 5  | 3   |
| <b>ABC transport system, sugar, periplasmic binding protein</b> | 63% identity to Probable sugar ABC transport system, periplasmic binding protein [ <i>Octadecabacter antarcticus</i> 307]                             | Alphaproteobacteria (Rhodobacterales, <i>Roseobacter</i> clade) | 0 | 0 | 3 | 8  | 0 | 0 | 5  | 123 |
| <b>ABC transport system, sugar, periplasmic binding protein</b> | 74% identity to Probable sugar ABC transport system, periplasmic binding protein [Rhodobacterales bacterium HTCC2255]                                 | Alphaproteobacteria (Rhodobacterales, <i>Roseobacter</i> clade) | 0 | 0 | 3 | 11 | 0 | 0 | 3  | 35  |
| <b>ABC transport system, sugar, periplasmic binding protein</b> | 63% identity to Probable sugar ABC transport system, periplasmic binding protein [ <i>Jannaschia</i> sp. (strain CCS1)]                               | Alphaproteobacteria (Rhodobacterales, <i>Roseobacter</i> clade) | 0 | 0 | 0 | 5  | 0 | 0 | 0  | 12  |
| <b>ABC transport system, sugar, periplasmic binding protein</b> | 48% identity to Probable sugar ABC transport system, periplasmic binding protein [Rhodobacterales bacterium HTCC2255]                                 | Alphaproteobacteria (Rhodobacterales, <i>Roseobacter</i> clade) | 0 | 0 | 0 | 2  | 0 | 0 | 0  | 4   |
| <b>ABC transport system, sugar, periplasmic binding protein</b> | 100% identity to Sugar ABC transport system, periplasmic binding protein [MalK] [Rhodobacterales bacterium HTCC2255]                                  | Alphaproteobacteria (Rhodobacterales, <i>Roseobacter</i> clade) | 2 | 0 | 0 | 0  | 6 | 0 | 0  | 0   |
| <b>ABC transport system, sugar, periplasmic binding protein</b> | 100% identity to Sugar ABC transport system, periplasmic binding protein [MalK] [ <i>Labrenzia aggregata</i> IAM 12614]                               | Alphaproteobacteria (Rhodobacterales)                           | 0 | 3 | 0 | 0  | 0 | 8 | 0  | 0   |
| <b>ABC transport system, sugar, periplasmic binding protein</b> | 100% identity to Probable sugar ABC transport system, periplasmic binding protein [alpha proteobacterium HTCC2255]                                    | Alphaproteobacteria (Rhodobacterales, <i>Roseobacter</i> clade) | 1 | 1 | 2 | 1  | 1 | 3 | 3  | 4   |
| <b>ABC transport system, sugar, periplasmic binding protein</b> | 83% identity to Probable sugar ABC transport system, periplasmic binding protein [ <i>Roseobacter denitrificans</i> (strain ATCC 33942 / OCh 114)]    | Alphaproteobacteria (Rhodobacterales, <i>Roseobacter</i> clade) | 0 | 0 | 3 | 1  | 0 | 0 | 10 | 1   |
| <b>ABC transport system, sugar, periplasmic binding protein</b> | 88% identity to Sugar ABC transport system, periplasmic binding protein [MalK] [ <i>Ruegeria pomeroyi</i> DSS-3]                                      | Alphaproteobacteria (Rhodobacterales, <i>Roseobacter</i> clade) | 0 | 0 | 0 | 2  | 0 | 0 | 0  | 5   |
| <b>ABC transport system, sugar, periplasmic binding protein</b> | 65% identity to Probable sugar ABC transport system, periplasmic binding protein [ <i>Phaeobacter gallaeciensis</i> 2.10]                             | Alphaproteobacteria (Rhodobacterales)                           | 0 | 0 | 0 | 3  | 0 | 0 | 0  | 17  |
| <b>ABC transport system, sugar, periplasmic binding protein</b> | 48% identity to Sugar ABC transport system, periplasmic binding protein [MalK] [ <i>Roseobacter</i> sp. SK209-2-6]                                    | Alphaproteobacteria (Rhodobacterales, <i>Roseobacter</i> clade) | 0 | 0 | 0 | 2  | 0 | 0 | 0  | 13  |
| <b>ABC transport system, sugar, periplasmic binding protein</b> | 79% identity to Sugar ABC transport system, periplasmic binding protein [MalK] [ <i>Stappia aggregata</i> IAM 12614]                                  | Alphaproteobacteria (Rhodobacterales)                           | 0 | 0 | 2 | 5  | 0 | 0 | 3  | 26  |
| <b>ABC transport system, sugar, periplasmic binding protein</b> | 76% identity to Sugar ABC transport system periplasmic sugar-binding protein [MalK] [ <i>Candidatus Candidatus Puniceispirillum marinum</i> IMCC1322] | Alphaproteobacteria (SAR116 cluster)                            | 0 | 0 | 3 | 3  | 0 | 0 | 12 | 8   |

|                                                                        |                                                                                                                                                  |                                         |   |   |    |    |   |   |    |    |
|------------------------------------------------------------------------|--------------------------------------------------------------------------------------------------------------------------------------------------|-----------------------------------------|---|---|----|----|---|---|----|----|
| <b>ABC transport system, sugar, periplasmic binding protein</b>        | 50% identity to Probable sugar ABC transport system, periplasmic binding protein [ <i>Rhizobium etli</i> (strain CFN 42 / ATCC 51251)]           | Alphaproteobacteria (Rhizobiales)       | 0 | 0 | 0  | 12 | 0 | 0 | 0  | 52 |
| <b>ABC transport system, sugar, periplasmic binding protein</b>        | 67% identity to Probable sugar ABC transport system, periplasmic binding protein [ <i>Hoeflea phototrophica</i> DFL-43]                          | Alphaproteobacteria (Rhizobiales)       | 0 | 0 | 0  | 3  | 0 | 0 | 0  | 9  |
| <b>ABC transport system, sugar, periplasmic binding protein</b>        | 68% identity to Probable sugar ABC transport system, periplasmic binding protein [HCH_02309] [ <i>Hahella chejuensis</i> (strain KCTC 2396)]     | Gammaproteobacteria (Oceanospirillales) | 0 | 0 | 3  | 3  | 0 | 0 | 6  | 8  |
| <b>ABC transport system, sugar, periplasmic binding protein</b>        | 65% identity to Probable sugar ABC transport system, periplasmic binding protein [ <i>Hahella chejuensis</i> (strain KCTC 2396)]                 | Gammaproteobacteria (Oceanospirillales) | 0 | 0 | 0  | 4  | 0 | 0 | 0  | 9  |
| <b>ABC transport system, sugar, periplasmic binding protein</b>        | 61% identity to Probable sugar ABC transport system, periplasmic binding protein [ <i>Hahella chejuensis</i> (strain KCTC 2396)]                 | Gammaproteobacteria (Oceanospirillales) | 0 | 0 | 0  | 2  | 0 | 0 | 0  | 4  |
| <b>ABC transport system, sugar, periplasmic binding protein</b>        | 64% identity to Probable sugar ABC transport system, periplasmic binding protein [ <i>Marinomonas</i> sp. (strain MWYL1)]                        | Gammaproteobacteria (Oceanospirillales) | 0 | 0 | 0  | 2  | 0 | 0 | 0  | 3  |
| <b>ABC transport system, sugar, periplasmic binding protein</b>        | 49% identity to Probable sugar ABC transport system, periplasmic binding protein [ <i>Acidothermus cellulolyticus</i> (strain ATCC 43068 / 11B)] | Actinobacteria                          | 0 | 0 | 4  | 3  | 0 | 0 | 10 | 6  |
|                                                                        |                                                                                                                                                  |                                         |   |   |    |    |   |   |    |    |
| <i>ABC transport system, ribose</i>                                    |                                                                                                                                                  |                                         |   |   |    |    |   |   |    |    |
| <b>ABC transport system, ribose, periplasmic binding protein</b>       | 50% identity to Ribose ABC transport system, periplasmic binding protein [RbsB] [ <i>Rhizobium etli</i> (strain CFN 42 / ATCC 51251)]            | Alphaproteobacteria (Rhizobiales)       | 0 | 0 | 4  | 5  | 0 | 0 | 4  | 22 |
| <b>ABC transport system, ribose, periplasmic binding protein</b>       | 45% identity to Ribose ABC transport system, periplasmic binding protein [RbsB] [ <i>Rhizobium</i> sp. (strain NGR234)]                          | Alphaproteobacteria (Rhizobiales)       | 0 | 0 | 3  | 3  | 0 | 0 | 5  | 13 |
| <b>ABC transport system, ribose, periplasmic binding protein</b>       | 59% identity to Ribose ABC transport system, periplasmic binding protein [RbsB] [ <i>Rhizobium etli</i> (strain CFN 42 / ATCC 51251)]            | Alphaproteobacteria (Rhizobiales)       | 0 | 0 | 0  | 2  | 0 | 0 | 0  | 6  |
| <b>ABC transport system, ribose, periplasmic binding protein</b>       | 90% identity to Ribose ABC transport system, periplasmic binding protein [RbsB] [ <i>Escherichia coli</i> O6] ( <i>likely contaminant</i> )      | Gammaproteobacteria (Enterobacteriales) | 0 | 2 | 0  | 0  | 0 | 4 | 0  | 0  |
|                                                                        |                                                                                                                                                  |                                         |   |   |    |    |   |   |    |    |
| <i>ABC transport system, oligopeptide</i>                              |                                                                                                                                                  |                                         |   |   |    |    |   |   |    |    |
| <b>ABC transport system, oligopeptide, periplasmic binding protein</b> | 57% identity to Probable oligopeptide ABC transport system, periplasmic binding protein [OppA] [ <i>Candidatus Pelagibacter</i> sp. HTCC7211]    | Alphaproteobacteria (SAR11 cluster)     | 0 | 0 | 0  | 16 | 0 | 0 | 0  | 44 |
| <b>ABC transport system, oligopeptide, periplasmic binding protein</b> | 67% identity to Oligopeptide ABC transport system, periplasmic binding protein [OppA]                                                            | Alphaproteobacteria (Rhodobacterales),  | 0 | 0 | 10 | 9  | 0 | 0 | 38 | 27 |

|                                                                                  |                                                                                                                                                         |                                                                 |   |   |   |    |   |   |   |    |  |
|----------------------------------------------------------------------------------|---------------------------------------------------------------------------------------------------------------------------------------------------------|-----------------------------------------------------------------|---|---|---|----|---|---|---|----|--|
|                                                                                  | [ <i>Roseobacter</i> sp. GAI101]                                                                                                                        | <i>Roseobacter</i> clade)                                       |   |   |   |    |   |   |   |    |  |
| <b>ABC transport system, oligopeptide, periplasmic binding protein</b>           | 67% identity to Oligopeptide ABC transport system, periplasmic binding protein [OppA] [ <i>Pseudovibrio</i> sp. JE062]                                  | Alphaproteobacteria (Rhodobacterales)                           | 0 | 0 | 4 | 10 | 0 | 0 | 4 | 36 |  |
| <b>ABC transport system, oligopeptide, periplasmic binding protein</b>           | 68% identity to Oligopeptide ABC transport system, periplasmic binding protein [OppA] [ <i>Roseovarius nubinhibens</i> ISM]                             | Alphaproteobacteria (Rhodobacterales, <i>Roseobacter</i> clade) | 0 | 0 | 0 | 5  | 0 | 0 | 0 | 15 |  |
| <b>ABC transport system, oligopeptide, periplasmic binding protein</b>           | 66% identity to Oligopeptide ABC transport system, periplasmic binding protein [OppA] [ <i>Roseobacter</i> sp. GAI101]                                  | Alphaproteobacteria (Rhodobacterales, <i>Roseobacter</i> clade) | 0 | 0 | 2 | 4  | 0 | 0 | 3 | 22 |  |
| <b>ABC transport system, oligopeptide, periplasmic binding protein</b>           | 100% identity to Oligopeptide ABC transport system, periplasmic binding protein [OppA] [Rhodobacterales bacterium HTCC2083]                             | Alphaproteobacteria (Rhodobacterales, <i>Roseobacter</i> clade) | 2 | 1 | 0 | 0  | 4 | 8 | 0 | 0  |  |
| <b>ABC transport system, oligopeptide, periplasmic binding protein</b>           | 78% identity to Oligopeptide ABC transport system, periplasmic binding protein [OppA] [Rhodobacterales bacterium HTCC2083]                              | Alphaproteobacteria (Rhodobacterales, <i>Roseobacter</i> clade) | 0 | 0 | 5 | 2  | 0 | 0 | 7 | 5  |  |
| <b>ABC transport system, oligopeptide, periplasmic binding protein</b>           | 60% identity to Oligopeptide ABC transport system, periplasmic binding protein [OppA] [Rhodobacterales bacterium HTCC2255]                              | Alphaproteobacteria (Rhodobacterales, <i>Roseobacter</i> clade) | 0 | 0 | 2 | 2  | 0 | 0 | 2 | 2  |  |
| <b>ABC transport system, oligopeptide, periplasmic binding protein</b>           | 67% identity to Oligopeptide ABC transport system, periplasmic binding protein [OppA] [ <i>Roseobacter denitrificans</i> (strain ATCC 33942 / OCh 114)] | Alphaproteobacteria (Rhodobacterales, <i>Roseobacter</i> clade) | 0 | 0 | 0 | 3  | 0 | 0 | 0 | 5  |  |
| <b>ABC transport system, oligopeptide, periplasmic binding protein</b>           | 63% identity to Oligopeptide ABC transport system, periplasmic binding protein [OppA] [ <i>Oceanicola granulosis</i> HTCC2516]                          | Alphaproteobacteria (Rhodobacterales, <i>Roseobacter</i> clade) | 0 | 0 | 2 | 0  | 0 | 0 | 2 | 0  |  |
| <b>ABC transport system, oligopeptide, periplasmic binding protein</b>           | 68% identity to Oligopeptide ABC transport system, periplasmic binding protein [OppA] [ <i>Reinekea blandensis</i> MED297]                              | Gammaaproteobacteria (unclassified)                             | 0 | 0 | 0 | 4  | 0 | 0 | 0 | 15 |  |
|                                                                                  |                                                                                                                                                         |                                                                 |   |   |   |    |   |   |   |    |  |
| <i>ABC transport system, ectoine/hydroxyectoine</i>                              |                                                                                                                                                         |                                                                 |   |   |   |    |   |   |   |    |  |
| <b>ABC transport system, ectoine/hydroxyectoine, periplasmic binding protein</b> | 88% identity to Ectoine/hydroxyectoine ABC transport system, periplasmic binding protein [EhuB] [ <i>Candidatus Pelagibacter</i> sp. HTCC7211]          | Alphaproteobacteria (SAR11 cluster)                             | 0 | 0 | 1 | 2  | 0 | 0 | 2 | 3  |  |
|                                                                                  |                                                                                                                                                         |                                                                 |   |   |   |    |   |   |   |    |  |
| <i>ABC transport system, glycerol-3-phosphate</i>                                |                                                                                                                                                         |                                                                 |   |   |   |    |   |   |   |    |  |
| <b>ABC transport system, glycerol-3-phosphate, periplasmic binding protein</b>   | 68% identity to Glycerol-3-phosphate ABC transport system, periplasmic binding protein [UgpB] [ <i>Roseobacter</i> sp. AzwK-3b]                         | Alphaproteobacteria (Rhodobacterales, <i>Roseobacter</i> clade) | 0 | 0 | 5 | 8  | 0 | 0 | 5 | 38 |  |
| <b>ABC transport system, glycerol-3-phosphate, periplasmic binding protein</b>   | 66% identity to Glycerol-3-phosphate ABC transport system, periplasmic binding protein [UgpB] [Rhodobacterales bacterium HTCC2083]                      | Alphaproteobacteria (Rhodobacterales, <i>Roseobacter</i> clade) | 0 | 0 | 2 | 0  | 0 | 0 | 2 | 0  |  |

|                                                                                |                                                                                                                                                         |                                                                 |   |   |   |    |   |   |   |    |
|--------------------------------------------------------------------------------|---------------------------------------------------------------------------------------------------------------------------------------------------------|-----------------------------------------------------------------|---|---|---|----|---|---|---|----|
| <b>ABC transport system, glycerol-3-phosphate, periplasmic binding protein</b> | 69% identity to Glycerol-3-phosphate ABC transport system, periplasmic binding protein [Rhodobacterales bacterium HTCC2150]                             | Alphaproteobacteria (Rhodobacterales, <i>Roseobacter</i> clade) | 0 | 0 | 1 | 4  | 0 | 0 | 1 | 9  |
| <b>ABC transport system, glycerol-3-phosphate, periplasmic binding protein</b> | 100% identity to Glycerol-3-phosphate ABC transport system, periplasmic binding protein [Rhodobacterales bacterium HTCC2255]                            | Alphaproteobacteria (Rhodobacterales, <i>Roseobacter</i> clade) | 2 | 0 | 0 | 0  | 3 | 0 | 0 | 0  |
| <b>ABC transport system, glycerol-3-phosphate, periplasmic binding protein</b> | 66% identity to Glycerol-3-phosphate ABC transport system, periplasmic binding protein [UgpB] [ <i>Hoeflea phototrophica</i> DFL-43]                    | Alphaproteobacteria (Rhizobiales)                               | 0 | 0 | 3 | 10 | 0 | 0 | 4 | 25 |
|                                                                                |                                                                                                                                                         |                                                                 |   |   |   |    |   |   |   |    |
| <i>ABC transport system, phosphonate</i>                                       |                                                                                                                                                         |                                                                 |   |   |   |    |   |   |   |    |
| <b>ABC transport system, phosphonate, periplasmic binding protein</b>          | 85% identity to Phosphonate ABC transport system, periplasmic binding protein [PhnD] [ <i>Marinomonas</i> sp. MED121]                                   | Gammaproteobacteria (Oceanospirillales)                         | 0 | 0 | 0 | 3  | 0 | 0 | 0 | 11 |
| <b>ABC transport system, phosphonate, periplasmic binding protein</b>          | 100% identity to Phosphonate ABC transport system, periplasmic binding protein [PhnD] [ <i>Roseobacter denitrificans</i> (strain ATCC 33942 / OCh 114)] | Alphaproteobacteria (Rhodobacterales, <i>Roseobacter</i> clade) | 0 | 0 | 0 | 2  | 0 | 0 | 0 | 5  |
|                                                                                |                                                                                                                                                         |                                                                 |   |   |   |    |   |   |   |    |
| <i>ABC transport system, iron</i>                                              |                                                                                                                                                         |                                                                 |   |   |   |    |   |   |   |    |
| <b>ABC transport system, iron, periplasmic binding protein</b>                 | 88% identity to Iron ABC transport system, periplasmic binding protein [SfuC] [ <i>Candidatus Pelagibacter</i> sp. HTCC7211]                            | Alphaproteobacteria (SAR11 cluster)                             | 0 | 0 | 4 | 3  | 0 | 0 | 4 | 9  |
| <b>ABC transport system, iron, periplasmic binding protein</b>                 | 100% identity to Iron ABC transport system, periplasmic binding protein [SfuC] [ <i>Candidatus Pelagibacter</i> sp. HTCC7211]                           | Alphaproteobacteria (SAR11 cluster)                             | 2 | 1 | 0 | 0  | 3 | 1 | 0 | 0  |
|                                                                                |                                                                                                                                                         |                                                                 |   |   |   |    |   |   |   |    |
| <i>ABC transport system, unknown solute</i>                                    |                                                                                                                                                         |                                                                 |   |   |   |    |   |   |   |    |
| <b>ABC transport system, periplasmic binding protein</b>                       | 41% identity to Putative ABC transport periplasmic binding protein [ <i>Burkholderia glumae</i> (strain BGR1)]                                          | Betaproteobacteria (Burkholderiales)                            | 0 | 0 | 4 | 0  | 0 | 0 | 7 | 0  |
| <b>ABC transport system, periplasmic binding protein</b>                       | 35% identity to Putative ABC transport periplasmic binding protein [ <i>Frankia alni</i> (strain ACN14a)]                                               | Actinobacteria                                                  | 0 | 0 | 0 | 2  | 0 | 0 | 0 | 9  |
|                                                                                |                                                                                                                                                         |                                                                 |   |   |   |    |   |   |   |    |
| <i>ABC transport system, permease</i>                                          |                                                                                                                                                         |                                                                 |   |   |   |    |   |   |   |    |
| <b>ABC transport system, permease</b>                                          | 69% identity to Putative permease of ABC transport system [Nmar_1712] [ <i>Nitrosopumilus maritimus</i> (strain SCM1)]                                  | Marine Group I Crenarchaeota (Nitrosopumilales)                 | 0 | 0 | 0 | 3  | 0 | 0 | 0 | 4  |
| <b>ABC transport system, permease</b>                                          | 93% identity to Putative permease of ABC transport system [Nmar_1714] [ <i>Nitrosopumilus maritimus</i> (strain SCM1)]                                  | Marine Group I Crenarchaeota (Nitrosopumilales)                 | 0 | 0 | 0 | 2  | 0 | 0 | 0 | 2  |

|                                                                         |                                                                                                                                    |                                     |   |   |    |    |   |   |    |     |  |
|-------------------------------------------------------------------------|------------------------------------------------------------------------------------------------------------------------------------|-------------------------------------|---|---|----|----|---|---|----|-----|--|
|                                                                         |                                                                                                                                    |                                     |   |   |    |    |   |   |    |     |  |
| <b>TRAP transporter</b>                                                 |                                                                                                                                    |                                     |   |   |    |    |   |   |    |     |  |
| <b>TRAP dicarboxylate transporter, periplasmic binding protein DctP</b> | 86% identity to TRAP dicarboxylate transporter, periplasmic binding subunit DctP [ <i>Candidatus Pelagibacter ubique</i> HTCC1062] | Alphaproteobacteria (SAR11 cluster) | 0 | 0 | 6  | 13 | 0 | 0 | 45 | 155 |  |
| <b>TRAP dicarboxylate transporter, periplasmic binding protein DctP</b> | 93% identity to TRAP dicarboxylate transporter, periplasmic binding subunit DctP [ <i>Candidatus Pelagibacter</i> sp. HTCC7211]    | Alphaproteobacteria (SAR11 cluster) | 0 | 0 | 10 | 13 | 0 | 0 | 25 | 118 |  |
| <b>TRAP dicarboxylate transporter, periplasmic binding protein DctP</b> | 98% identity to TRAP dicarboxylate transporter, periplasmic binding subunit DctP [ <i>Candidatus Pelagibacter ubique</i> HTCC1002] | Alphaproteobacteria (SAR11 cluster) | 0 | 0 | 15 | 15 | 0 | 0 | 63 | 82  |  |
| <b>TRAP dicarboxylate transporter, periplasmic binding protein DctP</b> | 98% identity to TRAP dicarboxylate transporter, periplasmic binding protein DctP [ <i>Candidatus Pelagibacter ubique</i> HTCC1002] | Alphaproteobacteria (SAR11 cluster) | 0 | 0 | 4  | 8  | 0 | 0 | 12 | 94  |  |
| <b>TRAP dicarboxylate transporter, periplasmic binding protein DctP</b> | 93% identity to TRAP dicarboxylate transporter, periplasmic binding protein DctP [ <i>Candidatus Pelagibacter</i> sp. HTCC7211]    | Alphaproteobacteria (SAR11 cluster) | 0 | 0 | 5  | 7  | 0 | 0 | 13 | 33  |  |
| <b>TRAP dicarboxylate transporter, periplasmic binding protein DctP</b> | 93% identity to TRAP dicarboxylate transporter, periplasmic binding protein DctP [ <i>Candidatus Pelagibacter</i> sp. HTCC7211]    | Alphaproteobacteria (SAR11 cluster) | 0 | 0 | 1  | 4  | 0 | 0 | 1  | 27  |  |
| <b>TRAP dicarboxylate transporter, periplasmic binding protein DctP</b> | 93% identity to TRAP dicarboxylate transporter, periplasmic binding protein DctP [ <i>Candidatus Pelagibacter</i> sp. HTCC7211]    | Alphaproteobacteria (SAR11 cluster) | 0 | 0 | 1  | 5  | 0 | 0 | 2  | 11  |  |
| <b>TRAP dicarboxylate transporter, periplasmic binding protein DctP</b> | 94% identity to TRAP dicarboxylate transporter, periplasmic binding protein DctP [ <i>Candidatus Pelagibacter</i> sp. HTCC7211]    | Alphaproteobacteria (SAR11 cluster) | 0 | 0 | 1  | 2  | 0 | 0 | 1  | 16  |  |
| <b>TRAP dicarboxylate transporter, periplasmic binding protein DctP</b> | 95% identity to TRAP dicarboxylate transporter, periplasmic binding protein DctP [ <i>Candidatus Pelagibacter</i> sp. IMCC9063]    | Alphaproteobacteria (SAR11 cluster) | 0 | 0 | 2  | 4  | 0 | 0 | 2  | 12  |  |
| <b>TRAP dicarboxylate transporter, periplasmic binding protein DctP</b> | 87% identity to TRAP dicarboxylate transporter, periplasmic binding protein DctP [ <i>Candidatus Pelagibacter</i> sp. HTCC7211]    | Alphaproteobacteria (SAR11 cluster) | 0 | 0 | 0  | 4  | 0 | 0 | 0  | 11  |  |
| <b>TRAP dicarboxylate transporter, periplasmic binding protein DctP</b> | 94% identity to TRAP dicarboxylate transporter, periplasmic binding protein DctP [ <i>Candidatus Pelagibacter</i> sp. HTCC7211]    | Alphaproteobacteria (SAR11 cluster) | 0 | 0 | 1  | 2  | 0 | 0 | 1  | 13  |  |
| <b>TRAP dicarboxylate transporter, periplasmic binding protein DctP</b> | 97% identity to TRAP dicarboxylate transporter, periplasmic binding protein DctP [ <i>Candidatus Pelagibacter ubique</i> HTCC1062] | Alphaproteobacteria (SAR11 cluster) | 3 | 3 | 0  | 0  | 3 | 8 | 0  | 0   |  |
| <b>TRAP dicarboxylate transporter, periplasmic binding protein DctP</b> | 83% identity to TRAP dicarboxylate transporter, periplasmic binding protein DctP [ <i>Candidatus Pelagibacter</i> sp. HTCC7211]    | Alphaproteobacteria (SAR11 cluster) | 0 | 0 | 1  | 2  | 0 | 0 | 4  | 9   |  |
| <b>TRAP dicarboxylate transporter, periplasmic binding protein DctP</b> | 88% identity to TRAP dicarboxylate transporter, periplasmic binding protein DctP [ <i>Candidatus Pelagibacter</i> sp. HTCC7211]    | Alphaproteobacteria (SAR11 cluster) | 0 | 0 | 1  | 2  | 0 | 0 | 1  | 10  |  |
| <b>TRAP dicarboxylate transporter, periplasmic binding protein DctP</b> | 86% identity to TRAP dicarboxylate transporter, periplasmic binding protein DctP [ <i>Candidatus</i>                               | Alphaproteobacteria (SAR11 cluster) | 0 | 0 | 2  | 7  | 0 | 0 | 2  | 23  |  |



|                                                                                             |                                                                                                                                                  |                                                                 |   |   |   |    |    |    |    |    |
|---------------------------------------------------------------------------------------------|--------------------------------------------------------------------------------------------------------------------------------------------------|-----------------------------------------------------------------|---|---|---|----|----|----|----|----|
| <b>TRAP-associated extracytoplasmic immunity (TAXI) protein</b>                             | 82% identity to TRAP-associated extracytoplasmic immunity (TAXI) protein [ <i>Candidatus</i> Pelagibacter sp. HTCC7211]                          | Alphaproteobacteria (SAR11 cluster)                             | 0 | 0 | 5 | 11 | 0  | 0  | 18 | 77 |
| <b>TRAP-associated extracytoplasmic immunity (TAXI) protein</b>                             | 98% identity to TRAP-associated extracytoplasmic immunity (TAXI) protein [ <i>Candidatus</i> Pelagibacter ubique HTCC1002]                       | Alphaproteobacteria (SAR11 cluster)                             | 0 | 0 | 3 | 7  | 0  | 0  | 13 | 28 |
| <b>TRAP-associated extracytoplasmic immunity (TAXI) protein</b>                             | 81% identity to TRAP-associated extracytoplasmic immunity (TAXI) protein [Rhodobacterales bacterium HTCC2255]                                    | Alphaproteobacteria (Rhodobacterales, <i>Roseobacter</i> clade) | 0 | 0 | 3 | 3  | 0  | 0  | 12 | 18 |
| <b>TRAP-associated extracytoplasmic immunity (TAXI) protein</b>                             | 100% identity to TRAP-associated extracytoplasmic immunity (TAXI) protein [ <i>Ruegeria pomeroyi</i> DSS-3]                                      | Alphaproteobacteria (Rhodobacterales, <i>Roseobacter</i> clade) | 0 | 1 | 1 | 2  | 0  | 2  | 1  | 5  |
|                                                                                             |                                                                                                                                                  |                                                                 |   |   |   |    |    |    |    |    |
| <b>Tripartite tricarboxylate transporter (TTT)</b>                                          |                                                                                                                                                  |                                                                 |   |   |   |    |    |    |    |    |
| <b>Tripartite tricarboxylate transporter (TTT), periplasmic binding protein TctC</b>        | 100% identity to Tripartite tricarboxylate transporter (TTT), periplasmic binding protein TctC [ <i>Candidatus</i> Pelagibacter ubique HTCC1002] | Alphaproteobacteria (SAR11 cluster)                             | 5 | 4 | 0 | 0  | 12 | 22 | 0  | 0  |
| <b>Tripartite tricarboxylate transporter (TTT), periplasmic binding protein TctC</b>        | 81% identity to Tripartite tricarboxylate transporter (TTT), periplasmic binding protein TctC [ <i>Candidatus</i> Pelagibacter sp. IMCC9063]     | Alphaproteobacteria (SAR11 cluster)                             | 0 | 0 | 6 | 6  | 0  | 0  | 16 | 27 |
| <b>Tripartite tricarboxylate transporter (TTT), periplasmic binding protein TctC</b>        | 96% identity to Tripartite tricarboxylate transporter (TTT), periplasmic binding protein TctC [ <i>Candidatus</i> Pelagibacter ubique HTCC1002]  | Alphaproteobacteria (SAR11 cluster)                             | 0 | 0 | 4 | 3  | 0  | 0  | 10 | 13 |
| <b>Tripartite tricarboxylate transporter (TTT), periplasmic binding protein TctC</b>        | 63% identity to Tripartite tricarboxylate transporter (TTT), periplasmic binding protein TctC [ <i>Silicibacter lacuscaerulensis</i> ITI-1157]   | Alphaproteobacteria (Rhodobacterales, <i>Roseobacter</i> clade) | 0 | 0 | 2 | 3  | 0  | 0  | 3  | 11 |
| <b>Tripartite tricarboxylate transporter (TTT) family, periplasmic binding protein TctC</b> | 66% identity to Tripartite tricarboxylate transporter (TTT), periplasmic binding protein TctC [ <i>Silicibacter lacuscaerulensis</i> ITI-1157]   | Alphaproteobacteria (Rhodobacterales, <i>Roseobacter</i> clade) | 0 | 0 | 1 | 3  | 0  | 0  | 2  | 10 |
|                                                                                             |                                                                                                                                                  |                                                                 |   |   |   |    |    |    |    |    |
| <b>Permease for cytosine/purines, uracil, thiamine, allantoin</b>                           |                                                                                                                                                  |                                                                 |   |   |   |    |    |    |    |    |
| <b>Permease for cytosine/purines, uracil, thiamine, allantoin</b>                           | 98% identity to Permease for cytosine/purines, uracil, thiamine, allantoin [ <i>Candidatus</i> Pelagibacter ubique HTCC1002]                     | Alphaproteobacteria (SAR11 cluster)                             | 0 | 0 | 0 | 3  | 0  | 0  | 0  | 8  |
|                                                                                             |                                                                                                                                                  |                                                                 |   |   |   |    |    |    |    |    |
| <b>Ammonium transporter</b>                                                                 |                                                                                                                                                  |                                                                 |   |   |   |    |    |    |    |    |
| <b>Ammonium transporter</b>                                                                 | 68% identity to Ammonium transporter [Amt] [ <i>Octadecabacter antarcticus</i> 238]                                                              | Alphaproteobacteria (Rhodobacterales, <i>Roseobacter</i> clade) | 0 | 0 | 0 | 3  | 0  | 0  | 0  | 22 |
| <b>Ammonium transporter</b>                                                                 | 52% identity to Ammonium transporter [Amt] [ <i>Roseovarius nubinhibens</i> ISM]                                                                 | Alphaproteobacteria (Rhodobacterales,                           | 0 | 0 | 1 | 2  | 0  | 0  | 6  | 2  |





|                                                         |                                                                                                                  |                                                 |   |   |    |   |    |   |    |    |
|---------------------------------------------------------|------------------------------------------------------------------------------------------------------------------|-------------------------------------------------|---|---|----|---|----|---|----|----|
| <b>Preprotein translocase</b>                           |                                                                                                                  |                                                 |   |   |    |   |    |   |    |    |
| <b>Preprotein translocase, YajC subunit</b>             | 82% identity to Preprotein translocase, YajC subunit [ <i>Candidatus</i> Pelagibacter ubique HTCC1062]           | Alphaproteobacteria (SAR11 cluster)             | 3 | 0 | 0  | 0 | 8  | 0 | 0  | 0  |
| <b>Preprotein translocase, YajC subunit</b>             | 80% identity to Preprotein translocase, YajC subunit [ <i>Candidatus</i> Pelagibacter ubique HTCC1062]           | Alphaproteobacteria (SAR11 cluster)             | 0 | 0 | 2  | 0 | 0  | 0 | 3  | 0  |
| <b>SecD protein</b>                                     | 62% identity to Protein-export membrane protein SecD precursor [Rmag_1006] [ <i>Candidatus</i> Ruthia magnifica] | Gammaproteobacteria (GSO-EOSA-1)                | 0 | 0 | 0  | 3 | 0  | 0 | 0  | 3  |
| <b>Preprotein translocase, SecY subunit</b>             | 93% identity to Preprotein translocase subunit SecY [Nmar_0402] [ <i>Nitrosopumilus maritimus</i> (strain SCM1)] | Marine Group I Crenarchaeota (Nitrosopumilales) | 0 | 0 | 0  | 3 | 0  | 0 | 0  | 7  |
|                                                         |                                                                                                                  |                                                 |   |   |    |   |    |   |    |    |
| <b>Outer Membrane – Transport, Attachment, Motility</b> |                                                                                                                  |                                                 |   |   |    |   |    |   |    |    |
| <b>TonB-dependent receptor (TBDR)</b>                   |                                                                                                                  |                                                 |   |   |    |   |    |   |    |    |
| <b>TonB-dependent receptor</b>                          | 52% identity to TonB-dependent receptor [ <i>Maricaulis maris</i> MCS10]                                         | Alphaproteobacteria (Rhodobacterales)           | 0 | 0 | 2  | 0 | 0  | 0 | 2  | 0  |
| <b>TonB-dependent receptor</b>                          | 100% identity to TonB-dependent receptor [ <i>Sphingopyxis alaskensis</i> RB2256]                                | Alphaproteobacteria (Sphingomonadales)          | 8 | 0 | 0  | 0 | 10 | 0 | 0  | 0  |
| <b>TonB-dependent receptor</b>                          | 100% identity to TonB-dependent receptor [ <i>Sphingopyxis alaskensis</i> RB2256]                                | Alphaproteobacteria (Sphingomonadales)          | 4 | 0 | 0  | 0 | 4  | 0 | 0  | 0  |
| <b>TonB-dependent receptor</b>                          | 33% identity to TonB-dependent receptor [ <i>Erythrobacter litoralis</i> (strain HTCC2594)]                      | Alphaproteobacteria (Sphingomonadales)          | 0 | 0 | 0  | 3 | 0  | 0 | 0  | 15 |
| <b>TonB-dependent receptor</b>                          | 60% identity to TonB-dependent receptor [ <i>Caulobacter segnis</i> ATCC 21756]                                  | Alphaproteobacteria (Caulobacterales)           | 0 | 0 | 2  | 0 | 0  | 0 | 3  | 0  |
| <b>TonB-dependent receptor</b>                          | 40% identity to TonB-dependent receptor [ <i>Caulobacter segnis</i> ATCC 21756]                                  | Alphaproteobacteria (Caulobacterales)           | 0 | 0 | 2  | 0 | 0  | 0 | 2  | 0  |
| <b>TonB-dependent receptor</b>                          | 43% identity to TonB-dependent receptor [ <i>Shewanella denitrificans</i> OS217]                                 | Gammaproteobacteria (Alteromonadales)           | 0 | 0 | 10 | 9 | 0  | 0 | 45 | 30 |
| <b>TonB-dependent receptor</b>                          | 39% identity to TonB-dependent receptor [ <i>Shewanella loihica</i> PV-4]                                        | Gammaproteobacteria (Alteromonadales)           | 0 | 0 | 8  | 1 | 0  | 0 | 41 | 1  |
| <b>TonB-dependent receptor</b>                          | 62% identity to TonB-dependent receptor [ <i>Shewanella benthica</i> KT99]                                       | Gammaproteobacteria (Alteromonadales)           | 0 | 0 | 2  | 0 | 0  | 0 | 13 | 0  |
| <b>TonB-dependent receptor</b>                          | 100% identity to TonB-dependent receptor [ <i>Pseudoalteromonas tunicata</i> D2]                                 | Gammaproteobacteria (Alteromonadales)           | 2 | 0 | 0  | 0 | 6  | 0 | 0  | 0  |
| <b>TonB-dependent receptor</b>                          | 32% identity to TonB-dependent receptor [ <i>Shewanella</i> sp. MR-4]                                            | Gammaproteobacteria (Alteromonadales)           | 0 | 0 | 2  | 0 | 0  | 0 | 5  | 0  |
| <b>TonB-dependent receptor</b>                          | 43% identity to TonB-dependent receptor [ <i>Alteromonas macleodii</i> ATCC 27126]                               | Gammaproteobacteria (Alteromonadales)           | 0 | 0 | 3  | 0 | 0  | 0 | 4  | 0  |

|                                |                                                                                                    |                                       |   |   |   |   |    |   |    |   |
|--------------------------------|----------------------------------------------------------------------------------------------------|---------------------------------------|---|---|---|---|----|---|----|---|
| <b>TonB-dependent receptor</b> | 48% identity to TonB-dependent receptor [Alteromonadales bacterium TW-7]                           | Gammaproteobacteria (Alteromonadales) | 0 | 0 | 0 | 2 | 0  | 0 | 0  | 6 |
| <b>TonB-dependent receptor</b> | 100% identity to TonB-dependent receptor [Alteromonadales bacterium TW-7]                          | Gammaproteobacteria (Alteromonadales) | 4 | 0 | 0 | 0 | 11 | 0 | 0  | 0 |
| <b>TonB-dependent receptor</b> | 33% identity to TonB-dependent receptor [ <i>Pseudomonas fluorescens</i> (strain SBW25)]           | Gammaproteobacteria (Pseudomonadales) | 0 | 0 | 2 | 0 | 0  | 0 | 3  | 0 |
| <b>TonB-dependent receptor</b> | 47% identity to TonB-dependent receptor [ <i>Xanthomonas axonopodis</i> pv. citri (Citrus canker)] | Gammaproteobacteria (Xanthomonadales) | 0 | 0 | 0 | 3 | 0  | 0 | 0  | 7 |
| <b>TonB-dependent receptor</b> | 50% identity to TonB-dependent receptor [ <i>Xanthomonas campestris</i> pv. <i>campestris</i> ]    | Gammaproteobacteria (Xanthomonadales) | 0 | 0 | 2 | 1 | 0  | 0 | 3  | 3 |
| <b>TonB-dependent receptor</b> | 73% identity to TonB-dependent receptor [uncultured marine gamma proteobacterium EB000-45B06]      | Gammaproteobacteria (unclassified)    | 0 | 0 | 7 | 1 | 0  | 0 | 13 | 2 |
| <b>TonB-dependent receptor</b> | 61% identity to TonB-dependent receptor [gamma proteobacterium IMCC3088]                           | Gammaproteobacteria (unclassified)    | 0 | 0 | 2 | 0 | 0  | 0 | 3  | 0 |
| <b>TonB-dependent receptor</b> | 50% identity to TonB-dependent receptor [gamma proteobacterium NOR5-3]                             | Gammaproteobacteria (OMG)             | 0 | 0 | 3 | 0 | 0  | 0 | 15 | 0 |
| <b>TonB-dependent receptor</b> | 100% identity to TonB-dependent receptor [gamma proteobacterium NOR51-B]                           | Gammaproteobacteria (OMG)             | 2 | 0 | 0 | 0 | 5  | 0 | 0  | 0 |
| <b>TonB-dependent receptor</b> | 47% identity to TonB-dependent receptor [gamma proteobacterium NOR5-3]                             | Gammaproteobacteria (OMG)             | 0 | 0 | 1 | 3 | 0  | 0 | 1  | 5 |
| <b>TonB-dependent receptor</b> | 61% identity to TonB-dependent receptor [gamma proteobacterium NOR5-3]                             | Gammaproteobacteria (OMG)             | 0 | 0 | 2 | 0 | 0  | 0 | 3  | 0 |
| <b>TonB-dependent receptor</b> | 37% identity to TonB-dependent receptor [gamma proteobacterium NOR5-3]                             | Gammaproteobacteria (OMG)             | 0 | 0 | 2 | 1 | 0  | 0 | 6  | 1 |
| <b>TonB-dependent receptor</b> | 100% identity to TonB-dependent receptor [marine gamma proteobacterium HTCC2207]                   | Gammaproteobacteria (OMG)             | 3 | 1 | 0 | 0 | 11 | 1 | 0  | 0 |
| <b>TonB-dependent receptor</b> | 52% identity to TonB-dependent receptor [marine gamma proteobacterium HTCC2148]                    | Gammaproteobacteria (OMG)             | 0 | 0 | 5 | 1 | 0  | 0 | 6  | 5 |
| <b>TonB-dependent receptor</b> | 43% identity to TonB-dependent receptor [marine gamma proteobacterium HTCC2148]                    | Gammaproteobacteria (OMG)             | 0 | 0 | 3 | 1 | 0  | 0 | 11 | 5 |
| <b>TonB-dependent receptor</b> | 76% identity to TonB-dependent receptor [marine gamma proteobacterium HTCC2148]                    | Gammaproteobacteria (OMG)             | 0 | 0 | 5 | 2 | 0  | 0 | 12 | 3 |
| <b>TonB-dependent receptor</b> | 50% identity to TonB-dependent receptor [marine gamma proteobacterium HTCC2148]                    | Gammaproteobacteria (OMG)             | 0 | 0 | 1 | 2 | 0  | 0 | 1  | 5 |
| <b>TonB-dependent receptor</b> | 67% identity to TonB-dependent receptor [ <i>Congregibacter litoralis</i> KT71]                    | Gammaproteobacteria (OMG)             | 0 | 0 | 3 | 0 | 0  | 0 | 9  | 0 |
| <b>TonB-dependent receptor</b> | 65% identity to TonB-dependent receptor [marine gamma proteobacterium HTCC2207]                    | Gammaproteobacteria (OMG)             | 0 | 0 | 2 | 0 | 0  | 0 | 6  | 0 |
| <b>TonB-dependent receptor</b> | 30% identity to TonB-dependent receptor [marine gamma proteobacterium HTCC2148]                    | Gammaproteobacteria (OMG)             | 0 | 0 | 1 | 2 | 0  | 0 | 1  | 6 |

|                                            |                                                                                                                               |                               |   |   |    |   |   |   |    |   |
|--------------------------------------------|-------------------------------------------------------------------------------------------------------------------------------|-------------------------------|---|---|----|---|---|---|----|---|
| <b>TonB-dependent receptor</b>             | 73% identity to TonB-dependent receptor [marine gamma proteobacterium HTCC2143]                                               | Gammaproteobacteria (OMG)     | 1 | 0 | 2  | 2 | 2 | 0 | 7  | 7 |
| <b>TonB-dependent receptor</b>             | 56% identity to TonB-dependent receptor [marine gamma proteobacterium HTCC2207]                                               | Gammaproteobacteria (OMG)     | 0 | 0 | 1  | 4 | 0 | 0 | 4  | 7 |
| <b>TonB-dependent receptor</b>             | 100% identity to TonB-dependent receptor [uncultured marine bacterium EB0_49D07]                                              | Bacteria (unclassified)       | 0 | 3 | 0  | 0 | 0 | 3 | 0  | 0 |
| <b>TonB-dependent receptor</b>             | 75% identity to TonB-dependent receptor [ <i>Polaribacter</i> sp. MED152]                                                     | Bacteroidetes (Flavobacteria) | 0 | 0 | 5  | 0 | 0 | 0 | 6  | 0 |
| <b>TonB-dependent receptor</b>             | 61% identity to TonB-dependent receptor [gamma proteobacterium HTCC2207]                                                      | Bacteroidetes (Flavobacteria) | 0 | 0 | 2  | 0 | 0 | 0 | 2  | 0 |
| <b>TonB-dependent receptor (SusC/RagA)</b> | 42% identity to TonB-dependent receptor [SusC/RagA] [ <i>Dyadobacter fermentans</i> (strain ATCC 700827 / DSM 18053 / NS114)] | Bacteroidetes (Flavobacteria) | 0 | 0 | 2  | 0 | 0 | 0 | 2  | 0 |
| <b>TonB-dependent receptor (SusC/RagA)</b> | 55% identity to TonB-dependent receptor [SusC/RagA] [ <i>Psychroflexus torquis</i> ATCC 700755]                               | Bacteroidetes (Flavobacteria) | 0 | 0 | 10 | 0 | 0 | 0 | 20 | 0 |
| <b>TonB-dependent receptor (SusC/RagA)</b> | 51% identity to TonB-dependent receptor [SusC/RagA] [ <i>Psychroflexus torquis</i> ATCC 700755]                               | Bacteroidetes (Flavobacteria) | 0 | 0 | 7  | 0 | 0 | 0 | 18 | 0 |
| <b>TonB-dependent receptor (SusC/RagA)</b> | 64% identity to TonB-dependent receptor [SusC/RagA] [ <i>Cellulophaga lytica</i> DSM 7489]                                    | Bacteroidetes (Flavobacteria) | 0 | 0 | 10 | 0 | 0 | 0 | 14 | 0 |
| <b>TonB-dependent receptor (SusC/RagA)</b> | 84% identity to TonB-dependent receptor plug [Flavobacteria bacterium MS024-2A]                                               | Bacteroidetes (Flavobacteria) | 0 | 0 | 3  | 1 | 0 | 0 | 12 | 2 |
| <b>TonB-dependent receptor (SusC/RagA)</b> | 73% identity to TonB-dependent receptor [SusC/RagA] [Flavobacteria bacterium MS024-2A]                                        | Bacteroidetes (Flavobacteria) | 0 | 0 | 6  | 0 | 0 | 0 | 12 | 0 |
| <b>TonB-dependent receptor (SusC/RagA)</b> | 82% identity to TonB-dependent receptor [SusC/RagA] [Flavobacteria bacterium MS024-2A]                                        | Bacteroidetes (Flavobacteria) | 0 | 0 | 4  | 1 | 0 | 0 | 12 | 1 |
| <b>TonB-dependent receptor (SusC/RagA)</b> | 84% identity to TonB-dependent receptor [SusC/RagA] [Flavobacteria bacterium MS024-2A]                                        | Bacteroidetes (Flavobacteria) | 0 | 0 | 3  | 1 | 0 | 0 | 15 | 1 |
| <b>TonB-dependent receptor (SusC/RagA)</b> | 76% identity to TonB-dependent receptor [SusC/RagA] [ <i>Polaribacter</i> sp. MED152]                                         | Bacteroidetes (Flavobacteria) | 0 | 0 | 6  | 0 | 0 | 0 | 12 | 0 |
| <b>TonB-dependent receptor (SusC/RagA)</b> | 88% identity to TonB-dependent receptor [SusC/RagA] [Flavobacteria bacterium MS024-2A]                                        | Bacteroidetes (Flavobacteria) | 0 | 0 | 3  | 0 | 0 | 0 | 8  | 0 |
| <b>TonB-dependent receptor (SusC/RagA)</b> | 63% identity to TonB-dependent receptor [SusC/RagA] [ <i>Cellulophaga lytica</i> DSM 7489]                                    | Bacteroidetes (Flavobacteria) | 0 | 0 | 6  | 0 | 0 | 0 | 6  | 0 |
| <b>TonB-dependent receptor (SusC/RagA)</b> | 55% identity to TonB-dependent receptor [SusC/RagA] [Flavobacteria bacterium MS024-2A]                                        | Bacteroidetes (Flavobacteria) | 0 | 0 | 2  | 0 | 0 | 0 | 7  | 0 |
| <b>TonB-dependent receptor (SusC/RagA)</b> | 69% identity to TonB-dependent receptor [SusC/RagA] [ <i>Polaribacter</i> sp. MED152]                                         | Bacteroidetes (Flavobacteria) | 0 | 0 | 3  | 0 | 0 | 0 | 3  | 0 |

|                                            |                                                                                                                                             |                               |   |   |    |   |   |   |    |   |
|--------------------------------------------|---------------------------------------------------------------------------------------------------------------------------------------------|-------------------------------|---|---|----|---|---|---|----|---|
| <b>TonB-dependent receptor (SusC/RagA)</b> | 66% identity to TonB-dependent receptor [SusC/RagA] [ <i>Polaribacter</i> sp. MED152]                                                       | Bacteroidetes (Flavobacteria) | 0 | 0 | 5  | 0 | 0 | 0 | 5  | 0 |
| <b>TonB-dependent receptor (SusC/RagA)</b> | 59% identity to TonB-dependent receptor [SusC/RagA][ <i>Zunongwangia profunda</i> SM-A87]                                                   | Bacteroidetes (Flavobacteria) | 0 | 0 | 3  | 0 | 0 | 0 | 3  | 0 |
| <b>TonB-dependent receptor (SusC/RagA)</b> | 46% identity to TonB-dependent receptor [SusC/RagA] [Flavobacteria bacterium MS024-2A]                                                      | Bacteroidetes (Flavobacteria) | 0 | 0 | 2  | 0 | 0 | 0 | 2  | 0 |
| <b>TonB-dependent receptor (SusC/RagA)</b> | 80% identity to TonB-dependent receptor [SusC/RagA] [ <i>Polaribacter irgensii</i> 23-P]                                                    | Bacteroidetes (Flavobacteria) | 0 | 0 | 5  | 0 | 0 | 0 | 10 | 0 |
| <b>TonB-dependent receptor (SusC/RagA)</b> | 72% identity to TonB-dependent receptor [SusC/RagA] [ <i>Polaribacter irgensii</i> 23-P]                                                    | Bacteroidetes (Flavobacteria) | 0 | 0 | 14 | 0 | 0 | 0 | 27 | 0 |
| <b>TonB-dependent receptor (SusC/RagA)</b> | 62% identity to TonB-dependent receptor [SusC/RagA] [ <i>Robiginitalea biformata</i> HTCC2501]                                              | Bacteroidetes (Flavobacteria) | 0 | 0 | 7  | 0 | 0 | 0 | 12 | 0 |
| <b>TonB-dependent receptor (SusC/RagA)</b> | 40% identity to TonB-dependent receptor [SusC/RagA] [ <i>Capnocytophaga ochracea</i> (strain ATCC 27872 / DSM 7271 / JCM 12966 / VPI 2845)] | Bacteroidetes (Flavobacteria) | 0 | 0 | 1  | 4 | 0 | 0 | 6  | 6 |
| <b>TonB-dependent receptor (SusC/RagA)</b> | 46% identity to TonB-dependent receptor [SusC/RagA] [ <i>Spirosoma linguale</i> DSM 74]                                                     | Bacteroidetes (Cytophagia)    | 0 | 0 | 3  | 2 | 0 | 0 | 5  | 3 |
| <b>TonB-dependent receptor (SusC/RagA)</b> | 52% identity to TonB-dependent receptor [SusC/RagA] [ <i>Zunongwangia profunda</i> SM-A87]                                                  | Bacteroidetes (Flavobacteria) | 0 | 0 | 2  | 0 | 0 | 0 | 2  | 0 |
| <b>TonB-dependent receptor (SusC/RagA)</b> | 42% identity to TonB-dependent receptor [SusC/RagA] [ <i>Leadbetterella byssophila</i> (strain DSM 17132 / KACC 11308 / 4M15)]              | Bacteroidetes (Cytophagia)    | 0 | 0 | 3  | 0 | 0 | 0 | 3  | 0 |
| <b>TonB-dependent receptor (SusC/RagA)</b> | 46% identity to TonB-dependent receptor [SusC/RagA] [ <i>Zunongwangia profunda</i> (strain DSM 18752 / CCTCC AB 206139 / SM-A87)]           | Bacteroidetes (Flavobacteria) | 0 | 0 | 2  | 0 | 0 | 0 | 2  | 0 |
| <b>TonB-dependent receptor (SusC/RagA)</b> | 53% identity to TonB-dependent receptor [SusC/RagA] [ <i>Polaribacter</i> sp. MED152]                                                       | Bacteroidetes (Flavobacteria) | 0 | 0 | 2  | 0 | 0 | 0 | 3  | 0 |
| <b>TonB-dependent receptor (SusC/RagA)</b> | 90% identity to TonB-dependent receptor [SusC/RagA] [ <i>Polaribacter irgensii</i> 23-P]                                                    | Bacteroidetes (Flavobacteria) | 0 | 0 | 9  | 0 | 0 | 0 | 20 | 0 |
| <b>TonB-dependent receptor (SusC/RagA)</b> | 48% identity to TonB-dependent receptor [SusC/RagA] [Flavobacteriales bacterium ALC-1]                                                      | Bacteroidetes (Flavobacteria) | 0 | 0 | 3  | 0 | 0 | 0 | 4  | 0 |
| <b>TonB-dependent receptor (SusC/RagA)</b> | 61% identity to TonB-dependent receptor [SusC/RagA] [ <i>Polaribacter irgensii</i> 23-P]                                                    | Bacteroidetes (Flavobacteria) | 0 | 0 | 7  | 0 | 0 | 0 | 10 | 0 |
| <b>TonB-dependent receptor (SusC/RagA)</b> | 37% identity to TonB-dependent receptor [SusC/RagA] [ <i>Capnocytophaga ochracea</i> (strain ATCC 27872 / DSM 7271 / JCM 12966 / VPI 2845)] | Bacteroidetes (Flavobacteria) | 0 | 0 | 3  | 1 | 0 | 0 | 8  | 1 |
| <b>TonB-dependent receptor (SusC/RagA)</b> | 56% identity to TonB-dependent receptor [SusC/RagA] [ <i>Robiginitalea biformata</i> (strain ATCC BAA-864 / HTCC2501 / KCTC 12146)]         | Bacteroidetes (Flavobacteria) | 0 | 0 | 3  | 0 | 0 | 0 | 7  | 0 |

|                                             |                                                                                                                                                                |                                         |   |   |   |   |    |   |   |   |
|---------------------------------------------|----------------------------------------------------------------------------------------------------------------------------------------------------------------|-----------------------------------------|---|---|---|---|----|---|---|---|
| <b>TonB-dependent receptor (SusC/RagA)</b>  | 45% identity to TonB-dependent receptor [SusC/RagA] [ <i>Cellulophaga algicola</i> (strain DSM 14237 / IC166 / ACAM 630)]                                      | Bacteroidetes (Flavobacteria)           | 0 | 0 | 4 | 0 | 0  | 0 | 6 | 0 |
| <b>TonB-dependent receptor (SusC/RagA)</b>  | 100% identity to TonB-dependent receptor [SusC/RagA] [ <i>Capnocytophaga sputigena</i> Capno]                                                                  | Bacteroidetes (Flavobacteria)           | 2 | 0 | 0 | 0 | 5  | 0 | 0 | 0 |
| <b>TonB-dependent receptor (SusC/RagA)</b>  | 44% identity to TonB-dependent receptor [SusC/RagA] [ <i>Marivirga tractuosa</i> (strain ATCC 23168 / DSM 4126 / NBRC 15989 / NCIMB 1408 / VKM B-1430 / H-43)] | Bacteroidetes (Flavobacteria)           | 0 | 0 | 2 | 1 | 0  | 0 | 3 | 2 |
| <b>TonB-dependent receptor (SusC/RagA)</b>  | 61% identity to TonB-dependent receptor [SusC/RagA] [ <i>Dokdonia donghaensis</i> MED134]                                                                      | Bacteroidetes (Flavobacteria)           | 0 | 0 | 4 | 0 | 0  | 0 | 6 | 0 |
| <b>TonB-dependent receptor (SusC/RagA)</b>  | 47% identity to TonB-dependent receptor [SusC/RagA] [ <i>Cellulophaga algicola</i> (strain DSM 14237 / IC166 / ACAM 630)]                                      | Bacteroidetes (Flavobacteria)           | 0 | 0 | 2 | 0 | 0  | 0 | 3 | 0 |
| <b>TonB-dependent receptor (SusC/RagA)</b>  | 66% identity to TonB-dependent receptor [SusC/RagA] [ <i>Croceibacter atlanticus</i> (strain ATCC BAA-628 / HTCC2559 / KCTC 12090)]                            | Bacteroidetes (Flavobacteria)           | 0 | 0 | 2 | 0 | 0  | 0 | 4 | 0 |
| <b>Outer membrane protein (SusD/RagB)</b>   | 53% identity to SusD/RagB outer membrane protein [ <i>Cellulophaga algicola</i> (strain DSM 14237 / IC166 / ACAM 630)]                                         | Bacteroidetes (Flavobacteria)           | 0 | 0 | 2 | 0 | 0  | 0 | 2 | 0 |
| <b>Outer membrane protein (SusD/RagB)</b>   | 63% identity to SusD/RagB outer membrane protein [Flavobacteriales bacterium ALC-1]                                                                            | Bacteroidetes (Flavobacteria)           | 0 | 0 | 1 | 2 | 0  | 0 | 1 | 2 |
|                                             |                                                                                                                                                                |                                         |   |   |   |   |    |   |   |   |
| <b>Gliding motility protein</b>             |                                                                                                                                                                |                                         |   |   |   |   |    |   |   |   |
| <b>Gliding motility protein</b>             | 100% identity to Gliding motility protein [GldL] [Flavobacteria bacterium MS024-2A]                                                                            | Bacteroidetes (Flavobacteria)           | 0 | 0 | 2 | 0 | 0  | 0 | 2 | 0 |
|                                             |                                                                                                                                                                |                                         |   |   |   |   |    |   |   |   |
| <b>Flagellin</b>                            |                                                                                                                                                                |                                         |   |   |   |   |    |   |   |   |
| <b>Flagellin</b>                            | 100% identity to Flagellin [ <i>Sphingopyxis alaskensis</i> RB2256]                                                                                            | Alphaproteobacteria (Sphingomonadales)  | 5 | 0 | 0 | 0 | 7  | 0 | 0 | 0 |
| <b>Flagellin</b>                            | 100% identity to Flagellin (FliC-like) [ <i>Pseudoalteromonas haloplanktis</i> TAC125]                                                                         | Gammaproteobacteria (Alteromonadales)   | 5 | 0 | 0 | 0 | 16 | 0 | 0 | 0 |
| <b>Flagellin</b>                            | 100% identity to Flagellin [ <i>Moritella</i> sp. PE36]                                                                                                        | Gammaproteobacteria (Alteromonadales)   | 2 | 0 | 0 | 0 | 7  | 0 | 0 | 0 |
| <b>Flagellin</b>                            | 100% identity to Flagellin [ <i>Escherichia coli</i> str. K-12 substr. MG1655] ( <i>likely contaminant</i> )                                                   | Gammaproteobacteria (Enterobacteriales) | 0 | 2 | 0 | 0 | 0  | 2 | 0 | 0 |
|                                             |                                                                                                                                                                |                                         |   |   |   |   |    |   |   |   |
| <b>OmpA/MotB/Oar outer membrane protein</b> |                                                                                                                                                                |                                         |   |   |   |   |    |   |   |   |
| <b>OmpA/MotB</b>                            | 80% identity to OmpA/MotB family protein [ <i>Candidatus Pelagibacter ubique</i> HTCC1002]                                                                     | Alphaproteobacteria (SAR11 cluster)     | 0 | 0 | 2 | 0 | 0  | 0 | 7 | 0 |

|                                              |                                                                                                                      |                                         |   |   |   |   |   |   |    |   |
|----------------------------------------------|----------------------------------------------------------------------------------------------------------------------|-----------------------------------------|---|---|---|---|---|---|----|---|
| <b>Oar protein</b>                           | 31% identity to Oar-like outer membrane protein / OmpA/MotB family protein [ <i>Maricaulis maris</i> (strain MCS10)] | Alphaproteobacteria (Rhodobacterales)   | 0 | 0 | 3 | 3 | 0 | 0 | 4  | 6 |
| <b>OmpA/MotB</b>                             | 100% identity to OmpA/MotB family protein [ <i>Spingopyxis alaskensis</i> RB2256]                                    | Alphaproteobacteria (Sphingomonadales)  | 4 | 0 | 0 | 0 | 8 | 0 | 0  | 0 |
| <b>OmpA/MotB</b>                             | 96% identity to Outer membrane protein A [OmpA] [ <i>Shigella dysenteriae</i> ]                                      | Gammaproteobacteria (Enterobacteriales) | 0 | 2 | 0 | 0 | 0 | 3 | 0  | 0 |
| <b>Oar/OmpA protein</b>                      | 31% identity to OmpA family Oar-like protein [ <i>Pseudoalteromonas</i> sp. SM9913]                                  | Gammaproteobacteria (Alteromonadales)   | 0 | 0 | 8 | 0 | 0 | 0 | 18 | 0 |
| <b>OmpA</b>                                  | 100% identity to OmpA family protein with TonB box [Alteromonadales strain TW-7]                                     | Gammaproteobacteria (Alteromonadales)   | 3 | 0 | 0 | 0 | 6 | 0 | 0  | 0 |
| <b>OmpA/MotB</b>                             | 65% identity to OmpA/MotB family protein [Rmag_0516] [ <i>Candidatus</i> Ruthia magna]                               | Gammaproteobacteria (GSO-EOSA-1)        | 0 | 0 | 0 | 3 | 0 | 0 | 0  | 7 |
| <b>OmpA/MotB</b>                             | 89% identity to OmpA/MotB family protein [Flavobacteria bacterium MS024-2A]                                          | Bacteroidetes (Flavobacteria)           | 0 | 0 | 4 | 0 | 0 | 0 | 6  | 0 |
| <b>OmpA/MotB</b>                             | 77% identity to OmpA/MotB family protein [Flavobacteria bacterium MS024-2A]                                          | Bacteroidetes (Flavobacteria)           | 0 | 0 | 2 | 0 | 0 | 0 | 3  | 0 |
|                                              |                                                                                                                      |                                         |   |   |   |   |   |   |    |   |
| <b>Peptidoglycan-associated lipoprotein</b>  |                                                                                                                      |                                         |   |   |   |   |   |   |    |   |
| <b>Peptidoglycan-associated lipoprotein</b>  | 43% identity to Peptidoglycan-associated lipoprotein [Pal] [ <i>Marinomonas</i> sp. MED121]                          | Gammaproteobacteria (Oceanospirillales) | 0 | 0 | 3 | 0 | 0 | 0 | 13 | 0 |
|                                              |                                                                                                                      |                                         |   |   |   |   |   |   |    |   |
| <b>MotA/TolQ/ExbB proton channel protein</b> |                                                                                                                      |                                         |   |   |   |   |   |   |    |   |
| <b>MotA/TolQ/ExbB</b>                        | 100% identity to MotA/TolQ/ExbB proton channel family protein [ <i>Pseudoalteromonas haloplanktis</i> TAC125]        | Gammaproteobacteria (Alteromonadales)   | 5 | 0 | 0 | 0 | 9 | 0 | 0  | 0 |
| <b>MotA/TolQ/ExbB</b>                        | 77% identity to MotA/TolQ/ExbB proton channel family protein [gamma proteobacterium HTCC2207]                        | Gammaproteobacteria (OMG)               | 0 | 0 | 4 | 1 | 0 | 0 | 6  | 1 |
| <b>MotA/TolQ/ExbB</b>                        | 77% identity to MotA/TolQ/ExbB proton channel family protein [gamma proteobacterium HTCC2207]                        | Gammaproteobacteria (OMG)               | 0 | 0 | 3 | 0 | 0 | 0 | 7  | 0 |
| <b>MotA/TolQ/ExbB</b>                        | 47% identity to MotA/TolQ/ExbB proton channel family protein [marine gamma proteobacterium HTCC2143]                 | Gammaproteobacteria (OMG)               | 0 | 0 | 2 | 0 | 0 | 0 | 2  | 0 |
|                                              |                                                                                                                      |                                         |   |   |   |   |   |   |    |   |
| <b>OmpF porin</b>                            |                                                                                                                      |                                         |   |   |   |   |   |   |    |   |
| <b>OmpF</b>                                  | 99% identity to Outer membrane protein F [OmpF] [ <i>Escherichia coli</i> (strain K12)] (likely contaminant)         | Gammaproteobacteria (Enterobacteriales) | 2 | 1 | 0 | 0 | 2 | 1 | 0  | 0 |

|                                                                                |                                                                                                                                                                                                                                                                                                                        |                                                 |   |   |   |   |   |   |    |    |
|--------------------------------------------------------------------------------|------------------------------------------------------------------------------------------------------------------------------------------------------------------------------------------------------------------------------------------------------------------------------------------------------------------------|-------------------------------------------------|---|---|---|---|---|---|----|----|
| <b>OmpF-like</b>                                                               | 70% identity to Putative uncharacterized protein [KB13_263] [beta proteobacterium KB13]                                                                                                                                                                                                                                | Betaproteobacteria (unclassified)               | 0 | 0 | 2 | 3 | 0 | 0 | 11 | 13 |
|                                                                                |                                                                                                                                                                                                                                                                                                                        |                                                 |   |   |   |   |   |   |    |    |
| <b>OmpH</b>                                                                    |                                                                                                                                                                                                                                                                                                                        |                                                 |   |   |   |   |   |   |    |    |
| <b>OmpH (outer membrane chaperone Skp)</b>                                     | 100% identity to outer membrane OmpH (chaperone Skp) [ <i>Sphingopyxis alaskensis</i> RB2256]                                                                                                                                                                                                                          | Alphaproteobacteria (Sphingomonadales)          | 2 | 0 | 0 | 0 | 4 | 0 | 0  | 0  |
|                                                                                |                                                                                                                                                                                                                                                                                                                        |                                                 |   |   |   |   |   |   |    |    |
| <b>Maltoporin</b>                                                              |                                                                                                                                                                                                                                                                                                                        |                                                 |   |   |   |   |   |   |    |    |
| <b>Maltoporin</b>                                                              | 100% identity to Maltoporin [ <i>Escherichia coli</i> 536] ( <i>likely contaminant</i> )                                                                                                                                                                                                                               | Gammaproteobacteria (Enterobacteriales)         | 0 | 3 | 0 | 0 | 0 | 3 | 0  | 0  |
|                                                                                |                                                                                                                                                                                                                                                                                                                        |                                                 |   |   |   |   |   |   |    |    |
| <b>PorA</b>                                                                    |                                                                                                                                                                                                                                                                                                                        |                                                 |   |   |   |   |   |   |    |    |
| <b>PorA outer membrane protein porin</b>                                       | 100% identity to Major outer membrane protein [ <i>Campylobacter jejuni</i> subsp. jejuni 84-25] ( <i>likely contaminant</i> )                                                                                                                                                                                         | Epsilonproteobacteria (Campylobacteriales)      | 5 | 0 | 0 | 0 | 7 | 0 | 0  | 0  |
|                                                                                |                                                                                                                                                                                                                                                                                                                        |                                                 |   |   |   |   |   |   |    |    |
| <b>Outer membrane protein assembly</b>                                         |                                                                                                                                                                                                                                                                                                                        |                                                 |   |   |   |   |   |   |    |    |
| <b>Outer membrane protein assembly complex, YaeT protein</b>                   | 46% identity to Outer membrane protein assembly complex, YaeT protein [ <i>Bermanella marisrubri</i> ]                                                                                                                                                                                                                 | Gammaproteobacteria (Oceanospirillales)         | 0 | 0 | 4 | 0 | 0 | 0 | 9  | 0  |
| <b>Outer membrane protein assembly complex, YaeT protein</b>                   | 41% identity to probable Outer membrane protein, YaeT [ <i>Oceanospirillum</i> sp. MED92]                                                                                                                                                                                                                              | Gammaproteobacteria (Oceanospirillales)         | 0 | 0 | 2 | 0 | 0 | 0 | 2  | 0  |
| <b>Outer membrane protein assembly, AsmA protein</b>                           | 100% identity to AsmA protein [ <i>Pseudoalteromonas haloplanktis</i> TAC125]                                                                                                                                                                                                                                          | Gammaproteobacteria (Alteromonadales)           | 2 | 0 | 0 | 0 | 3 | 0 | 0  | 0  |
|                                                                                |                                                                                                                                                                                                                                                                                                                        |                                                 |   |   |   |   |   |   |    |    |
|                                                                                |                                                                                                                                                                                                                                                                                                                        |                                                 |   |   |   |   |   |   |    |    |
| <b>GENERAL METABOLISM</b>                                                      |                                                                                                                                                                                                                                                                                                                        |                                                 |   |   |   |   |   |   |    |    |
| <b>Carbon fixation: 3-Hydroxypropionate/4-hydroxybutyrate cycle (archaeal)</b> |                                                                                                                                                                                                                                                                                                                        |                                                 |   |   |   |   |   |   |    |    |
| <b>Acetyl-CoA/propionyl-CoA carboxylase - Steps (1)&amp; (7)</b>               |                                                                                                                                                                                                                                                                                                                        |                                                 |   |   |   |   |   |   |    |    |
| <b>Acetyl-CoA/propionyl-CoA carboxylase (ATP-binding subunit)</b>              | 86% identity to Carbamoyl-phosphate synthase L chain ATP-binding [Nmar_0273] [ <i>Nitrosopumilus maritimus</i> (strain SCM1)]<br><i>Nmar_0273 is the homolog of Msed_0147, the protein identified as the ATP-binding subunit of Acetyl-CoA/propionyl-CoA carboxylase in Metallosphaera sedula (Berg et al., 2007).</i> | Marine Group I Crenarchaeota (Nitrosopumilales) | 0 | 0 | 0 | 2 | 0 | 0 | 0  | 4  |





|                                                      |                                                                                                                                                                                                                                                                                                                                                                                              |                                                 |   |   |   |    |   |   |   |    |
|------------------------------------------------------|----------------------------------------------------------------------------------------------------------------------------------------------------------------------------------------------------------------------------------------------------------------------------------------------------------------------------------------------------------------------------------------------|-------------------------------------------------|---|---|---|----|---|---|---|----|
| <b>Acryloyl-CoA reductase</b>                        | 81% identity to Alcohol dehydrogenase zinc-binding domain protein [Nmar_1622] [ <i>Nitrosopumilus maritimus</i> (strain SCM1)] <i>Nmar_1622 is a homolog of Msed_1426, the protein identified as acryloyl-CoA reductase in M. sedula (Berg et al., 2007).</i>                                                                                                                                | Marine Group I Crenarchaeota (Nitrosopumilales) | 0 | 0 | 0 | 2  | 0 | 0 | 0 | 9  |
| <b>Acryloyl-CoA reductase</b>                        | 80% identity to Alcohol dehydrogenase zinc-binding domain protein [Nmar_1622] [ <i>Nitrosopumilus maritimus</i> (strain SCM1)]                                                                                                                                                                                                                                                               | Marine Group I Crenarchaeota (Nitrosopumilales) | 0 | 0 | 0 | 11 | 0 | 0 | 0 | 45 |
| <b>Acryloyl-CoA reductase?</b>                       | 82% identity to Alcohol dehydrogenase GroES domain protein [Nmar_0523] [ <i>Nitrosopumilus maritimus</i> (strain SCM1)] <i>Nmar_0523 is a homolog of Msed_1426, the protein identified as acryloyl-CoA reductase in M. sedula (Berg et al., 2007).</i>                                                                                                                                       | Marine Group I Crenarchaeota (Nitrosopumilales) | 0 | 0 | 0 | 4  | 0 | 0 | 0 | 11 |
|                                                      |                                                                                                                                                                                                                                                                                                                                                                                              |                                                 |   |   |   |    |   |   |   |    |
| <b>Methylmalonyl-CoA mutase - Step (9)</b>           |                                                                                                                                                                                                                                                                                                                                                                                              |                                                 |   |   |   |    |   |   |   |    |
| <b>Methylmalonyl-CoA mutase, large subunit</b>       | 87% identity to Methylmalonyl-CoA mutase, large subunit [Nmar_0954] [ <i>Nitrosopumilus maritimus</i> (strain SCM1)] <i>Nmar_0954 is the homolog of Msed_0638, the protein identified as the large subunit of methylmalonyl-CoA mutase in M. sedula (Berg et al., 2007).</i>                                                                                                                 | Marine Group I Crenarchaeota (Nitrosopumilales) | 0 | 0 | 0 | 2  | 0 | 0 | 0 | 3  |
|                                                      |                                                                                                                                                                                                                                                                                                                                                                                              |                                                 |   |   |   |    |   |   |   |    |
| <b>Succinic semialdehyde reductase - Step (11)</b>   |                                                                                                                                                                                                                                                                                                                                                                                              |                                                 |   |   |   |    |   |   |   |    |
| <b>Succinic semialdehyde reductase</b>               | 90% identity to Iron-containing alcohol dehydrogenase [Nmar_1110] [ <i>Nitrosopumilus maritimus</i> (strain SCM1)] <i>In M. sedula, the enzyme responsible for this step is Msed_1424 (Berg et al., 2007; Kockelkorn &amp; Fuchs, 2009), but no obvious homolog exists in N. maritimus. Walker et al. (2010) proposed that Nmar_1110 is succinic semialdehyde reductase in N. maritimus.</i> | Marine Group I Crenarchaeota (Nitrosopumilales) | 0 | 0 | 0 | 4  | 0 | 0 | 0 | 16 |
|                                                      |                                                                                                                                                                                                                                                                                                                                                                                              |                                                 |   |   |   |    |   |   |   |    |
| <b>3-Hydroxybutyryl-CoA synthetase - Step (12)</b>   |                                                                                                                                                                                                                                                                                                                                                                                              |                                                 |   |   |   |    |   |   |   |    |
| <b>4-Hydroxybutyryl-CoA synthetase (AMP-forming)</b> | 90% identity to CoA-binding domain protein [Nmar_0206] [ <i>Nitrosopumilus maritimus</i> (strain SCM1)] <i>In M. sedula, the enzyme responsible for this step is Msed_1422 (Berg et al., 2007), but no obvious homolog exists in N. maritimus. Walker et al. (2010) proposed that Nmar_0206 is the 4-hydroxybutyryl-CoA synthetase (AMP-forming) in N. maritimus.</i>                        | Marine Group I Crenarchaeota (Nitrosopumilales) | 0 | 0 | 0 | 4  | 0 | 0 | 0 | 9  |

|                                                              |                                                                                                                                                                                                                                                                                                                                                                                                                                                                          |                                                 |   |   |   |   |   |   |   |   |
|--------------------------------------------------------------|--------------------------------------------------------------------------------------------------------------------------------------------------------------------------------------------------------------------------------------------------------------------------------------------------------------------------------------------------------------------------------------------------------------------------------------------------------------------------|-------------------------------------------------|---|---|---|---|---|---|---|---|
|                                                              |                                                                                                                                                                                                                                                                                                                                                                                                                                                                          |                                                 |   |   |   |   |   |   |   |   |
| <b>4-Hydroxybutyryl-CoA dehydratase - Step (13)</b>          |                                                                                                                                                                                                                                                                                                                                                                                                                                                                          |                                                 |   |   |   |   |   |   |   |   |
| <b>4-Hydroxybutyryl-CoA dehydratase</b>                      | 97% identity to Vinylacetyl-CoA delta-isomerase [Nmar_0207] [Nitrosopumilus maritimus (strain SCM1)] <i>Nmar_0207 is the homolog of Msed_1321, the protein identified as 4-hydroxybutyryl-CoA dehydratase in M. sedula (Berg et al., 2007; Ramos-Vera et al., 2011).</i>                                                                                                                                                                                                 | Marine Group I Crenarchaeota (Nitrosopumilales) | 0 | 2 | 0 | 0 | 0 | 4 | 0 | 0 |
| <b>4-Hydroxybutyryl-CoA dehydratase</b>                      | 91% identity to Vinylacetyl-CoA delta-isomerase [Nmar_0207] [Nitrosopumilus maritimus (strain SCM1)]                                                                                                                                                                                                                                                                                                                                                                     | Marine Group I Crenarchaeota (Nitrosopumilales) | 0 | 0 | 0 | 4 | 0 | 0 | 0 | 6 |
|                                                              |                                                                                                                                                                                                                                                                                                                                                                                                                                                                          |                                                 |   |   |   |   |   |   |   |   |
| <b>Crotonyl-CoA hydratase - Step (14)</b>                    |                                                                                                                                                                                                                                                                                                                                                                                                                                                                          |                                                 |   |   |   |   |   |   |   |   |
| <b>Crotonyl-CoA hydratase</b>                                | 100% identity to Enoyl-CoA hydratase/isomerase [Nmar_1308] [Nitrosopumilus maritimus (strain SCM1)] <i>In M. sedula, this step and the next step are catalyzed by a single bifunctional enzyme (Msed_0399), but in N. maritimus they are catalyzed by two separate steps (Ramos-Vera et al., 2011). Nmar_1308 is the homolog of the C-terminal of Msed_0399, identified as crotonyl-CoA hydratase in M. sedula (Ramos-Vera et al., 2011).</i>                            | Marine Group I Crenarchaeota (Nitrosopumilales) | 0 | 2 | 0 | 0 | 0 | 3 | 0 | 0 |
|                                                              |                                                                                                                                                                                                                                                                                                                                                                                                                                                                          |                                                 |   |   |   |   |   |   |   |   |
| <b>3-Hydroxybutyryl-CoA dehydrogenase (NAD+) - Step (15)</b> |                                                                                                                                                                                                                                                                                                                                                                                                                                                                          |                                                 |   |   |   |   |   |   |   |   |
| <b>3-Hydroxybutyryl-CoA dehydrogenase (NAD+)</b>             | 87% identity to 3-Hydroxybutyryl-CoA dehydrogenase [Nmar_1028] [Nitrosopumilus maritimus (strain SCM1)] <i>In M. sedula, this step and the previous step are catalyzed by a single bifunctional enzyme (Msed_0399), but in N. maritimus they are catalyzed by two separate steps (Ramos-Vera et al., 2011). Nmar_1028 is the homolog of the N-terminal of Msed_0399, identified as 3-hydroxybutyryl-CoA dehydrogenase (NAD+) in M. sedula (Ramos-Vera et al., 2011).</i> | Marine Group I Crenarchaeota (Nitrosopumilales) | 0 | 0 | 0 | 2 | 0 | 0 | 0 | 8 |
|                                                              |                                                                                                                                                                                                                                                                                                                                                                                                                                                                          |                                                 |   |   |   |   |   |   |   |   |
| <b>Acetoacetyl-CoA beta-ketothiolase - Step (16)</b>         |                                                                                                                                                                                                                                                                                                                                                                                                                                                                          |                                                 |   |   |   |   |   |   |   |   |
| <b>Acetoacetyl-CoA beta-ketothiolase</b>                     | 88% identity to Propanoyl-CoA C-acyltransferase [Nmar_1631] [Nitrosopumilus maritimus (strain SCM1)] <i>Nmar_1631 is the homolog of Msed_0656, the protein identified as</i>                                                                                                                                                                                                                                                                                             | Marine Group I Crenarchaeota (Nitrosopumilales) | 0 | 0 | 0 | 4 | 0 | 0 | 0 | 9 |

|                                                          |                                                                                                                      |                                                 |   |   |   |   |   |   |   |    |  |
|----------------------------------------------------------|----------------------------------------------------------------------------------------------------------------------|-------------------------------------------------|---|---|---|---|---|---|---|----|--|
|                                                          | <i>a possible candidate for acetoacetyl-CoA beta-ketothiolase in M. sedula (Berg et al., 2007).</i>                  |                                                 |   |   |   |   |   |   |   |    |  |
| <b>Carbon fixation: Reverse tricarboxylic acid cycle</b> |                                                                                                                      |                                                 |   |   |   |   |   |   |   |    |  |
| <b>Pyruvate:ferredoxin oxidoreductase (EC 1.2.7.1)</b>   |                                                                                                                      |                                                 |   |   |   |   |   |   |   |    |  |
| <b>Pyruvate:ferredoxin oxidoreductase, gamma subunit</b> | 100% identity to Pyruvate:ferredoxin oxidoreductase gamma subunit [PorG] [ <i>Candidatus</i> Leptospirillum rubarum] | Nitrospirae                                     | 0 | 2 | 0 | 0 | 0 | 3 | 0 | 0  |  |
| <b>Krebs cycle</b>                                       |                                                                                                                      |                                                 |   |   |   |   |   |   |   |    |  |
| <b>Aconitate hydratase (EC 4.2.1.3)</b>                  |                                                                                                                      |                                                 |   |   |   |   |   |   |   |    |  |
| <b>Aconitate hydratase</b>                               | 100% identity to Aconitate hydratase [AcnA] [ <i>Candidatus</i> Pelagibacter ubique HTCC1062]                        | Alphaproteobacteria (SAR11 cluster)             | 0 | 2 | 0 | 0 | 0 | 2 | 0 | 0  |  |
| <b>Aconitate hydratase</b>                               | 100% identity to aconitate hydratase 1 [AcnA] [ <i>Sphingopyxis alaskensis</i> RB2256]                               | Alphaproteobacteria (Sphingomonadales)          | 2 | 0 | 0 | 0 | 2 | 0 | 0 | 0  |  |
| <b>Aconitate hydratase</b>                               | 100% identity to Aconitate hydratase 2 [AcnB] [ <i>Pseudoalteromonas haloplanktis</i> (strain TAC 125)]              | Gammaproteobacteria (Alteromonadales)           | 4 | 1 | 0 | 0 | 6 | 1 | 0 | 0  |  |
| <b>Aconitate hydratase</b>                               | 100% identity to Aconitate hydratase [AcnA] [ <i>Moritella</i> sp. PE36],                                            | Gammaproteobacteria (Alteromonadales)           | 2 | 0 | 0 | 0 | 5 | 0 | 0 | 0  |  |
| <b>Aconitate hydratase</b>                               | 74% identity to Aconitate hydratase 2 [AcnB] [ <i>Pseudomonas mendocina</i> (strain ymp)]                            | Gammaproteobacteria (Pseudomonadales)           | 0 | 0 | 2 | 0 | 0 | 0 | 3 | 0  |  |
| <b>Aconitate hydratase</b>                               | 85% identity to Aconitate hydratase [AcnA] [Nmar_1482] [ <i>Nitrosopumilus maritimus</i> (strain SCM1)]              | Marine Group I Crenarchaeota (Nitrosopumilales) | 0 | 0 | 0 | 6 | 0 | 0 | 0 | 13 |  |
| <b>Isocitrate dehydrogenase (EC 1.1.1.41)</b>            |                                                                                                                      |                                                 |   |   |   |   |   |   |   |    |  |
| <b>Isocitrate dehydrogenase</b>                          | 93% identity to Isocitrate dehydrogenase (NAD(+)) [Icd] [Nmar_1379] [ <i>Nitrosopumilus maritimus</i> (strain SCM1)] | Marine Group I Crenarchaeota (Nitrosopumilales) | 0 | 0 | 0 | 2 | 0 | 0 | 0 | 3  |  |
| <b>Succinyl-CoA synthetase (EC 6.2.1.5)</b>              |                                                                                                                      |                                                 |   |   |   |   |   |   |   |    |  |
| <b>Succinyl-CoA synthetase, beta subunit</b>             | 100% identity to Succinyl-CoA synthetase, beta subunit [SucC] [ <i>Sphingopyxis alaskensis</i> RB2256]               | Alphaproteobacteria (Sphingomonadales)          | 5 | 0 | 0 | 0 | 6 | 0 | 0 | 0  |  |
| <b>Succinyl-CoA synthetase, beta subunit</b>             | 100% identity to Succinyl-CoA synthetase, beta subunit [SucC] [ <i>Pseudoalteromonas haloplanktis</i> TAC125]        | Gammaproteobacteria (Alteromonadales)           | 3 | 0 | 0 | 0 | 9 | 0 | 0 | 0  |  |

|                                                                         |                                                                                                                                                         |                                                                 |   |   |   |   |   |   |   |    |
|-------------------------------------------------------------------------|---------------------------------------------------------------------------------------------------------------------------------------------------------|-----------------------------------------------------------------|---|---|---|---|---|---|---|----|
| <b>Succinyl-CoA synthetase, beta subunit</b>                            | 79% identity to Succinyl-CoA synthetase, beta subunit [SucC] [ <i>Neptuniibacter caesariensis</i> ]                                                     | Gammaproteobacteria (Oceanospirillales)                         | 0 | 0 | 3 | 0 | 0 | 0 | 3 | 0  |
| <b>Succinyl-CoA synthetase, alpha subunit</b>                           | 91% identity to Succinyl-CoA synthetase, alpha subunit [SucD] [Nmar_1124] [ <i>Nitrosopumilus maritimus</i> (strain SCM1)]                              | Marine Group I Crenarchaeota (Nitrosopumilales)                 | 0 | 0 | 0 | 7 | 0 | 0 | 0 | 18 |
| <b>Succinyl-CoA synthetase, beta subunit</b>                            | 92% identity to Succinyl-CoA synthetase, beta subunit [SucC] [Nmar_1123] [ <i>Nitrosopumilus maritimus</i> (strain SCM1)]                               | Marine Group I Crenarchaeota (Nitrosopumilales)                 | 0 | 0 | 0 | 6 | 0 | 0 | 0 | 15 |
|                                                                         |                                                                                                                                                         |                                                                 |   |   |   |   |   |   |   |    |
| <b>Succinate dehydrogenase (EC 1.3.99.1)</b>                            |                                                                                                                                                         |                                                                 |   |   |   |   |   |   |   |    |
| <b>Succinate dehydrogenase/fumarate reductase, flavoprotein subunit</b> | 97% identity to Succinate dehydrogenase or fumarate reductase, flavoprotein subunit [SdhA] [Nmar_0258] [ <i>Nitrosopumilus maritimus</i> (strain SCM1)] | Marine Group I Crenarchaeota (Nitrosopumilales)                 | 0 | 2 | 0 | 0 | 0 | 5 | 0 | 0  |
|                                                                         |                                                                                                                                                         |                                                                 |   |   |   |   |   |   |   |    |
| <b>Malate dehydrogenase (EC 1.1.1.37)</b>                               |                                                                                                                                                         |                                                                 |   |   |   |   |   |   |   |    |
| <b>Malate dehydrogenase</b>                                             | 97% identity to Malate dehydrogenase [Mdh] [ <i>Candidatus Pelagibacter ubique</i> HTCC1002]                                                            | Alphaproteobacteria (SAR11 cluster)                             | 0 | 0 | 3 | 4 | 0 | 0 | 6 | 10 |
| <b>Malate dehydrogenase</b>                                             | 100% identity to malate dehydrogenase [Mdh] [Alteromonadales bacterium TW-7]                                                                            | Gammaproteobacteria (Alteromonadales)                           | 3 | 0 | 0 | 0 | 5 | 0 | 0 | 0  |
| <b>Malate dehydrogenase</b>                                             | 52% identity to Malate dehydrogenase [Mdh] [gamma proteobacterium NOR51-B]                                                                              | Gammaproteobacteria (OMG)                                       | 0 | 0 | 2 | 0 | 0 | 0 | 2 | 0  |
| <b>Malate dehydrogenase</b>                                             | 71% identity to Malate dehydrogenase [Mdh] [ <i>Proteus mirabilis</i> (strain HI4320)]                                                                  | Gammaproteobacteria (Enterobacteriales)                         | 0 | 0 | 0 | 3 | 0 | 0 | 0 | 7  |
| <b>Malate dehydrogenase</b>                                             | 100% identity to Malate dehydrogenase [Mdh] [ <i>Vibrio</i> sp.]                                                                                        | Gammaproteobacteria (Vibrionales)                               | 4 | 0 | 0 | 0 | 7 | 0 | 0 | 0  |
| <b>Malate dehydrogenase</b>                                             | 85% identity to Malate dehydrogenase [Mdh] [Nmar_0338] [ <i>Nitrosopumilus maritimus</i> (strain SCM1)]                                                 | Marine Group I Crenarchaeota (Nitrosopumilales)                 | 0 | 0 | 0 | 7 | 0 | 0 | 0 | 28 |
|                                                                         |                                                                                                                                                         |                                                                 |   |   |   |   |   |   |   |    |
| <b>Glyoxylate bypass</b>                                                |                                                                                                                                                         |                                                                 |   |   |   |   |   |   |   |    |
| <b>Isocitrate lyase (EC 4.1.3.1)</b>                                    |                                                                                                                                                         |                                                                 |   |   |   |   |   |   |   |    |
| <b>Isocitrate lyase</b>                                                 | 100% identity to isocitrate lyase [AceA] [ <i>Candidatus Pelagibacter ubique</i> HTCC1062]                                                              | Alphaproteobacteria (SAR11 cluster)                             | 2 | 1 | 0 | 0 | 6 | 1 | 0 | 0  |
| <b>Isocitrate lyase</b>                                                 | 100% identity to Isocitrate lyase [AceA] [Rhodobacterales bacterium HTCC2255]                                                                           | Alphaproteobacteria (Rhodobacterales, <i>Roseobacter</i> clade) | 2 | 0 | 0 | 0 | 4 | 0 | 0 | 0  |
| <b>Isocitrate lyase</b>                                                 | 83% identity to Isocitrate lyase [AceA] [ <i>Colwellia psychrerythraea</i> (strain 34H /ATCC BAA-681)]                                                  | Gammaproteobacteria (Alteromonadales)                           | 0 | 0 | 2 | 0 | 0 | 0 | 3 | 0  |

|                                                        |                                                                                                                             |                                                 |   |   |   |   |   |   |    |   |
|--------------------------------------------------------|-----------------------------------------------------------------------------------------------------------------------------|-------------------------------------------------|---|---|---|---|---|---|----|---|
| <b>Isocitrate lyase</b>                                | 100% identity to Isocitrate lyase [AceA] [ <i>Pseudomonas stutzeri</i> A1501]                                               | Gammaproteobacteria (Pseudomonadales)           | 2 | 0 | 0 | 0 | 3 | 0 | 0  | 0 |
| <b>Isocitrate lyase</b>                                | 82% identity to Isocitrate lyase [AceA] [Rmag_0538] [ <i>Candidatus Ruthia magnifica</i> ]                                  | Gammaproteobacteria (GSO-EOSA-1)                | 0 | 0 | 0 | 2 | 0 | 0 | 0  | 5 |
| <b>Isocitrate lyase</b>                                | 83% identity to Isocitrate lyase [AceA] [ <i>Neptuniibacter caesariensis</i> ]                                              | Gammaproteobacteria (Oceanospirillales)         | 0 | 0 | 2 | 2 | 0 | 0 | 9  | 2 |
|                                                        |                                                                                                                             |                                                 |   |   |   |   |   |   |    |   |
| <b>Malate synthase (EC 2.3.3.9)</b>                    |                                                                                                                             |                                                 |   |   |   |   |   |   |    |   |
| <b>Malate synthase</b>                                 | 58% identity to Malate synthase [AceB] [ <i>Hahella chejuensis</i> (strain KCTC 2396)]                                      | Gammaproteobacteria (Oceanospirillales)         | 0 | 0 | 4 | 2 | 0 | 0 | 10 | 4 |
|                                                        |                                                                                                                             |                                                 |   |   |   |   |   |   |    |   |
| <b>Glycolysis/Gluconeogenesis</b>                      |                                                                                                                             |                                                 |   |   |   |   |   |   |    |   |
| <b>Phosphoenolpyruvate synthase (EC 2.7.9.2)</b>       |                                                                                                                             |                                                 |   |   |   |   |   |   |    |   |
| <b>Phosphoenolpyruvate synthase</b>                    | 71% identity to Phosphoenolpyruvate synthase [PpsA] [ <i>Pseudomonas fluorescens</i> (strain Pf-5 / ATCC BAA-477)]          | Gammaproteobacteria (Pseudomonadales)           | 0 | 0 | 0 | 2 | 0 | 0 | 0  | 2 |
|                                                        |                                                                                                                             |                                                 |   |   |   |   |   |   |    |   |
| <b>Phosphoenolpyruvate carboxykinase (EC 4.1.1.49)</b> |                                                                                                                             |                                                 |   |   |   |   |   |   |    |   |
| <b>Phosphoenolpyruvate carboxykinase</b>               | 73% identity to Phosphoenolpyruvate carboxykinase (ATP) [PckA] [ <i>Hahella chejuensis</i> (strain KCTC 2396)]              | Gammaproteobacteria (Oceanospirillales)         | 0 | 0 | 2 | 0 | 0 | 0 | 3  | 0 |
| <b>Phosphoenolpyruvate carboxykinase</b>               | 100% identity to Phosphoenolpyruvate carboxykinase (ATP) [PckA] [ <i>Moritella</i> sp. PE36].                               | Gammaproteobacteria (Alteromonadales)           | 2 | 0 | 0 | 0 | 2 | 0 | 0  | 0 |
| <b>Phosphoenolpyruvate carboxykinase</b>               | 94% identity to Phosphoenolpyruvate carboxykinase (ATP) [PckA] [Nmar_0392] [ <i>Nitrosopumilus maritimus</i> (strain SCM1)] | Marine Group I Crenarchaeota (Nitrosopumilales) | 0 | 0 | 0 | 2 | 0 | 0 | 0  | 3 |
|                                                        |                                                                                                                             |                                                 |   |   |   |   |   |   |    |   |
| <b>Enolase (EC 4.2.1.11)</b>                           |                                                                                                                             |                                                 |   |   |   |   |   |   |    |   |
| <b>Enolase</b>                                         | 100% identity to Enolase [Eno] [ <i>Psychromonas ingrahamii</i> 37]                                                         | Gammaproteobacteria (Alteromonadales)           | 3 | 1 | 0 | 0 | 8 | 2 | 0  | 0 |
| <b>Enolase</b>                                         | 84% identity to Enolase [Eno] [Nmar_0317] [ <i>Nitrosopumilus maritimus</i> (strain SCM1)]                                  | Marine Group I Crenarchaeota (Nitrosopumilales) | 0 | 0 | 0 | 4 | 0 | 0 | 0  | 7 |
|                                                        |                                                                                                                             |                                                 |   |   |   |   |   |   |    |   |
| <b>Phosphoglycerate mutase (EC 5.4.2.1)</b>            |                                                                                                                             |                                                 |   |   |   |   |   |   |    |   |
| <b>Phosphoglycerate mutase</b>                         | 75% identity to Phosphoglycerate mutase [ApgM] [Nmar_0537] [ <i>Nitrosopumilus maritimus</i> (strain SCM1)]                 | Marine Group I Crenarchaeota (Nitrosopumilales) | 0 | 0 | 0 | 3 | 0 | 0 | 0  | 6 |

|                                                               |                                                                                                                      |                                                 |   |   |   |   |   |    |   |   |   |
|---------------------------------------------------------------|----------------------------------------------------------------------------------------------------------------------|-------------------------------------------------|---|---|---|---|---|----|---|---|---|
|                                                               |                                                                                                                      |                                                 |   |   |   |   |   |    |   |   |   |
| <b>Glyceraldehyde-3-phosphate dehydrogenase (EC 1.2.1.12)</b> |                                                                                                                      |                                                 |   |   |   |   |   |    |   |   |   |
| <b>Glyceraldehyde-3-phosphate dehydrogenase</b>               | 81% identity to Glyceraldehyde-3-phosphate dehydrogenase [GapA] [Rmag_0063] [ <i>Candidatus Ruthia magnifica</i> ]   | Gamma proteobacteria (GSO-EOSA-1)               | 0 | 0 | 0 | 3 | 0 | 0  | 0 | 0 | 7 |
| <b>Glyceraldehyde-3-phosphate dehydrogenase</b>               | 100% identity to Glyceraldehyde-3-phosphate dehydrogenase, type I [GapA] [ <i>Vibrio harveyi</i> HY01],              | Gamma proteobacteria (Vibrionales)              | 2 | 0 | 0 | 0 | 3 | 0  | 0 | 0 | 0 |
| <b>Glyceraldehyde 3-phosphate dehydrogenase</b>               | 100% identity to Glyceraldehyde 3-phosphate dehydrogenase [GapA] [ <i>Moritella</i> sp. PE36]                        | Gamma proteobacteria (Alteromonadales)          | 2 | 0 | 0 | 0 | 2 | 0  | 0 | 0 | 0 |
|                                                               |                                                                                                                      |                                                 |   |   |   |   |   |    |   |   |   |
| <b>Fructose-1,6-bisphosphate aldolase (EC 4.1.2.13)</b>       |                                                                                                                      |                                                 |   |   |   |   |   |    |   |   |   |
| <b>Fructose-1,6-bisphosphate aldolase</b>                     | 74% identity to Fructose-bisphosphate aldolase [Fda] [ <i>Prochlorococcus marinus</i> str. MIT 9202]                 | Cyanobacteria                                   | 0 | 0 | 0 | 4 | 0 | 0  | 0 | 0 | 7 |
|                                                               |                                                                                                                      |                                                 |   |   |   |   |   |    |   |   |   |
| <b>Fructose-1,6-bisphosphatase (EC 3.1.3.11)</b>              |                                                                                                                      |                                                 |   |   |   |   |   |    |   |   |   |
| <b>Fructose 1,6-bisphosphatase type II</b>                    | 100% identity to Fructose 1,6-bisphosphatase II [GlpX] [ <i>Sphingopyxis alaskensis</i> RB2256]                      | Alphaproteobacteria (Sphingomonadales)          | 3 | 0 | 0 | 0 | 3 | 0  | 0 | 0 | 0 |
| <b>Fructose-1,6-bisphosphatase type V (archaeal)</b>          | 88% identity to Fructose-1,6-bisphosphatase type V [Nmar_1035] [ <i>Nitrosopumilus maritimus</i> (strain SCM1)]      | Marine Group I Crenarchaeota (Nitrosopumilales) | 0 | 3 | 0 | 0 | 0 | 6  | 0 | 0 | 0 |
|                                                               |                                                                                                                      |                                                 |   |   |   |   |   |    |   |   |   |
| <b>Glycerol kinase (EC 2..7.1.30)</b>                         |                                                                                                                      |                                                 |   |   |   |   |   |    |   |   |   |
| <b>Glycerol kinase</b>                                        | 100% identity to Glycerol kinase (GlpK) [ <i>Shigella flexneri</i> 5 str. 8401]                                      | Gamma proteobacteria (Enterobacteriales)        | 0 | 2 | 0 | 0 | 0 | 2  | 0 | 0 | 0 |
|                                                               |                                                                                                                      |                                                 |   |   |   |   |   |    |   |   |   |
| <b>Transketolase (EC 2.2.1.1.)</b>                            |                                                                                                                      |                                                 |   |   |   |   |   |    |   |   |   |
| <b>Transketolase</b>                                          | 76% identity to Transketolase [TktA] [Rmag_0062] [ <i>Candidatus Ruthia magnifica</i> ]                              | Gamma proteobacteria (GSO-EOSA-1)               | 0 | 0 | 0 | 3 | 0 | 0  | 0 | 0 | 4 |
|                                                               |                                                                                                                      |                                                 |   |   |   |   |   |    |   |   |   |
| <b>NITROGEN &amp; AMINO ACID METABOLISM</b>                   |                                                                                                                      |                                                 |   |   |   |   |   |    |   |   |   |
| <b>Ammonia monooxygenase (EC 1.14.99.39)</b>                  |                                                                                                                      |                                                 |   |   |   |   |   |    |   |   |   |
| <b>Ammonia monooxygenase, subunit B</b>                       | 100% identity to Ammonia monooxygenase subunit B [AmoB] [ <i>Nitrosospira</i> sp. NpAV]                              | Betaproteobacteria (Nitrosomonadales)           | 0 | 2 | 0 | 0 | 0 | 13 | 0 | 0 | 0 |
| <b>Ammonia monooxygenase subunit B</b>                        | 100% identity to Ammonia monooxygenase subunit B [AmoB] [Nmar_1503] [ <i>Nitrosopumilus maritimus</i> (strain SCM1)] | Marine Group I Crenarchaeota (Nitrosopumilales) | 0 | 1 | 0 | 2 | 0 | 8  | 0 | 0 | 6 |

|                                              |                                                                                                                                      |                                                                 |   |   |   |   |   |    |   |    |
|----------------------------------------------|--------------------------------------------------------------------------------------------------------------------------------------|-----------------------------------------------------------------|---|---|---|---|---|----|---|----|
| <b>Ammonia monooxygenase subunit B</b>       | 100% identity to Ammonia monooxygenase subunit B [AmoB] [ <i>Cenarchaeum symbiosum</i> A]                                            | Marine Group I Crenarchaeota (Nitrosopumilales)                 | 0 | 0 | 0 | 2 | 0 | 0  | 0 | 7  |
|                                              |                                                                                                                                      |                                                                 |   |   |   |   |   |    |   |    |
| <b>Nitrite oxidoreductase (EC 1.7.99.4)</b>  |                                                                                                                                      |                                                                 |   |   |   |   |   |    |   |    |
| <b>Nitrite oxidoreductase, alpha subunit</b> | 68% identity to Nitrite oxidoreductase alpha subunit [NxrA] ([ <i>Candidatus Nitrospira defluvii</i> ])                              | Nitrospirae                                                     | 0 | 0 | 0 | 2 | 0 | 0  | 0 | 2  |
| <b>Nitrite oxidoreductase, alpha subunit</b> | 78% identity to Nitrite oxidoreductase, alpha subunit [NarG] ([ <i>Candidatus Kuenenia stuttgartiensis</i> ])                        | Planctomycetes                                                  | 0 | 0 | 0 | 2 | 0 | 0  | 0 | 3  |
|                                              |                                                                                                                                      |                                                                 |   |   |   |   |   |    |   |    |
| <b>Glutamate dehydrogenase (EC 1.4.1.3)</b>  |                                                                                                                                      |                                                                 |   |   |   |   |   |    |   |    |
| <b>Glutamate dehydrogenase</b>               | 89% identity to Glutamate dehydrogenase [GdhA] [Nmar_1312] [ <i>Nitrosopumilus maritimus</i> (strain SCM1)]                          | Marine Group I Crenarchaeota (Nitrosopumilales)                 | 0 | 0 | 0 | 8 | 0 | 0  | 0 | 20 |
| <b>Glutamate dehydrogenase</b>               | 91% identity to Glutamate dehydrogenase [GdhA] [Nmar_1312] [ <i>Nitrosopumilus maritimus</i> (strain SCM1)]                          | Marine Group I Crenarchaeota (Nitrosopumilales)                 | 0 | 0 | 0 | 3 | 0 | 0  | 0 | 14 |
|                                              |                                                                                                                                      |                                                                 |   |   |   |   |   |    |   |    |
| <b>Glutamate synthase (EC 6.3.1.2)</b>       |                                                                                                                                      |                                                                 |   |   |   |   |   |    |   |    |
| <b>Glutamate synthase, large subunit</b>     | 62% identity to Glutamate synthase large subunit [GltA] [ <i>Candidatus Pelagibacter</i> sp. HTCC7211]                               | Alphaproteobacteria (SAR11 cluster)                             | 0 | 0 | 0 | 3 | 0 | 0  | 0 | 6  |
| <b>Glutamate synthase, small subunit</b>     | 70% identity to Glutamine amidotransferase [GltB] [ <i>Candidatus Pelagibacter</i> ubique HTCC1062]                                  | Alphaproteobacteria (SAR11 cluster)                             | 0 | 0 | 1 | 2 | 0 | 0  | 2 | 14 |
| <b>Glutamate synthase, small subunit</b>     | 100% identity to to Glutamine amidotransferase [GltB] [ <i>Candidatus Pelagibacter</i> ubique HTCC1002]                              | Alphaproteobacteria (SAR11 cluster)                             | 2 | 0 | 0 | 0 | 2 | 0  | 0 | 0  |
| <b>Glutamate synthase, small subunit</b>     | 59% identity to Glutamine amidotransferase [GltB] (GXGXG motif-containing protein) [ <i>Candidatus Pelagibacter</i> ubique HTCC1002] | Alphaproteobacteria (SAR11 cluster)                             | 0 | 0 | 1 | 7 | 0 | 0  | 3 | 45 |
| <b>Glutamate synthase, small subunit</b>     | 71% identity to Glutamine amidotransferase [GltB] (GXGXG motif-containing protein) [ <i>Roseovarius nubinhibens</i> ISM]             | Alphaproteobacteria (Rhodobacterales, <i>Roseobacter</i> clade) | 0 | 0 | 2 | 1 | 0 | 0  | 4 | 1  |
| <b>Glutamate synthase, large subunit</b>     | 100% identity to Glutamate synthase large subunit [GltA] [ <i>Roseobacter</i> sp. AzwK-3b],                                          | Alphaproteobacteria (Rhodobacterales, <i>Roseobacter</i> clade) | 3 | 2 | 0 | 0 | 7 | 13 | 0 | 0  |
|                                              |                                                                                                                                      |                                                                 |   |   |   |   |   |    |   |    |
| <b>Glutamine synthetase (EC 6.3.1.2)</b>     |                                                                                                                                      |                                                                 |   |   |   |   |   |    |   |    |
| <b>Glutamine synthetase</b>                  | 72% identity to GlnT-like protein [ <i>Candidatus Pelagibacter</i> ubique HTCC1002]                                                  | Alphaproteobacteria (SAR11 cluster)                             | 0 | 0 | 0 | 9 | 0 | 0  | 0 | 38 |

|                                                        |                                                                                                                                                |                                                 |   |   |   |   |   |   |    |    |
|--------------------------------------------------------|------------------------------------------------------------------------------------------------------------------------------------------------|-------------------------------------------------|---|---|---|---|---|---|----|----|
| <b>Glutamine synthetase</b>                            | 74% identity to GlnT-like protein [ <i>Candidatus Pelagibacter ubique</i> HTCC1062]                                                            | Alphaproteobacteria (SAR11 cluster)             | 0 | 0 | 3 | 3 | 0 | 0 | 7  | 5  |
| <b>Glutamine synthetase</b>                            | 90% identity to Glutamine synthetase [GlnA] [ <i>Candidatus Pelagibacter ubique</i> HTCC1002]                                                  | Alphaproteobacteria (SAR11 cluster)             | 0 | 0 | 3 | 2 | 0 | 0 | 5  | 4  |
| <b>Glutamine synthetase</b>                            | 100% identity to Glutamine synthetase, type I [GlnA] [ <i>Thalassobium</i> sp. R2A62]                                                          | Alphaproteobacteria (Rhodobacterales)           | 2 | 0 | 0 | 0 | 2 | 0 | 0  | 0  |
| <b>Glutamine synthetase</b>                            | 63% identity to Glutamine synthetase, type III [Snov_0455] [ <i>Starkeya novella</i> DSM 506]                                                  | Alphaproteobacteria (Rhizobiales)               | 0 | 0 | 0 | 2 | 0 | 0 | 0  | 2  |
| <b>Glutamine synthetase</b>                            | 80% identity to Glutamine synthetase [MED121_09298] [ <i>Marinomonas</i> sp. MED121]                                                           | Gammaproteobacteria (Oceanospirillales)         | 0 | 0 | 8 | 0 | 0 | 0 | 25 | 0  |
| <b>Glutamine synthetase</b>                            | 81% identity to Glutamine synthetase [Rmag_0498] [ <i>Candidatus Ruthia magnifica</i> ]                                                        | Gammaproteobacteria (GSO-EOSA-1)                | 0 | 0 | 0 | 2 | 0 | 0 | 0  | 2  |
|                                                        |                                                                                                                                                |                                                 |   |   |   |   |   |   |    |    |
| <b>Carbamoyl phosphate synthase (EC 6.3.5.5)</b>       |                                                                                                                                                |                                                 |   |   |   |   |   |   |    |    |
| <b>Carbamoyl phosphate synthase, large subunit</b>     | 100% identity to Carbamoyl phosphate synthase large subunit [CarB] [ <i>Sphingopyxis alaskensis</i> RB2256]                                    | Alphaproteobacteria (Sphingomonadales)          | 3 | 0 | 0 | 0 | 3 | 0 | 0  | 0  |
|                                                        |                                                                                                                                                |                                                 |   |   |   |   |   |   |    |    |
| <b>Nitrogen regulatory protein P-II</b>                |                                                                                                                                                |                                                 |   |   |   |   |   |   |    |    |
| <b>Nitrogen regulatory protein P-II</b>                | 100% identity to Nitrogen regulatory protein P-II 2 [ <i>Pseudomonas aeruginosa</i> PAO1]                                                      | Gammaproteobacteria (Pseudomonadales)           | 2 | 0 | 2 | 0 | 6 | 0 | 8  | 0  |
|                                                        |                                                                                                                                                |                                                 |   |   |   |   |   |   |    |    |
| <b>Aspartate aminotransferase (EC 2.6.1.1)</b>         |                                                                                                                                                |                                                 |   |   |   |   |   |   |    |    |
| <b>Aspartate aminotransferase</b>                      | 93% identity to Aspartate transaminase [AspC] [ <i>Candidatus Pelagibacter ubique</i> HTCC1002]                                                | Alphaproteobacteria (SAR11 cluster)             | 0 | 0 | 1 | 2 | 0 | 0 | 1  | 3  |
| <b>Aspartate aminotransferase</b>                      | 72% identity to Aminotransferase: putative aspartate aminotransferase [AspC] [Rmag_0425] [ <i>Candidatus Ruthia magnifica</i> ]                | Gammaproteobacteria (GSO-EOSA-1)                | 0 | 0 | 0 | 3 | 0 | 0 | 0  | 3  |
|                                                        |                                                                                                                                                |                                                 |   |   |   |   |   |   |    |    |
| <b>Serine-pyruvate aminotransferase (EC 2.6.1.51)</b>  |                                                                                                                                                |                                                 |   |   |   |   |   |   |    |    |
| <b>Serine-pyruvate aminotransferase</b>                | 70% identity to Serine--pyruvate transaminase [Agxt] [Nmar_1731] [ <i>Nitrosopumilus maritimus</i> (strain SCM1)]                              | Marine Group I Crenarchaeota (Nitrosopumilales) | 0 | 0 | 0 | 9 | 0 | 0 | 0  | 37 |
|                                                        |                                                                                                                                                |                                                 |   |   |   |   |   |   |    |    |
| <b>Taurine-pyruvate aminotransferase (EC 2.6.1.77)</b> |                                                                                                                                                |                                                 |   |   |   |   |   |   |    |    |
| <b>Taurine-pyruvate aminotransferase</b>               | 88% identity to Class III aminotransferase: possibly taurine-pyruvate aminotransferase [Tpa] [ <i>Candidatus Pelagibacter ubique</i> HTCC1002] | Alphaproteobacteria (SAR11 cluster)             | 0 | 0 | 1 | 2 | 0 | 0 | 3  | 6  |





|                                                                |                                                                                                                                  |                                                 |   |   |   |   |   |   |    |    |
|----------------------------------------------------------------|----------------------------------------------------------------------------------------------------------------------------------|-------------------------------------------------|---|---|---|---|---|---|----|----|
| <b>Glycine cleavage system, L-protein</b>                      | 68% identity to Dihydropolyl dehydrogenase [Lpd] [ <i>Neptuniibacter caesariensis</i> ]                                          | Gammaproteobacteria (Oceanospirillales)         | 0 | 0 | 2 | 0 | 0 | 0 | 3  | 0  |
|                                                                |                                                                                                                                  |                                                 |   |   |   |   |   |   |    |    |
| <b>Ketol-acid reductoisomerase (EC 1.1.1.86)</b>               |                                                                                                                                  |                                                 |   |   |   |   |   |   |    |    |
| <b>Ketol-acid reductoisomerase</b>                             | 93% identity to Ketol-acid reductoisomerase [IlvC] [ <i>Candidatus Pelagibacter ubique</i> HTCC1062]                             | Alphaproteobacteria (SAR11 cluster)             | 1 | 1 | 1 | 2 | 1 | 2 | 1  | 4  |
| <b>Ketol-acid reductoisomerase</b>                             | 100% identity to Ketol-acid reductoisomerase [ <i>Sphingopyxis alaskensis</i> RB2256]                                            | Alphaproteobacteria (Sphingomonadales)          | 2 | 0 | 0 | 0 | 2 | 0 | 0  | 0  |
| <b>Ketol-acid reductoisomerase</b>                             | 93% identity to Ketol-acid reductoisomerase [IlvC] [ <i>Candidatus Ruthia magnifica</i> ]                                        | Gammaproteobacteria (GSO-EOSA-1)                | 0 | 0 | 0 | 2 | 0 | 0 | 0  | 10 |
| <b>Ketol-acid reductoisomerase</b>                             | 90% identity to Ketol-acid reductoisomerase [IlvC] [ <i>Nitrosopumilus maritimus</i> (strain SCM1)]                              | Marine Group I Crenarchaeota (Nitrosopumilales) | 0 | 0 | 0 | 4 | 0 | 0 | 0  | 21 |
|                                                                |                                                                                                                                  |                                                 |   |   |   |   |   |   |    |    |
| <b>Dihydroxy-acid dehydrogenase (EC 4.2.1.9)</b>               |                                                                                                                                  |                                                 |   |   |   |   |   |   |    |    |
| <b>Dihydroxy-acid dehydratase</b>                              | 97% identity to Dihydroxy-acid dehydratase [IlvD] [ <i>Candidatus Pelagibacter ubique</i> HTCC1062]                              | Alphaproteobacteria (SAR11 cluster)             | 1 | 2 | 0 | 0 | 1 | 2 | 0  | 0  |
|                                                                |                                                                                                                                  |                                                 |   |   |   |   |   |   |    |    |
| <b>Acetolactate synthase (EC 2.2.1.6)</b>                      |                                                                                                                                  |                                                 |   |   |   |   |   |   |    |    |
| <b>Acetolactate synthase</b>                                   | 79% identity to Acetolactate synthase, large subunit [IlvI] [Rmag_0445] [ <i>Candidatus Ruthia magnifica</i> ]                   | Gammaproteobacteria (GSO-EOSA-1)                | 0 | 0 | 0 | 2 | 0 | 0 | 0  | 2  |
| <b>Acetolactate synthase</b>                                   | 86% identity to Acetolactate synthase [IlvI] [Nmar_1072] [ <i>Nitrosopumilus maritimus</i> (strain SCM1)]                        | Marine Group I Crenarchaeota (Nitrosopumilales) | 0 | 2 | 0 | 0 | 0 | 2 | 0  | 0  |
|                                                                |                                                                                                                                  |                                                 |   |   |   |   |   |   |    |    |
| <b>3-Isopropylmalate dehydrogenase (EC 1.1.1.85)</b>           |                                                                                                                                  |                                                 |   |   |   |   |   |   |    |    |
| <b>3-Isopropylmalate dehydrogenase</b>                         | 86% identity to 3-Isopropylmalate dehydrogenase [LeuB] [ <i>Candidatus Pelagibacter ubique</i> HTCC1062]                         | Alphaproteobacteria (SAR11 cluster)             | 0 | 0 | 2 | 1 | 0 | 0 | 2  | 1  |
|                                                                |                                                                                                                                  |                                                 |   |   |   |   |   |   |    |    |
| <b>Methylmalonate-semialdehyde dehydrogenase (EC 1.2.1.27)</b> |                                                                                                                                  |                                                 |   |   |   |   |   |   |    |    |
| <b>Methylmalonate-semialdehyde dehydrogenase</b>               | 74% identity to Methylmalonate-semialdehyde dehydrogenase [MmsA] [ <i>Colwellia psychrerythraea</i> (strain 34H / ATCC BAA-681)] | Gammaproteobacteria (Alteromonadales)           | 0 | 0 | 3 | 0 | 0 | 0 | 13 | 0  |
| <b>Methylmalonate-semialdehyde dehydrogenase</b>               | 72% identity to Methylmalonate-semialdehyde dehydrogenase [MmsA] [ <i>Colwellia psychrerythraea</i> 34H]                         | Gammaproteobacteria (Alteromonadales)           | 0 | 0 | 2 | 0 | 0 | 0 | 3  | 0  |







|                                                                  |                                                                                                                                                                                    |                                                 |   |   |   |   |    |    |   |    |
|------------------------------------------------------------------|------------------------------------------------------------------------------------------------------------------------------------------------------------------------------------|-------------------------------------------------|---|---|---|---|----|----|---|----|
| <b>Iron-sulfur assembly protein</b>                              |                                                                                                                                                                                    |                                                 |   |   |   |   |    |    |   |    |
| <b>FeS assembly protein</b>                                      | 82% identity to FeS assembly protein SufD [Nmar_0496] [ <i>Nitrosopumilus maritimus</i> (strain SCM1)]                                                                             | Marine Group I Crenarchaeota (Nitrosopumilales) | 0 | 0 | 0 | 6 | 0  | 0  | 0 | 12 |
| <b>FeS assembly protein</b>                                      | 90% identity to FeS assembly protein SufB [Nmar_0495] [ <i>Nitrosopumilus maritimus</i> (strain SCM1)]                                                                             | Marine Group I Crenarchaeota (Nitrosopumilales) | 0 | 0 | 0 | 6 | 0  | 0  | 0 | 14 |
| <b>FeS assembly protein</b>                                      | 88% identity to FeS assembly ATPase SufC [Nmar_0516] [ <i>Nitrosopumilus maritimus</i> (strain SCM1)]                                                                              | Marine Group I Crenarchaeota (Nitrosopumilales) | 0 | 0 | 0 | 6 | 0  | 0  | 0 | 12 |
|                                                                  |                                                                                                                                                                                    |                                                 |   |   |   |   |    |    |   |    |
| <b>Methanesulfonate monooxygenase, hydroxylase</b>               |                                                                                                                                                                                    |                                                 |   |   |   |   |    |    |   |    |
| <b>Methanesulfonate monooxygenase, hydroxylase alpha subunit</b> | 67% identity to Methanesulfonate monooxygenase, hydroxylase alpha subunit [MsmA] [Rieske (2Fe-2S) domain protein] [ <i>Methylobacterium nodulans</i> (strain ORS2060 / LMG 21967)] | Alphaproteobacteria (Rhizobiales)               | 0 | 0 | 2 | 0 | 0  | 0  | 3 | 0  |
|                                                                  |                                                                                                                                                                                    |                                                 |   |   |   |   |    |    |   |    |
|                                                                  |                                                                                                                                                                                    |                                                 |   |   |   |   |    |    |   |    |
| <b>OTHER CARBON METABOLISM</b>                                   |                                                                                                                                                                                    |                                                 |   |   |   |   |    |    |   |    |
| <b>One-carbon metabolism</b>                                     |                                                                                                                                                                                    |                                                 |   |   |   |   |    |    |   |    |
| <b>Sarcosine oxidase (EC 1.5.3.1)</b>                            |                                                                                                                                                                                    |                                                 |   |   |   |   |    |    |   |    |
| <b>Sarcosine oxidase</b>                                         | 59% identity to Putative monomeric sarcosine oxidase [SoxA] [ <i>Candidatus Pelagibacter ubique</i> HTCC1002]                                                                      | Alphaproteobacteria (SAR11 cluster)             | 0 | 0 | 0 | 2 | 0  | 0  | 0 | 4  |
| <b>Sarcosine oxidase, alpha subunit</b>                          | 43% identity to Sarcosine oxidase subunit alpha [SoxA] [ <i>Rhodobacter capsulatus</i> SB 1003]                                                                                    | Alphaproteobacteria (Rhodobacterales)           | 0 | 0 | 2 | 0 | 0  | 0  | 3 | 0  |
| <b>Sarcosine oxidase</b>                                         | 69% identity to Putative monomeric sarcosine oxidase [SoxA] [marine gamma proteobacterium HTCC2148]                                                                                | Gamma proteobacteria (OMG)                      | 0 | 0 | 2 | 1 | 0  | 0  | 6 | 2  |
|                                                                  |                                                                                                                                                                                    |                                                 |   |   |   |   |    |    |   |    |
| <b>Dimethylglycine dehydrogenase (EC 1.5.99.2)</b>               |                                                                                                                                                                                    |                                                 |   |   |   |   |    |    |   |    |
| <b>Dimethylglycine dehydrogenase</b>                             | 93% identity to Dimethylglycine dehydrogenase [Dmg] [ <i>Candidatus Pelagibacter ubique</i> HTCC1002]                                                                              | Alphaproteobacteria (SAR11 cluster)             | 0 | 0 | 3 | 2 | 0  | 0  | 3 | 4  |
|                                                                  |                                                                                                                                                                                    |                                                 |   |   |   |   |    |    |   |    |
| <b>Methanol dehydrogenase (EC. 1.1.99.8)</b>                     |                                                                                                                                                                                    |                                                 |   |   |   |   |    |    |   |    |
| <b>Methanol dehydrogenase, large subunit</b>                     | 100% identity to Methanol dehydrogenase large subunit [MxaF] [Methylophilales bacterium                                                                                            | Betaproteobacteria (Methylophilales,            | 8 | 8 | 0 | 0 | 25 | 38 | 0 | 0  |

|                                                     |                                                                                                                                 |                                                                 |   |   |   |    |   |   |    |    |  |
|-----------------------------------------------------|---------------------------------------------------------------------------------------------------------------------------------|-----------------------------------------------------------------|---|---|---|----|---|---|----|----|--|
|                                                     | HTCC2181]                                                                                                                       | OM43 clade)                                                     |   |   |   |    |   |   |    |    |  |
| <b>Methanol dehydrogenase, large subunit</b>        | 96% identity to Methanol dehydrogenase large subunit [MxaF] [Methylophilales bacterium HTCC2181]                                | Betaproteobacteria (Methylophilales, OM43 clade)                | 0 | 0 | 2 | 4  | 0 | 0 | 14 | 15 |  |
|                                                     |                                                                                                                                 |                                                                 |   |   |   |    |   |   |    |    |  |
| <b>Formate dehydrogenase (EC 1.2.1.2)</b>           |                                                                                                                                 |                                                                 |   |   |   |    |   |   |    |    |  |
| <b>Formate dehydrogenase, beta subunit</b>          | 84% identity to Formate dehydrogenase, beta subunit [FdhB] [ <i>Candidatus</i> Pelagibacter ubique HTCC1002]                    | Alphaproteobacteria (SAR11 cluster)                             | 0 | 0 | 1 | 2  | 0 | 0 | 1  | 3  |  |
| <b>Formate dehydrogenase, beta subunit</b>          | 56% identity to Formate dehydrogenase, beta subunit [FdhB] [ <i>Candidatus</i> Pelagibacter ubique HTCC1002]                    | Alphaproteobacteria (SAR11 cluster)                             | 0 | 0 | 0 | 2  | 0 | 0 | 0  | 2  |  |
| <b>Formate dehydrogenase, alpha subunit</b>         | 100% identity to Formate dehydrogenase, alpha subunit [FdhA] [ <i>Ruegeria pomeroyi</i> DSS-3]                                  | Alphaproteobacteria (Rhodobacterales, <i>Roseobacter</i> clade) | 0 | 0 | 1 | 2  | 0 | 0 | 1  | 6  |  |
| <b>Formate dehydrogenase, alpha subunit</b>         | 100% identity to Formate dehydrogenase, alpha subunit [FdhA] [Rhodobacterales bacterium HTCC2083]                               | Alphaproteobacteria (Rhodobacterales, <i>Roseobacter</i> clade) | 3 | 3 | 0 | 0  | 5 | 8 | 0  | 0  |  |
|                                                     |                                                                                                                                 |                                                                 |   |   |   |    |   |   |    |    |  |
| <b>Formate tetrahydrofolate ligase (EC 6.3.4.3)</b> |                                                                                                                                 |                                                                 |   |   |   |    |   |   |    |    |  |
| <b>Formate--tetrahydrofolate ligase</b>             | 97% identity to Formate--tetrahydrofolate ligase [Fhs] [ <i>Candidatus</i> Pelagibacter ubique TCC1062]                         | Alphaproteobacteria (SAR11 cluster)                             | 0 | 0 | 4 | 4  | 0 | 0 | 7  | 8  |  |
| <b>Formate--tetrahydrofolate ligase</b>             | 67% identity to Formate--tetrahydrofolate ligase [Fhs] [ <i>Roseobacter</i> sp. SK209-2-6]                                      | Alphaproteobacteria (Rhodobacterales, <i>Roseobacter</i> clade) | 0 | 0 | 2 | 12 | 0 | 0 | 2  | 29 |  |
| <b>Formate--tetrahydrofolate ligase</b>             | 63% identity to Formate--tetrahydrofolate ligase [Fhs] [ <i>Methylocella silvestris</i> (strain BL2 / DSM 15510 / NCIMB 13906)] | Alphaproteobacteria (Rhizobiales)                               | 0 | 0 | 6 | 4  | 0 | 0 | 22 | 8  |  |
| <b>Formate--tetrahydrofolate ligase</b>             | 60% identity to Formate--tetrahydrofolate ligase [Fhs] [ <i>Methylocella silvestris</i> (strain BL2 / DSM 15510 / NCIMB 13906)] | Alphaproteobacteria (Rhizobiales)                               | 0 | 0 | 2 | 0  | 0 | 0 | 4  | 0  |  |
|                                                     |                                                                                                                                 |                                                                 |   |   |   |    |   |   |    |    |  |
| <b>Formamidase (EC 3.5.1.49)</b>                    |                                                                                                                                 |                                                                 |   |   |   |    |   |   |    |    |  |
| <b>Formamidase</b>                                  | 61% identity to Formamidase [FmdA] [ <i>Synechococcus</i> sp. PCC 7335]                                                         | Cyanobacteria                                                   | 0 | 0 | 0 | 2  | 0 | 0 | 0  | 2  |  |
|                                                     |                                                                                                                                 |                                                                 |   |   |   |    |   |   |    |    |  |
| <b>Dimethylformamidase (EC 3.5.1.56)</b>            |                                                                                                                                 |                                                                 |   |   |   |    |   |   |    |    |  |
| <b>N,N-dimethylformamidase, large subunit</b>       | 40% identity to Large subunit of N,N-dimethylformamidase [ <i>Methylobacterium chloromethanicum</i> (strain CM4 / NCIMB 13688)] | Alphaproteobacteria (Rhizobiales)                               | 0 | 0 | 0 | 2  | 0 | 0 | 0  | 9  |  |





|                                                         |                                                                                                                                            |                                                 |   |   |   |   |   |   |   |    |
|---------------------------------------------------------|--------------------------------------------------------------------------------------------------------------------------------------------|-------------------------------------------------|---|---|---|---|---|---|---|----|
| <b>Fatty oxidation complex, alpha subunit</b>           | 100% identity to Fatty oxidation complex, alpha subunit [FadB] [ <i>Moritella</i> sp. PE36]                                                | Gammaproteobacteria (Alteromonadales)           | 3 | 0 | 0 | 0 | 5 | 0 | 0 | 0  |
|                                                         |                                                                                                                                            |                                                 |   |   |   |   |   |   |   |    |
| <i>Long chain fatty acid-coA ligase</i>                 |                                                                                                                                            |                                                 |   |   |   |   |   |   |   |    |
| <b>Long-chain-fatty-acid--CoA ligase</b>                | 48% identity to Long-chain-fatty-acid--CoA ligase [FadD] [ <i>Shewanella violacea</i> (strain JCM 10179 / CIP 106290 / LMG 19151 / DSS12)] | Gammaproteobacteria (Alteromonadales)           | 0 | 0 | 0 | 7 | 0 | 0 | 0 | 14 |
|                                                         |                                                                                                                                            |                                                 |   |   |   |   |   |   |   |    |
| <i>3-Oxoacyl-[acyl-carrier-protein] synthase</i>        |                                                                                                                                            |                                                 |   |   |   |   |   |   |   |    |
| <b>3-oxoacyl-[acyl-carrier-protein] synthase</b>        | 100% identity to 3-oxoacyl-[acyl-carrier-protein] synthase [FabB] [ <i>Candidatus Pelagibacter ubique</i> HTCC1062]                        | Alphaproteobacteria (SAR11 cluster)             | 2 | 1 | 0 | 0 | 4 | 5 | 0 | 0  |
|                                                         |                                                                                                                                            |                                                 |   |   |   |   |   |   |   |    |
| <i>Enoyl-[acyl-carrier-protein] reductase</i>           |                                                                                                                                            |                                                 |   |   |   |   |   |   |   |    |
| <b>Enoyl-[acyl-carrier-protein] reductase</b>           | 96% identity to Enoyl-[acyl-carrier-protein] reductase (NADH2) [FabI] [ <i>Candidatus Pelagibacter ubique</i> HTCC1062]                    | Alphaproteobacteria (SAR11 cluster)             | 0 | 0 | 4 | 3 | 0 | 0 | 5 | 6  |
|                                                         |                                                                                                                                            |                                                 |   |   |   |   |   |   |   |    |
| <i>Acetyl-CoA C-acetyltransferase</i>                   |                                                                                                                                            |                                                 |   |   |   |   |   |   |   |    |
| <b>Acetyl-CoA C-acetyltransferase</b>                   | 100% identity to Acetyl-CoA C-acetyltransferase [AtoB] [ <i>Sphingopyxis alaskensis</i> RB2256]                                            | Alphaproteobacteria (Sphingomonadales)          | 3 | 0 | 0 | 0 | 3 | 0 | 0 | 0  |
|                                                         |                                                                                                                                            |                                                 |   |   |   |   |   |   |   |    |
| <i>Trans-hexaprenyltranstransferase (EC 2.5.1.30)</i>   |                                                                                                                                            |                                                 |   |   |   |   |   |   |   |    |
| <b>Trans-hexaprenyltranstransferase</b>                 | 100% identity to Trans-hexaprenyltranstransferase [HepT] [ <i>Sphingopyxis alaskensis</i> RB2256]                                          | Alphaproteobacteria (Sphingomonadales)          | 3 | 0 | 0 | 0 | 3 | 0 | 0 | 0  |
|                                                         |                                                                                                                                            |                                                 |   |   |   |   |   |   |   |    |
| <i>Hydroxymethylglutaryl-CoA synthase (EC 2.3.3.10)</i> |                                                                                                                                            |                                                 |   |   |   |   |   |   |   |    |
| <b>Hydroxymethylglutaryl-CoA synthase</b>               | 100% identity to Hydroxymethylglutaryl-CoA synthase [HmgS] [Nmar_0828] [ <i>Nitrosopumilus maritimus</i> (strain SCM1)]                    | Marine Group I Crenarchaeota (Nitrosopumilales) | 0 | 0 | 0 | 2 | 0 | 0 | 0 | 4  |
|                                                         |                                                                                                                                            |                                                 |   |   |   |   |   |   |   |    |
| <b>Nucleotide metabolism</b>                            |                                                                                                                                            |                                                 |   |   |   |   |   |   |   |    |
| <i>Adenosylhomocysteinase (EC 3.3.1.1)</i>              |                                                                                                                                            |                                                 |   |   |   |   |   |   |   |    |
| <b>Adenosylhomocysteinase</b>                           | 100% identity to Adenosylhomocysteinase [AhcY] [ <i>Candidatus Pelagibacter ubique</i> HTCC1062]                                           | Alphaproteobacteria (SAR11 cluster)             | 2 | 2 | 0 | 0 | 2 | 5 | 0 | 0  |

|                                                              |                                                                                                            |                                                 |   |   |   |    |   |   |   |    |
|--------------------------------------------------------------|------------------------------------------------------------------------------------------------------------|-------------------------------------------------|---|---|---|----|---|---|---|----|
| <b>Adenosylhomocysteinase</b>                                | 100% identity to Adenosylhomocysteinase [AhcY] [ <i>Saccharophagus degradans</i> 2-40]                     | Gamma proteobacteria (Alteromonadales)          | 2 | 0 | 0 | 0  | 3 | 0 | 0 | 0  |
| <b>Adenosylhomocysteinase</b>                                | 75% identity to Adenosylhomocysteinase [AhcY] [Rmag_0739] [ <i>Candidatus Ruthia magnifica</i> ]           | Gamma proteobacteria (GSO-EOSA-1)               | 0 | 0 | 2 | 4  | 0 | 0 | 2 | 8  |
| <b>Adenosylhomocysteinase</b>                                | 100% identity to Adenosylhomocysteinase [AhcY] [ <i>Candidatus Vesicomysocius okutanii</i> HA]             | Gamma proteobacteria (GSO-EOSA-1)               | 1 | 2 | 0 | 0  | 1 | 2 | 0 | 0  |
| <b>Adenosylhomocysteinase</b>                                | 75% identity to Adenosylhomocysteinase [AhcY] [Rmag_0739] [ <i>Candidatus Ruthia magnifica</i> ]           | Gamma proteobacteria (GSO-EOSA-1)               | 0 | 0 | 1 | 2  | 0 | 0 | 1 | 4  |
| <b>Adenosylhomocysteinase</b>                                | 100% identity to Adenosylhomocysteinase [AhcY] [ <i>Sphingopyxis alaskensis</i> RB2256]                    | Alphaproteobacteria (Sphingomonadales)          | 2 | 0 | 0 | 0  | 2 | 0 | 0 | 0  |
| <b>Adenosylhomocysteinase</b>                                | 100% identity to Adenosylhomocysteinase [AhcY] [ <i>Erythrobacter</i> sp. SD-21]                           | Alphaproteobacteria (Sphingomonadales)          | 2 | 1 | 0 | 0  | 2 | 4 | 0 | 0  |
| <b>Adenosylhomocysteinase</b>                                | 86% identity to Adenosylhomocysteinase [AhcY] [Nmar_0964] [ <i>Nitrosopumilus maritimus</i> (strain SCM1)] | Marine Group I Crenarchaeota (Nitrosopumilales) | 0 | 0 | 0 | 10 | 0 | 0 | 0 | 42 |
| <b>Adenosylhomocysteinase</b>                                | 89% identity to Adenosylhomocysteinase [AhcY] [Nmar_0964] [ <i>Nitrosopumilus maritimus</i> (strain SCM1)] | Marine Group I Crenarchaeota (Nitrosopumilales) | 0 | 0 | 0 | 3  | 0 | 0 | 0 | 14 |
|                                                              |                                                                                                            |                                                 |   |   |   |    |   |   |   |    |
| <b>Adenylosuccinate synthetase (EC 6.3.4.4)</b>              |                                                                                                            |                                                 |   |   |   |    |   |   |   |    |
| <b>Adenylosuccinate synthetase</b>                           | 100% to Adenylosuccinate synthetase [PurA] [Nmar_1420] [ <i>Nitrosopumilus maritimus</i> (strain SCM1)]    | Marine Group I Crenarchaeota (Nitrosopumilales) | 0 | 2 | 0 | 2  | 0 | 7 | 0 | 10 |
|                                                              |                                                                                                            |                                                 |   |   |   |    |   |   |   |    |
| <b>Adenylosuccinate lyase (EC 4.3.2.2)</b>                   |                                                                                                            |                                                 |   |   |   |    |   |   |   |    |
| <b>Adenylosuccinate lyase</b>                                | 100% identity to Adenylosuccinate lyase [PurB] [ <i>Candidatus Pelagibacter ubique</i> HTCC1062]           | Alphaproteobacteria (SAR11 cluster)             | 0 | 2 | 0 | 0  | 0 | 5 | 0 | 0  |
| <b>Adenylosuccinate lyase</b>                                | 100% identity to adenylosuccinate lyase [PurB] [ <i>Sphingopyxis alaskensis</i> RB2256]                    | Alphaproteobacteria (Sphingomonadales)          | 3 | 0 | 0 | 0  | 3 | 0 | 0 | 0  |
| <b>Adenylosuccinate lyase</b>                                | 87% identity to Adenylosuccinate lyase [PurB] [Nmar_1455] [ <i>Nitrosopumilus maritimus</i> (strain SCM1)] | Marine Group I Crenarchaeota (Nitrosopumilales) | 0 | 0 | 0 | 2  | 0 | 0 | 0 | 2  |
|                                                              |                                                                                                            |                                                 |   |   |   |    |   |   |   |    |
| <b>Inosine-5'-monophosphate dehydrogenase (EC 1.1.1.205)</b> |                                                                                                            |                                                 |   |   |   |    |   |   |   |    |
| <b>Inosine-5'-monophosphate dehydrogenase</b>                | 100% identity to Inosine-5'-monophosphate dehydrogenase [GuaB] [ <i>Sphingopyxis alaskensis</i> RB2256]    | Alphaproteobacteria (Sphingomonadales)          | 2 | 0 | 0 | 0  | 2 | 0 | 0 | 0  |
| <b>Inosine-5'-monophosphate dehydrogenase</b>                | 81% identity to Inosine-5'-monophosphate dehydrogenase [GuaB] [Nmar_1569]                                  | Marine Group I Crenarchaeota                    | 0 | 0 | 0 | 3  | 0 | 0 | 0 | 5  |

|                                                           |                                                                                                                         |                                                                 |   |   |   |   |   |   |    |    |  |
|-----------------------------------------------------------|-------------------------------------------------------------------------------------------------------------------------|-----------------------------------------------------------------|---|---|---|---|---|---|----|----|--|
|                                                           | [ <i>Nitrosopumilus maritimus</i> (strain SCM1)]                                                                        | (Nitrosopumilales)                                              |   |   |   |   |   |   |    |    |  |
|                                                           |                                                                                                                         |                                                                 |   |   |   |   |   |   |    |    |  |
| <b>Myo-inositol-1-phosphate synthase (EC 5.5.1.4)</b>     |                                                                                                                         |                                                                 |   |   |   |   |   |   |    |    |  |
| <b>Myo-inositol-1-phosphate synthase</b>                  | 85% identity to Myo-inositol-1-phosphate synthase [Ino1] [Nmar_0649] [ <i>Nitrosopumilus maritimus</i> (strain SCM1)]   | Marine Group I Crenarchaeota (Nitrosopumilales)                 | 0 | 0 | 0 | 7 | 0 | 0 | 0  | 16 |  |
|                                                           |                                                                                                                         |                                                                 |   |   |   |   |   |   |    |    |  |
| <b>Pseudouridylate synthase (EC 4.2.1.70)</b>             |                                                                                                                         |                                                                 |   |   |   |   |   |   |    |    |  |
| <b>Pseudouridylate synthase</b>                           | 87% identity to Pseudouridylate synthase [TruB] [Nmar_0406] [ <i>Nitrosopumilus maritimus</i> (strain SCM1)]            | Marine Group I Crenarchaeota (Nitrosopumilales)                 | 0 | 0 | 0 | 3 | 0 | 0 | 0  | 4  |  |
|                                                           |                                                                                                                         |                                                                 |   |   |   |   |   |   |    |    |  |
| <b>Ribonucleoside-diphosphate reductase (EC 1.17.4.1)</b> |                                                                                                                         |                                                                 |   |   |   |   |   |   |    |    |  |
| <b>Ribonucleoside-diphosphate reductase</b>               | 87% identity to Ribonucleoside-diphosphate reductase [Rnr] [Nmar_1627] [ <i>Nitrosopumilus maritimus</i> (strain SCM1)] | Marine Group I Crenarchaeota (Nitrosopumilales)                 | 0 | 0 | 0 | 8 | 0 | 0 | 0  | 24 |  |
|                                                           |                                                                                                                         |                                                                 |   |   |   |   |   |   |    |    |  |
| <b>Nucleoside diphosphate kinase (EC 2.7.4.6)</b>         |                                                                                                                         |                                                                 |   |   |   |   |   |   |    |    |  |
| <b>Nucleoside diphosphate kinase</b>                      | 82% identity to Nucleoside diphosphate kinase [NdK] [ <i>Pseudomonas fluorescens</i> Pf-5]                              | Gamma proteobacteria (Pseudomonadales)                          | 0 | 0 | 2 | 0 | 0 | 0 | 5  | 0  |  |
|                                                           |                                                                                                                         |                                                                 |   |   |   |   |   |   |    |    |  |
| <b>5-Nucleotidase (EC 3.1.3.5)</b>                        |                                                                                                                         |                                                                 |   |   |   |   |   |   |    |    |  |
| <b>5-Nucleotidase</b>                                     | 62% identity to 5-Nucleotidase (5'-ribonucleotide phosphohydrolase) [UshA] [ <i>Ruegeria pomeroyi</i> ]                 | Alphaproteobacteria (Rhodobacterales, <i>Roseobacter</i> clade) | 0 | 0 | 0 | 7 | 0 | 0 | 0  | 10 |  |
|                                                           |                                                                                                                         |                                                                 |   |   |   |   |   |   |    |    |  |
| <b>Alcohol &amp; Aldehyde metabolism</b>                  |                                                                                                                         |                                                                 |   |   |   |   |   |   |    |    |  |
| <b>Acetaldehyde dehydrogenase (EC 1.2.1.3)</b>            |                                                                                                                         |                                                                 |   |   |   |   |   |   |    |    |  |
| <b>Acetaldehyde dehydrogenase</b>                         | 93% identity to Acetaldehyde dehydrogenase II (ACDH-II) [AldA] [ <i>Candidatus Pelagibacter ubique</i> HTCC1062]        | Alphaproteobacteria (SAR11 cluster)                             | 0 | 0 | 5 | 6 | 0 | 0 | 24 | 54 |  |
|                                                           |                                                                                                                         |                                                                 |   |   |   |   |   |   |    |    |  |
| <b>Lactaldehyde dehydrogenase (EC 1.2.1.22)</b>           |                                                                                                                         |                                                                 |   |   |   |   |   |   |    |    |  |
| <b>Lactaldehyde dehydrogenase</b>                         | 97% identity to Lactaldehyde dehydrogenase [AldA] [ <i>Escherichia coli</i> (strain K12)] ( <i>likely contaminant</i> ) | Gamma proteobacteria (Enterobacteriales)                        | 0 | 2 | 0 | 0 | 0 | 2 | 0  | 0  |  |

|                                                                |                                                                                                                             |                                                                 |   |   |   |   |   |   |   |    |  |
|----------------------------------------------------------------|-----------------------------------------------------------------------------------------------------------------------------|-----------------------------------------------------------------|---|---|---|---|---|---|---|----|--|
|                                                                |                                                                                                                             |                                                                 |   |   |   |   |   |   |   |    |  |
| <b>Aldehyde dehydrogenase (EC 1.2.1.3)</b>                     |                                                                                                                             |                                                                 |   |   |   |   |   |   |   |    |  |
| <b>Aldehyde dehydrogenase</b>                                  | 100% identity to Aldehyde dehydrogenase (NAD) [AldH] [ <i>Candidatus</i> Pelagibacter ubique HTCC1002]                      | Alphaproteobacteria (SAR11 cluster)                             | 0 | 2 | 0 | 0 | 0 | 5 | 0 | 0  |  |
| <b>Aldehyde dehydrogenase</b>                                  | 100% identity to Aldehyde dehydrogenase [AldH] [Rhodobacterales bacterium HTCC2255]                                         | Alphaproteobacteria (Rhodobacterales, <i>Roseobacter</i> clade) | 2 | 1 | 0 | 0 | 2 | 1 | 0 | 0  |  |
|                                                                |                                                                                                                             |                                                                 |   |   |   |   |   |   |   |    |  |
| <b>Alcohol dehydrogenase (EC 1.1.1.1)</b>                      |                                                                                                                             |                                                                 |   |   |   |   |   |   |   |    |  |
| <b>Alcohol dehydrogenase</b>                                   | 97% identity to Zinc-binding alcohol dehydrogenase [YhdH] [ <i>Candidatus</i> Pelagibacter ubique HTCC1002]                 | Alphaproteobacteria (SAR11 cluster)                             | 0 | 0 | 1 | 6 | 0 | 0 | 1 | 13 |  |
|                                                                |                                                                                                                             |                                                                 |   |   |   |   |   |   |   |    |  |
| <b>Short chain dehydrogenase</b>                               |                                                                                                                             |                                                                 |   |   |   |   |   |   |   |    |  |
| <b>Short chain dehydrogenase</b>                               | 79% identity to Short chain dehydrogenase [YdfG] [ <i>Candidatus</i> Pelagibacter ubique HTCC1002]                          | Alphaproteobacteria (SAR11 cluster)                             | 0 | 0 | 2 | 0 | 0 | 0 | 2 | 0  |  |
| <b>Short-chain dehydrogenase/reductase SDR</b>                 | 80% identity to Short-chain dehydrogenase/reductase SDR [YdfG] [Nmar_1786] [ <i>Nitrosopumilus maritimus</i> (strain SCM1)] | Marine Group I Crenarchaeota (Nitrosopumilales)                 | 0 | 0 | 0 | 2 | 0 | 0 | 0 | 3  |  |
|                                                                |                                                                                                                             |                                                                 |   |   |   |   |   |   |   |    |  |
| <b>Aromatic compound degradation</b>                           |                                                                                                                             |                                                                 |   |   |   |   |   |   |   |    |  |
| <b>Mandelate dehydrogenase (EC 1.1.99.31)</b>                  |                                                                                                                             |                                                                 |   |   |   |   |   |   |   |    |  |
| <b>L(+)-mandelate dehydrogenase</b>                            | 53% identity to L(+)-mandelate dehydrogenase [MdlB] [ <i>Candidatus</i> Pelagibacter sp. HTCC7211]                          | Alphaproteobacteria (SAR11 cluster)                             | 0 | 0 | 2 | 0 | 0 | 0 | 2 | 0  |  |
|                                                                |                                                                                                                             |                                                                 |   |   |   |   |   |   |   |    |  |
| <b>Phenylhydantoinase (EC 3.5.2.-)</b>                         |                                                                                                                             |                                                                 |   |   |   |   |   |   |   |    |  |
| <b>Phenylhydantoinase</b>                                      | 72% identity to Phenylhydantoinase [HyuA] [ <i>Colwellia psychrerythraea</i> 34H]                                           | Gammaproteobacteria (Alteromonadales)                           | 0 | 0 | 2 | 0 | 0 | 0 | 3 | 0  |  |
|                                                                |                                                                                                                             |                                                                 |   |   |   |   |   |   |   |    |  |
| <b>Lipopolysaccharide synthesis</b>                            |                                                                                                                             |                                                                 |   |   |   |   |   |   |   |    |  |
| <b>2-Dehydro-3-deoxyphosphooctonate aldolase (EC 2.5.1.55)</b> |                                                                                                                             |                                                                 |   |   |   |   |   |   |   |    |  |
| <b>2-Dehydro-3-deoxyphosphooctonate aldolase</b>               | 89% identity to 2-Dehydro-3-deoxyphosphooctonate aldolase [KdsA] [ <i>Candidatus</i> Pelagibacter ubique HTCC1062]          | Alphaproteobacteria (SAR11 cluster)                             | 0 | 0 | 3 | 1 | 0 | 0 | 4 | 1  |  |

|                                                                   |                                                                                                                                                              |                                                 |   |   |   |   |   |   |   |    |  |
|-------------------------------------------------------------------|--------------------------------------------------------------------------------------------------------------------------------------------------------------|-------------------------------------------------|---|---|---|---|---|---|---|----|--|
|                                                                   |                                                                                                                                                              |                                                 |   |   |   |   |   |   |   |    |  |
| <b>Coenzyme &amp; cofactor metabolism</b>                         |                                                                                                                                                              |                                                 |   |   |   |   |   |   |   |    |  |
| <b><i>Delta-aminolevulinic acid dehydratase (EC 4.2.1.24)</i></b> |                                                                                                                                                              |                                                 |   |   |   |   |   |   |   |    |  |
| <b>Delta-aminolevulinic acid dehydratase</b>                      | 72% identity to Delta-aminolevulinic acid dehydratase [HemB] [Rmag_0409] [ <i>Candidatus Ruthia magnifica</i> ]                                              | Gamma proteobacteria (GSO-EOSA-1)               | 0 | 0 | 0 | 2 | 0 | 0 | 0 | 2  |  |
| <b>Delta-aminolevulinic acid dehydratase</b>                      | 82% identity to Delta-aminolevulinic acid dehydratase [HemB] [Nmar_0509] [ <i>Nitrosopumilus maritimus</i> (strain SCM1)]                                    | Marine Group I Crenarchaeota (Nitrosopumilales) | 0 | 0 | 0 | 2 | 0 | 0 | 0 | 2  |  |
|                                                                   |                                                                                                                                                              |                                                 |   |   |   |   |   |   |   |    |  |
| <b><i>2-Phospho-L-lactate transferase (EC 2.7.8.28)</i></b>       |                                                                                                                                                              |                                                 |   |   |   |   |   |   |   |    |  |
| <b>2-Phospho-L-lactate transferase</b>                            | 89% identity to 2-Phospho-L-lactate transferase (CofD) (LPPG domain containing protein) [Nmar_0626] [ <i>Nitrosopumilus maritimus</i> (strain SCM1)]         | Marine Group I Crenarchaeota (Nitrosopumilales) | 0 | 0 | 0 | 9 | 0 | 0 | 0 | 57 |  |
|                                                                   |                                                                                                                                                              |                                                 |   |   |   |   |   |   |   |    |  |
| <b><i>Precorrin-3B C17-methyltransferase (EC 2.1.1.131)</i></b>   |                                                                                                                                                              |                                                 |   |   |   |   |   |   |   |    |  |
| <b>Precorrin-3B C17-methyltransferase</b>                         | 79% identity to Precorrin-3B C17-methyltransferase (Cobalamin biosynthesis CbiG protein) [CbiG] [Nmar_0082] [ <i>Nitrosopumilus maritimus</i> (strain SCM1)] | Marine Group I Crenarchaeota (Nitrosopumilales) | 0 | 0 | 0 | 2 | 0 | 0 | 0 | 4  |  |
|                                                                   |                                                                                                                                                              |                                                 |   |   |   |   |   |   |   |    |  |
| <b><i>Precorrin-2 C20-methyltransferase (EC 2.1.1.130)</i></b>    |                                                                                                                                                              |                                                 |   |   |   |   |   |   |   |    |  |
| <b>Precorrin-2 C20-methyltransferase</b>                          | 85% identity to Precorrin-2 C20-methyltransferase [CobI] [Nmar_0058] [ <i>Nitrosopumilus maritimus</i> (strain SCM1)]                                        | Marine Group I Crenarchaeota (Nitrosopumilales) | 0 | 0 | 0 | 2 | 0 | 0 | 0 | 4  |  |
|                                                                   |                                                                                                                                                              |                                                 |   |   |   |   |   |   |   |    |  |
| <b><i>Pyridoxal biosynthesis lyase</i></b>                        |                                                                                                                                                              |                                                 |   |   |   |   |   |   |   |    |  |
| <b>Pyridoxal biosynthesis lyase</b>                               | 89% identity to Pyridoxal biosynthesis lyase PdxS (Vitamin B6 biosynthesis protein) [Nmar_1479] [ <i>Nitrosopumilus maritimus</i> (strain SCM1)]             | Marine Group I Crenarchaeota (Nitrosopumilales) | 0 | 0 | 0 | 2 | 0 | 0 | 0 | 5  |  |
|                                                                   |                                                                                                                                                              |                                                 |   |   |   |   |   |   |   |    |  |
| <b><i>Phosphomethylpyrimidine synthase (EC 4.-.-.-)</i></b>       |                                                                                                                                                              |                                                 |   |   |   |   |   |   |   |    |  |
| <b>Phosphomethylpyrimidine synthase</b>                           | 82% identity to Phosphomethylpyrimidine synthase / Thiamine biosynthesis protein ThiC [ <i>Candidatus Ruthia magnifica</i> ]                                 | Gamma proteobacteria (GSO-EOSA-1)               | 0 | 0 | 0 | 3 | 0 | 0 | 0 | 4  |  |

|                                                               |                                                                                                                                          |                                                 |   |   |   |   |   |    |    |    |
|---------------------------------------------------------------|------------------------------------------------------------------------------------------------------------------------------------------|-------------------------------------------------|---|---|---|---|---|----|----|----|
|                                                               |                                                                                                                                          |                                                 |   |   |   |   |   |    |    |    |
| <b>Ribulose-1,5-biphosphate synthetase (EC 5.3.1.n2)</b>      |                                                                                                                                          |                                                 |   |   |   |   |   |    |    |    |
| <b>Ribulose-1,5-biphosphate synthetase</b>                    | 83% identity to Ribulose-1,5-biphosphate synthetase [Nmar_0678] [ <i>Nitrosopumilus maritimus</i> (strain SCM1)]                         | Marine Group I Crenarchaeota (Nitrosopumilales) | 0 | 0 | 0 | 7 | 0 | 0  | 0  | 53 |
|                                                               |                                                                                                                                          |                                                 |   |   |   |   |   |    |    |    |
| <b>Sorbose dehydrogenase (EC:1.1.1.-)</b>                     |                                                                                                                                          |                                                 |   |   |   |   |   |    |    |    |
| <b>L-sorbose dehydrogenase</b>                                | 90% identity to L-sorbose dehydrogenase [ <i>Candidatus Pelagibacter ubique</i> HTCC1002]                                                | Alphaproteobacteria (SAR11 cluster)             | 0 | 0 | 0 | 4 | 0 | 0  | 0  | 15 |
|                                                               |                                                                                                                                          |                                                 |   |   |   |   |   |    |    |    |
| <b>Ribose-phosphate pyrophosphokinase (EC 2.7.6.1)</b>        |                                                                                                                                          |                                                 |   |   |   |   |   |    |    |    |
| <b>Ribose-phosphate pyrophosphokinase</b>                     | 75% identity to Ribose-phosphate pyrophosphokinase [Prs] [Rmag_0109] [ <i>Candidatus Ruthia magnifica</i> ]                              | Gamma proteobacteria (GSO-EOSA-1)               | 0 | 0 | 0 | 3 | 0 | 0  | 0  | 5  |
|                                                               |                                                                                                                                          |                                                 |   |   |   |   |   |    |    |    |
|                                                               |                                                                                                                                          |                                                 |   |   |   |   |   |    |    |    |
| <b>PHOSPHATE METABOLISM</b>                                   |                                                                                                                                          |                                                 |   |   |   |   |   |    |    |    |
| <b>Phosphonoacetate hydrolase (EC 3.11.1.2)</b>               |                                                                                                                                          |                                                 |   |   |   |   |   |    |    |    |
| <b>Phosphonoacetate hydrolase</b>                             | 62% identity to Phosphonoacetate hydrolase [PhnA] [ <i>Alicyclophilus denitrificans</i> BC]                                              | Betaproteobacteria (Burkholderiales)            | 0 | 0 | 2 | 0 | 0 | 0  | 2  | 0  |
|                                                               |                                                                                                                                          |                                                 |   |   |   |   |   |    |    |    |
|                                                               |                                                                                                                                          |                                                 |   |   |   |   |   |    |    |    |
| <b>ENERGY CONSERVATION</b>                                    |                                                                                                                                          |                                                 |   |   |   |   |   |    |    |    |
| <b>Proteorhodopsin</b>                                        |                                                                                                                                          |                                                 |   |   |   |   |   |    |    |    |
| <b>Proteorhodopsin</b>                                        | 73% identity to Bacteriorhodopsin [ <i>Candidatus Pelagibacter ubique</i> HTCC1002]                                                      | Alphaproteobacteria (SAR11 cluster)             | 0 | 0 | 0 | 4 | 0 | 0  | 0  | 7  |
| <b>Proteorhodopsin</b>                                        | 76% identity to Bacteriorhodopsin [ <i>Candidatus Pelagibacter ubique</i> 1062]                                                          | Alphaproteobacteria (SAR11 cluster)             | 0 | 0 | 3 | 2 | 0 | 0  | 10 | 9  |
| <b>Proteorhodopsin</b>                                        | 73% identity to Bacteriorhodopsin [gamma proteobacterium HTCC2207]                                                                       | Gamma proteobacteria (OMG)                      | 0 | 0 | 2 | 2 | 0 | 0  | 10 | 3  |
|                                                               |                                                                                                                                          |                                                 |   |   |   |   |   |    |    |    |
| <b>ATP synthase (EC 3.6.3.14)</b>                             |                                                                                                                                          |                                                 |   |   |   |   |   |    |    |    |
| <b>F<sub>0</sub>F<sub>1</sub> ATP synthase, subunit alpha</b> | 100% identity to F <sub>0</sub> F <sub>1</sub> -type ATP synthase subunit alpha [AtpA] [ <i>Candidatus Pelagibacter ubique</i> HTCC1062] | Alphaproteobacteria (SAR11 cluster)             | 4 | 3 | 0 | 0 | 8 | 12 | 0  | 0  |

|                                                                 |                                                                                                                                                                               |                                                                 |    |    |    |    |    |    |    |    |
|-----------------------------------------------------------------|-------------------------------------------------------------------------------------------------------------------------------------------------------------------------------|-----------------------------------------------------------------|----|----|----|----|----|----|----|----|
| <b>F<sub>0</sub>F<sub>1</sub> ATP synthase, subunit beta</b>    | 100% identity to F <sub>0</sub> F <sub>1</sub> -type ATP synthase subunit beta [AtpD] [ <i>Candidatus Pelagibacter ubique</i> HTCC1062]                                       | Alphaproteobacteria (SAR11 cluster)                             | 12 | 11 | 0  | 0  | 75 | 62 | 0  | 0  |
| <b>F<sub>0</sub>F<sub>1</sub> ATP synthase, subunit gamma</b>   | 100% identity to F <sub>0</sub> F <sub>1</sub> -type ATP synthase subunit gamma [AtpG] [ <i>Candidatus Pelagibacter ubique</i> HTCC1062]                                      | Alphaproteobacteria (SAR11 cluster)                             | 2  | 2  | 0  | 0  | 2  | 7  | 0  | 0  |
| <b>F<sub>0</sub>F<sub>1</sub> ATP synthase, subunit beta</b>    | 100% identity to F <sub>0</sub> F <sub>1</sub> -type ATP synthase subunit beta [AtpD] [ <i>Rhodobacter sphaeroides</i> (strain ATCC 17025 / ATH 2.4.3)]                       | Alphaproteobacteria (Rhodobacterales)                           | 3  | 2  | 0  | 0  | 18 | 2  | 0  | 0  |
| <b>F<sub>0</sub>F<sub>1</sub> ATP synthase, subunit alpha</b>   | 100% identity to F <sub>0</sub> F <sub>1</sub> -type ATP synthase subunit alpha [AtpA] [ <i>Loktanella vestfoldensis</i> SKA53]                                               | Alphaproteobacteria (Rhodobacterales, <i>Roseobacter</i> clade) | 0  | 0  | 6  | 1  | 0  | 0  | 21 | 3  |
| <b>F<sub>0</sub>F<sub>1</sub> ATP synthase, subunit alpha</b>   | 92% identity to F <sub>0</sub> F <sub>1</sub> -type ATP synthase subunit alpha [AtpA] [ <i>Loktanella vestfoldensis</i> SKA53]                                                | Alphaproteobacteria (Rhodobacterales, <i>Roseobacter</i> clade) | 0  | 0  | 2  | 0  | 0  | 0  | 2  | 0  |
| <b>F<sub>0</sub>F<sub>1</sub> ATP synthase, subunit alpha</b>   | 100% identity to F <sub>0</sub> F <sub>1</sub> -type ATP synthase subunit alpha [AtpA] Rhodobacterales bacterium HTCC2255]                                                    | Alphaproteobacteria (Rhodobacterales, <i>Roseobacter</i> clade) | 0  | 0  | 2  | 0  | 0  | 0  | 2  | 0  |
| <b>F<sub>0</sub>F<sub>1</sub> ATP synthase, subunit beta</b>    | 100% identity to F <sub>0</sub> F <sub>1</sub> -type ATP synthase subunit beta [AtpD] [ <i>Oceanibulbus indolifex</i> HEL-45]                                                 | Alphaproteobacteria (Rhodobacterales)                           | 4  | 1  | 0  | 0  | 8  | 3  | 0  | 0  |
| <b>F<sub>0</sub>F<sub>1</sub> ATP synthase, subunit beta</b>    | 100% identity to F <sub>0</sub> F <sub>1</sub> -type ATP synthase subunit beta [AtpD] [ <i>Sphingomonas wittichii</i> RW1]                                                    | Alphaproteobacteria (Sphingomonadales)                          | 2  | 0  | 0  | 0  | 4  | 0  | 0  | 0  |
| <b>F<sub>0</sub>F<sub>1</sub> ATP synthase, subunit alpha</b>   | 100% identity F <sub>0</sub> F <sub>1</sub> -type to ATP synthase subunit alpha [AtpA] [ <i>Pseudoalteromonas haloplanktis</i> TAC125]                                        | Gammaproteobacteria (Alteromonadales)                           | 4  | 0  | 0  | 0  | 13 | 0  | 0  | 0  |
| <b>F<sub>0</sub>F<sub>1</sub> ATP synthase, subunit beta</b>    | 100% identity to F <sub>0</sub> F <sub>1</sub> -type ATP synthase subunit beta [AtpD] [Alteromonadales bacterium TW-7]                                                        | Gammaproteobacteria (Alteromonadales)                           | 3  | 0  | 0  | 0  | 5  | 0  | 0  | 0  |
| <b>F<sub>0</sub>F<sub>1</sub> ATP synthase, subunit alpha</b>   | 100% identity to F <sub>0</sub> F <sub>1</sub> -type ATP synthase subunit alpha [AtpA] [ <i>Moritella</i> sp. PE36]                                                           | Gammaproteobacteria (Alteromonadales)                           | 2  | 0  | 0  | 0  | 2  | 0  | 0  | 0  |
| <b>F<sub>0</sub>F<sub>1</sub> ATP synthase, subunit beta</b>    | 100% identity to F <sub>0</sub> F <sub>1</sub> -type ATP synthase subunit beta [AtpD] [ <i>Moritella</i> sp. PE36]                                                            | Gammaproteobacteria (Alteromonadales)                           | 2  | 0  | 0  | 0  | 2  | 0  | 0  | 0  |
| <b>F<sub>0</sub>F<sub>1</sub> ATP synthase, subunit beta</b>    | 84% identity to F <sub>0</sub> F <sub>1</sub> -type ATP synthase subunit beta [AtpD] [ <i>Neptuniibacter caesariensis</i> ]                                                   | Gammaproteobacteria (Oceanospirillales)                         | 0  | 0  | 21 | 11 | 0  | 0  | 68 | 27 |
| <b>F<sub>0</sub>F<sub>1</sub> ATP synthase, subunit alpha</b>   | 82% identity to F <sub>0</sub> F <sub>1</sub> -type ATP synthase subunit alpha [AtpA] [ <i>Neptuniibacter caesariensis</i> ]                                                  | Gammaproteobacteria (Oceanospirillales)                         | 0  | 0  | 21 | 7  | 0  | 0  | 69 | 15 |
| <b>F<sub>0</sub>F<sub>1</sub> ATP synthase, subunit gamma</b>   | 68% identity to F <sub>0</sub> F <sub>1</sub> -type ATP synthase subunit gamma [AtpG] [ <i>Neptuniibacter caesariensis</i> ]                                                  | Gammaproteobacteria (Oceanospirillales)                         | 0  | 0  | 4  | 1  | 0  | 0  | 9  | 4  |
| <b>F<sub>0</sub>F<sub>1</sub> ATP synthase, subunit epsilon</b> | 74% identity to F <sub>0</sub> F <sub>1</sub> -type ATP synthase subunit epsilon [AtpC] [ <i>Oceanospirillum</i> sp. MED92]                                                   | Gammaproteobacteria (Oceanospirillales)                         | 0  | 0  | 2  | 0  | 0  | 0  | 4  | 0  |
| <b>F<sub>0</sub>F<sub>1</sub> ATP synthase, subunit alpha</b>   | 100% identity to F <sub>0</sub> F <sub>1</sub> -type ATP synthase subunit alpha [AtpA] [ <i>Aeromonas hydrophila</i> subsp. <i>hydrophila</i> (strain ATCC 7966 / NCIB 9240)] | Gammaproteobacteria (Aeromonadales)                             | 2  | 0  | 0  | 0  | 5  | 0  | 0  | 0  |
| <b>F<sub>0</sub>F<sub>1</sub> ATP synthase, subunit alpha</b>   | 100% identity to F <sub>0</sub> F <sub>1</sub> -type ATP synthase, subunit alpha [AtpA] [ <i>Cellvibrio japonicus</i> Ueda107]                                                | Gammaproteobacteria (Pseudomonadales)                           | 3  | 1  | 0  | 0  | 5  | 1  | 0  | 0  |







|                                                                |                                                                                                                                              |                                                                 |   |   |   |   |   |   |   |    |
|----------------------------------------------------------------|----------------------------------------------------------------------------------------------------------------------------------------------|-----------------------------------------------------------------|---|---|---|---|---|---|---|----|
| <b>Cytochrome c oxidase subunit II</b>                         | 86% identity to Cytochrome c oxidase polypeptide II (Cytochrome aa3 subunit 2) (CoxB/CtaC) [ <i>Candidatus Pelagibacter ubique</i> HTCC1002] | Alphaproteobacteria (SAR11 cluster)                             | 0 | 0 | 2 | 0 | 0 | 0 | 2 | 0  |
| <b>Cytochrome c oxidase subunit II</b>                         | 63% identity to Cytochrome c oxidase subunit II [CoxB/CtaC] [Rmag_0034] [ <i>Candidatus Ruthia magnifica</i> ]                               | Gammaproteobacteria (GSO-EOSA-1)                                | 0 | 0 | 0 | 2 | 0 | 0 | 0 | 4  |
| <b>Electron transfer flavoprotein</b>                          |                                                                                                                                              |                                                                 |   |   |   |   |   |   |   |    |
| <b>Electron transfer flavoprotein, alpha and beta subunits</b> | 47% identity to Electron transfer flavoprotein, alpha subunit [EftA] [ <i>Oceanicaulis alexandrii</i> HTCC2633]                              | Alphaproteobacteria (Rhodobacterales)                           | 0 | 0 | 0 | 2 | 0 | 0 | 0 | 6  |
| <b>Electron transfer flavoprotein, beta subunit</b>            | 66% identity to Electron transfer flavoprotein beta-subunit [EftB] [alpha proteobacterium BAL199]                                            | Alphaproteobacteria (unclassified)                              | 0 | 0 | 2 | 0 | 0 | 0 | 3 | 0  |
| <b>Electron transfer flavoprotein, beta subunit</b>            | 100% identity to Electron transfer flavoprotein, beta subunit [EftB] [ <i>Sphingopyxis alaskensis</i> RB2256]                                | Alphaproteobacteria (Sphingomonadales)                          | 5 | 0 | 0 | 0 | 6 | 0 | 0 | 0  |
| <b>Electron transfer flavoprotein, beta subunit</b>            | 100% identity to Electron transfer flavoprotein, beta subunit [EftB] [ <i>Roseobacter</i> sp. MED193]                                        | Alphaproteobacteria (Rhodobacterales, <i>Roseobacter</i> clade) | 2 | 0 | 0 | 0 | 2 | 0 | 0 | 0  |
| <b>Ferredoxin</b>                                              |                                                                                                                                              |                                                                 |   |   |   |   |   |   |   |    |
| <b>Ferredoxin</b>                                              | 80% identity to 4Fe-4S ferredoxin iron-sulfur binding domain protein [Nmar_0443] [ <i>Nitrosopumilus maritimus</i> (strain SCM1)]            | Marine Group I Crenarchaeota (Nitrosopumilales)                 | 0 | 0 | 0 | 2 | 0 | 0 | 0 | 4  |
| <b>Ferredoxin</b>                                              | 84% identity to 4Fe-4S ferredoxin iron-sulfur binding domain protein [Nmar_0238] [ <i>Nitrosopumilus maritimus</i> (strain SCM1)]            | Marine Group I Crenarchaeota (Nitrosopumilales)                 | 0 | 0 | 0 | 2 | 0 | 0 | 0 | 3  |
| <b>Ferredoxin</b>                                              | 100% identity to 4Fe-4S ferredoxin iron-sulfur binding domain protein [Nmar_1537] [ <i>Nitrosopumilus maritimus</i> (strain SCM1)]           | Marine Group I Crenarchaeota (Nitrosopumilales)                 | 0 | 0 | 0 | 2 | 0 | 0 | 0 | 3  |
| <b>Multicopper oxidase</b>                                     |                                                                                                                                              |                                                                 |   |   |   |   |   |   |   |    |
| <b>Multicopper oxidase</b>                                     | 87% identity to Multicopper oxidase NirK-like [Nmar_1667] [ <i>Nitrosopumilus maritimus</i> (strain SCM1)]                                   | Marine Group I Crenarchaeota (Nitrosopumilales)                 | 0 | 0 | 0 | 3 | 0 | 0 | 0 | 31 |
| <b>Multicopper oxidase</b>                                     | 34% identity to Multicopper oxidase type 3 [ <i>Ruminococcus</i> sp. 5_1_39BFAA]                                                             | Firmicutes (Clostridia)                                         | 0 | 0 | 0 | 2 | 0 | 0 | 0 | 9  |
| <b>Blue (Type 1) copper domain protein</b>                     |                                                                                                                                              |                                                                 |   |   |   |   |   |   |   |    |

|                                                                     |                                                                                                                                                   |                                                 |   |   |   |   |   |    |    |   |
|---------------------------------------------------------------------|---------------------------------------------------------------------------------------------------------------------------------------------------|-------------------------------------------------|---|---|---|---|---|----|----|---|
| <b>Blue (Type 1) copper domain protein</b>                          | 72% identity to Blue (Type 1) copper domain protein [Nmar_0185] [ <i>Nitrosopumilus maritimus</i> (strain SCM1)]                                  | Marine Group I Crenarchaeota (Nitrosopumilales) | 0 | 0 | 0 | 3 | 0 | 0  | 0  | 5 |
| <i>Plastocyanin-family protein</i>                                  |                                                                                                                                                   |                                                 |   |   |   |   |   |    |    |   |
| <b>Plastocyanin-family protein</b>                                  | 63% identity to Putative copper-binding protein / plastocyanin/azurin family protein [Nmar_0343] [ <i>Nitrosopumilus maritimus</i> (strain SCM1)] | Marine Group I Crenarchaeota (Nitrosopumilales) | 0 | 0 | 0 | 3 | 0 | 0  | 0  | 9 |
|                                                                     |                                                                                                                                                   |                                                 |   |   |   |   |   |    |    |   |
|                                                                     |                                                                                                                                                   |                                                 |   |   |   |   |   |    |    |   |
| <b>OXIDATIVE STRESS</b>                                             |                                                                                                                                                   |                                                 |   |   |   |   |   |    |    |   |
| <i>Alkyl hydroperoxide reductase (peroxiredoxin) (EC 1.11.1.15)</i> |                                                                                                                                                   |                                                 |   |   |   |   |   |    |    |   |
| <b>Alkyl hydroperoxide reductase</b>                                | 80% identity to Putative alkyl hydroperoxide reductase [ <i>Pseudomonas fluorescens</i> (strain SBW25)]                                           | Gammaproteobacteria (Pseudomonadales)           | 0 | 0 | 5 | 0 | 0 | 0  | 13 | 0 |
| <b>Peroxiredoxin</b>                                                | 100% identity to Peroxiredoxin [PrdX] [ <i>Psychroflexus torquus</i> ATCC 700755]                                                                 | Bacteroidetes (Flavobacteria)                   | 0 | 0 | 0 | 3 | 0 | 0  | 0  | 5 |
|                                                                     |                                                                                                                                                   |                                                 |   |   |   |   |   |    |    |   |
| <i>Thioredoxin</i>                                                  |                                                                                                                                                   |                                                 |   |   |   |   |   |    |    |   |
| <b>Thioredoxin</b>                                                  | 99% identity to Thioredoxin [TrxA] [ <i>Shigella flexneri</i> ]                                                                                   | Gammaproteobacteria (Enterobacteriales)         | 0 | 3 | 0 | 0 | 0 | 24 | 0  | 0 |
| <b>Thioredoxin</b>                                                  | 67% identity to Thioredoxin [TrxA] [ <i>Neisseria meningitidis</i> serogroup B]                                                                   | Betaproteobacteria (Neisseriales)               | 0 | 0 | 2 | 0 | 0 | 0  | 7  | 0 |
|                                                                     |                                                                                                                                                   |                                                 |   |   |   |   |   |    |    |   |
| <i>Glutathione S-transferase (EC 2.5.1.18)</i>                      |                                                                                                                                                   |                                                 |   |   |   |   |   |    |    |   |
| <b>Glutathione S-transferase</b>                                    | 100% identity to Glutathione S-transferase-like protein [ <i>Sphingopyxis alaskensis</i> RB2256]                                                  | Alphaproteobacteria (Sphingomonadales)          | 3 | 0 | 0 | 0 | 3 | 0  | 0  | 0 |
|                                                                     |                                                                                                                                                   |                                                 |   |   |   |   |   |    |    |   |
|                                                                     |                                                                                                                                                   |                                                 |   |   |   |   |   |    |    |   |
| <b>REPLICATION &amp; DNA-BINDING PROTEINS</b>                       |                                                                                                                                                   |                                                 |   |   |   |   |   |    |    |   |
| <i>DNA gyrase (EC 5.99.1.3)</i>                                     |                                                                                                                                                   |                                                 |   |   |   |   |   |    |    |   |
| <b>DNA gyrase, subunit A</b>                                        | 100% identity to DNA gyrase subunit A [GyrA] [ <i>Candidatus Pelagibacter ubique</i> HTCC1062]                                                    | Alphaproteobacteria (SAR11 cluster)             | 2 | 0 | 0 | 0 | 3 | 0  | 0  | 0 |
| <b>DNA gyrase, subunit A</b>                                        | 89% identity to DNA gyrase subunit A [GyrA] [ <i>Candidatus Pelagibacter ubique</i> ]                                                             | Alphaproteobacteria (SAR11 cluster)             | 0 | 0 | 2 | 0 | 0 | 0  | 2  | 0 |

|                                                      |                                                                                                                                                               |                                                 |   |   |   |    |   |    |   |    |
|------------------------------------------------------|---------------------------------------------------------------------------------------------------------------------------------------------------------------|-------------------------------------------------|---|---|---|----|---|----|---|----|
| <b>DNA gyrase, subunit A</b>                         | 64% identity to DNA gyrase subunit A [GyrA] [ <i>Hahella chejuensis</i> KCTC 2396]                                                                            | Gammaproteobacteria (Oceanospirillales)         | 0 | 0 | 2 | 0  | 0 | 0  | 3 | 0  |
| <b>DNA gyrase, subunit A</b>                         | 80% identity to DNA gyrase subunit A [GyrA] [Rmag_0306] [ <i>Candidatus Ruthia magnifica</i> ]                                                                | Gammaproteobacteria (GSO-EOSA-1)                | 0 | 0 | 1 | 5  | 0 | 0  | 1 | 10 |
| <b>DNA gyrase, subunit B</b>                         | 68% identity to DNA gyrase subunit B [GyrB] [Rmag_0003] [ <i>Candidatus Ruthia magnifica</i> ]                                                                | Gammaproteobacteria (GSO-EOSA-1)                | 0 | 0 | 2 | 10 | 0 | 0  | 2 | 28 |
|                                                      |                                                                                                                                                               |                                                 |   |   |   |    |   |    |   |    |
| <b>DNA topoisomerase (EC 5.99.1.2 / EC 5.99.1.3)</b> |                                                                                                                                                               |                                                 |   |   |   |    |   |    |   |    |
| <b>DNA topoisomerase I</b>                           | 68% identity to DNA topoisomerase I [TopA] [Rmag_1034] [ <i>Candidatus Ruthia magnifica</i> ]                                                                 | Gammaproteobacteria (GSO-EOSA-1)                | 0 | 0 | 0 | 7  | 0 | 0  | 0 | 16 |
| <b>DNA topoisomerase VI, A subunit</b>               | 100% identity to DNA topoisomerase VI, A subunit [Top6A] [Nmar_1407] [ <i>Nitrosopumilus maritimus</i> (strain SCM1)]                                         | Marine Group I Crenarchaeota (Nitrosopumilales) | 0 | 0 | 0 | 2  | 0 | 0  | 0 | 5  |
| <b>DNA topoisomerase VI, B subunit</b>               | 100% identity to DNA topoisomerase VI, B subunit [Top6B] [Nmar_1408] [ <i>Nitrosopumilus maritimus</i> (strain SCM1)]                                         | Marine Group I Crenarchaeota (Nitrosopumilales) | 0 | 5 | 0 | 0  | 0 | 13 | 0 | 0  |
|                                                      |                                                                                                                                                               |                                                 |   |   |   |    |   |    |   |    |
| <b>MCM family protein (replication control)</b>      |                                                                                                                                                               |                                                 |   |   |   |    |   |    |   |    |
| <b>MCM family protein</b>                            | 87% identity to MCM family protein [Nmar_0242] [ <i>Nitrosopumilus maritimus</i> (strain SCM1)]                                                               | Marine Group I Crenarchaeota (Nitrosopumilales) | 0 | 0 | 0 | 4  | 0 | 0  | 0 | 9  |
|                                                      |                                                                                                                                                               |                                                 |   |   |   |    |   |    |   |    |
| <b>DNA polymerase sliding clamp</b>                  |                                                                                                                                                               |                                                 |   |   |   |    |   |    |   |    |
| <b>DNA polymerase sliding clamp</b>                  | 87% identity to DNA polymerase sliding clamp (Proliferating cell nuclear antigen homolog) [PcnA] [Nmar_1755] [ <i>Nitrosopumilus maritimus</i> (strain SCM1)] | Marine Group I Crenarchaeota (Nitrosopumilales) | 0 | 0 | 0 | 3  | 0 | 0  | 0 | 16 |
|                                                      |                                                                                                                                                               |                                                 |   |   |   |    |   |    |   |    |
| <b>FtsZ cell division protein</b>                    |                                                                                                                                                               |                                                 |   |   |   |    |   |    |   |    |
| <b>FtsZ cell division protein</b>                    | 87% identity to Cell division protein FtsZ [ <i>Candidatus Pelagibacter ubique</i> HTT1062]                                                                   | Alphaproteobacteria (SAR11 cluster)             | 1 | 2 | 0 | 0  | 1 | 4  | 0 | 0  |
|                                                      |                                                                                                                                                               |                                                 |   |   |   |    |   |    |   |    |
| <b>Recombinase A</b>                                 |                                                                                                                                                               |                                                 |   |   |   |    |   |    |   |    |
| <b>Recombinase A</b>                                 | 100% identity to Recombinase A [RecA] [ <i>Candidatus Pelagibacter ubique</i> HTCC1002]                                                                       | Alphaproteobacteria (SAR11 cluster)             | 2 | 2 | 0 | 0  | 3 | 2  | 0 | 0  |
| <b>Recombinase A</b>                                 | 100% identity to Recombinase A [RecA] [ <i>Novosphingobium aromaticivorans</i> (strain DSM 12444)]                                                            | Alphaproteobacteria (Sphingomonadales)          | 2 | 0 | 0 | 0  | 2 | 0  | 0 | 0  |

|                                   |                                                                                                                                |                                                                       |   |   |   |   |   |   |    |    |
|-----------------------------------|--------------------------------------------------------------------------------------------------------------------------------|-----------------------------------------------------------------------|---|---|---|---|---|---|----|----|
| <b>Recombinase A</b>              | 76% identity to Recombinase A [RecA]<br>[ <i>Thiomicrospira crunogena</i> (strain XCL-2)]                                      | Gamma proteobacteria<br>(Thiotrichales)                               | 0 | 0 | 1 | 5 | 0 | 0 | 1  | 10 |
|                                   |                                                                                                                                |                                                                       |   |   |   |   |   |   |    |    |
| <b>Excinuclease</b>               |                                                                                                                                |                                                                       |   |   |   |   |   |   |    |    |
| <b>Excinuclease ABC chain A</b>   | 100% identity to Excinuclease ABC chain A<br>[UvrA] [ <i>Candidatus Pelagibacter ubique</i><br>HTCC1062]                       | Alphaproteobacteria<br>(SAR11 cluster)                                | 3 | 2 | 0 | 0 | 7 | 3 | 0  | 0  |
| <b>Excinuclease ABC subunit A</b> | 100% identity to Excinuclease ABC subunit A<br>[UvrA] [ <i>Haemophilus somnus</i> 129PT] ( <i>likely<br/>contaminant</i> )     | Gamma proteobacteria<br>(Pasteurellales)                              | 2 | 2 | 0 | 0 | 3 | 4 | 0  | 0  |
|                                   |                                                                                                                                |                                                                       |   |   |   |   |   |   |    |    |
| <b>Cold shock proteins</b>        |                                                                                                                                |                                                                       |   |   |   |   |   |   |    |    |
| <b>CspL protein (RNA-binding)</b> | 100% identity to Cold shock domain protein<br>[CspL] [ <i>Candidatus Pelagibacter ubique</i><br>HTCC1062]                      | Alphaproteobacteria<br>(SAR11 cluster)                                | 2 | 1 | 0 | 0 | 6 | 1 | 0  | 0  |
| <b>Cold shock protein CspC</b>    | 100% identity to Cold shock protein,<br>transcription antiterminator [CspC]<br>[ <i>Pseudoalteromonas haloplanktis</i> TAC125] | Gamma proteobacteria<br>(Alteromonadales)                             | 2 | 0 | 0 | 0 | 3 | 0 | 0  | 0  |
| <b>Cold shock protein</b>         | 93% identity to Cold-shock family protein<br>[ <i>Pseudoalteromonas atlantica</i> (strain T6c /<br>BAA-1087)]                  | Gamma proteobacteria<br>(Alteromonadales)                             | 0 | 0 | 2 | 1 | 0 | 0 | 15 | 1  |
| <b>Cold shock protein</b>         | 100% identity to Cold-shock family protein<br>[ <i>Colwellia psychrerythraea</i> 34H]                                          | Gamma proteobacteria<br>(Alteromonadales)                             | 2 | 0 | 0 | 0 | 5 | 0 | 0  | 0  |
| <b>Cold shock protein</b>         | 100% identity to Cold shock family protein<br>[Alteromonadales bacterium TW-7]                                                 | Gamma proteobacteria<br>(Alteromonadales)                             | 2 | 0 | 0 | 0 | 2 | 0 | 0  | 0  |
| <b>Cold shock protein</b>         | 79% identity to Cold-shock family protein<br>[ <i>Thiomicrospira crunogena</i> (strain XCL-2)]                                 | Gamma proteobacteria<br>(Thiotrichales)                               | 0 | 0 | 4 | 1 | 0 | 0 | 21 | 1  |
| <b>Cold shock protein</b>         | 77% identity to Cold-shock family protein<br>[uncultured SUP05 cluster bacterium]                                              | Gamma proteobacteria<br>(GSO-EOSA-1)                                  | 0 | 0 | 2 | 0 | 0 | 0 | 2  | 0  |
|                                   |                                                                                                                                |                                                                       |   |   |   |   |   |   |    |    |
| <b>DNA-binding protein HU</b>     |                                                                                                                                |                                                                       |   |   |   |   |   |   |    |    |
| <b>DNA-binding protein HU</b>     | 100% identity to DNA-binding protein HU [Hup]<br>[ <i>Candidatus Pelagibacter ubique</i> HTCC1062]                             | Alphaproteobacteria<br>(SAR11 cluster)                                | 3 | 2 | 0 | 0 | 9 | 4 | 0  | 0  |
| <b>DNA-binding protein HU</b>     | 93% identity to DNA-binding protein HU, form<br>N [Hup] [Rhodobacterales bacterium<br>HTCC2255]                                | Alphaproteobacteria<br>(Rhodobacterales,<br><i>Roseobacter</i> clade) | 0 | 0 | 2 | 0 | 0 | 0 | 3  | 0  |
| <b>DNA-binding protein HU</b>     | 100% identity to DNA-binding protein HU [Hup]<br>[ <i>Sphingopyxis alaskensis</i> RB2256]                                      | Alphaproteobacteria<br>(Sphingomonadales)                             | 5 | 0 | 0 | 0 | 9 | 0 | 0  | 0  |
| <b>DNA-binding protein HU</b>     | 80% identity to DNA-binding protein HU [Hup]<br>[ <i>Colwellia psychrerythraea</i> 34H]                                        | Gamma proteobacteria<br>(Alteromonadales)                             | 0 | 0 | 5 | 0 | 0 | 0 | 16 | 0  |

|                                                          |                                                                                                                        |                                                 |   |    |   |   |    |    |    |    |
|----------------------------------------------------------|------------------------------------------------------------------------------------------------------------------------|-------------------------------------------------|---|----|---|---|----|----|----|----|
| <b>DNA-binding protein HU</b>                            | 81% identity to DNA-binding protein HU [Hup] [marine gamma proteobacterium HTCC2143]                                   | Gammaproteobacteria (OMG)                       | 0 | 0  | 6 | 0 | 0  | 0  | 12 | 0  |
| <b>DNA-binding protein HU</b>                            | 86% identity to DNA-binding protein HU [Hup] [Rmag_0380] [ <i>Candidatus</i> Ruthia magna]                             | Gammaproteobacteria (GSO-EOSA-1)                | 0 | 0  | 5 | 4 | 0  | 0  | 14 | 24 |
| <b>DNA-binding protein HU</b>                            | 83% identity to DNA-binding protein HU [Hup] [uncultured SUP05 cluster bacterium]                                      | Gammaproteobacteria (GSO-EOSA-1)                | 0 | 0  | 2 | 0 | 0  | 0  | 2  | 0  |
| <b>DNA-binding protein HU</b>                            | 100% identity to DNA-binding protein HU [Hup] [Flavobacteria bacterium MS024-2A],                                      | Bacteroidetes (Flavobacteria)                   | 0 | 0  | 2 | 0 | 0  | 0  | 4  | 0  |
| <b>DNA-binding protein HU</b>                            | 100% identity to DNA-binding protein HU [Hup] [Flavobacteria bacterium MS024-2A]                                       | Bacteroidetes (Flavobacteria)                   | 4 | 0  | 0 | 0 | 6  | 0  | 0  | 0  |
| <b>DNA-binding protein HU</b>                            | 81% identity to DNA-binding protein HU [Hup] [ <i>Polaribacter irgensii</i> 23-P]                                      | Bacteroidetes (Flavobacteria)                   | 0 | 0  | 2 | 0 | 0  | 0  | 2  | 0  |
| <b>DNA-binding protein HU</b>                            | 97% identity to DNA-binding protein HU [Hup] [ <i>Polaribacter irgensii</i> 23-P]                                      | Bacteroidetes (Flavobacteria)                   | 0 | 0  | 4 | 0 | 0  | 0  | 8  | 0  |
|                                                          |                                                                                                                        |                                                 |   |    |   |   |    |    |    |    |
|                                                          |                                                                                                                        |                                                 |   |    |   |   |    |    |    |    |
| <b>TRANSCRIPTION &amp; RNA-BINDING PROTEINS</b>          |                                                                                                                        |                                                 |   |    |   |   |    |    |    |    |
| <i>Transcription initiation factor TFIIB</i>             |                                                                                                                        |                                                 |   |    |   |   |    |    |    |    |
| <b>Transcription initiation factor TFIIB</b>             | 73% identity to Transcription factor TFIIB cyclin-related [Nmar_0020] [ <i>Nitrosopumilus maritimus</i> (strain SCM1)] | Marine Group I Crenarchaeota (Nitrosopumilales) | 0 | 0  | 0 | 5 | 0  | 0  | 0  | 15 |
| <b>Transcription initiation factor TFIIB</b>             | 66% identity to Transcription factor TFIIB cyclin-related [Nmar_0979] [ <i>Nitrosopumilus maritimus</i> (strain SCM1)] | Marine Group I Crenarchaeota (Nitrosopumilales) | 0 | 0  | 0 | 2 | 0  | 0  | 0  | 5  |
|                                                          |                                                                                                                        |                                                 |   |    |   |   |    |    |    |    |
| <i>Transcription termination factor Rho (EC 3.6.4.-)</i> |                                                                                                                        |                                                 |   |    |   |   |    |    |    |    |
| <b>Transcription termination factor Rho</b>              | 100% identity to Transcription termination factor Rho [ <i>Candidatus</i> Pelagibacter ubique HTCC1062]                | Alphaproteobacteria (SAR11 cluster)             | 8 | 10 | 0 | 0 | 29 | 54 | 0  | 0  |
| <b>Transcription termination factor Rho</b>              | 100% identity to Transcription termination factor Rho [ <i>Oceanibulbus indolifex</i> HEL-45]                          | Alphaproteobacteria (Rhodobacterales)           | 2 | 1  | 0 | 0 | 2  | 3  | 0  | 0  |
| <b>Transcription termination factor Rho</b>              | 83% identity to Transcription termination factor Rho [Rmag_0477] [ <i>Candidatus</i> Ruthia magna]                     | Gammaproteobacteria (GSO-EOSA-1)                | 0 | 0  | 1 | 4 | 0  | 0  | 1  | 6  |
|                                                          |                                                                                                                        |                                                 |   |    |   |   |    |    |    |    |
| <i>DNA-directed RNA polymerase (RNAP) (EC 2.7.7.6)</i>   |                                                                                                                        |                                                 |   |    |   |   |    |    |    |    |
| <b>DNA-directed RNA polymerase, alpha subunit</b>        | 100% identity to DNA-directed RNA polymerase, alpha subunit [RpoA] [ <i>Candidatus</i> Pelagibacter ubique HTCC1002]   | Alphaproteobacteria (SAR11 cluster)             | 0 | 0  | 9 | 6 | 0  | 0  | 24 | 23 |

|                                                    |                                                                                                                     |                                                                 |    |    |    |   |    |    |    |   |
|----------------------------------------------------|---------------------------------------------------------------------------------------------------------------------|-----------------------------------------------------------------|----|----|----|---|----|----|----|---|
| <b>DNA-directed RNA polymerase, beta subunit</b>   | 100% identity to DNA-directed RNA polymerase, beta subunit [RpoB] [ <i>Candidatus Pelagibacter ubique</i> HTCC1002] | Alphaproteobacteria (SAR11 cluster)                             | 11 | 12 | 0  | 0 | 33 | 28 | 0  | 0 |
| <b>DNA-directed RNA polymerase, beta subunit</b>   | 100% identity to DNA-directed RNA polymerase, beta subunit [RpoB] [ <i>Candidatus Pelagibacter ubique</i> HTCC1062] | Alphaproteobacteria (SAR11 cluster)                             | 12 | 8  | 0  | 0 | 34 | 28 | 0  | 0 |
| <b>DNA-directed RNA polymerase, sigma factor</b>   | 100% identity to DNA-directed RNA polymerase, sigma factor RpoD [ <i>Candidatus Pelagibacter ubique</i> HTCC1062]   | Alphaproteobacteria (SAR11 cluster)                             | 0  | 2  | 0  | 0 | 0  | 5  | 0  | 0 |
| <b>DNA-directed RNA polymerase, beta subunit</b>   | 94% identity to DNA-directed RNA polymerase, beta subunit [RpoB] [ <i>Candidatus Pelagibacter ubique</i> HTCC1002]  | Alphaproteobacteria (SAR11 cluster)                             | 0  | 0  | 3  | 1 | 0  | 0  | 4  | 1 |
| <b>DNA-directed RNA polymerase, omega subunit</b>  | 77% identity to DNA-directed RNA polymerase, omega subunit [RpoZ] [ <i>Candidatus Pelagibacter ubique</i> HTCC1002] | Alphaproteobacteria (SAR11 cluster)                             | 0  | 0  | 2  | 1 | 0  | 0  | 2  | 1 |
| <b>DNA-directed RNA polymerase,, alpha subunit</b> | 100% identity to DNA-directed RNA polymerase, alpha subunit [RpoA] [ <i>Roseobacter</i> sp. SK209-2-6]              | Alphaproteobacteria (Rhodobacterales, <i>Roseobacter</i> clade) | 5  | 2  | 0  | 0 | 11 | 2  | 0  | 0 |
| <b>DNA-directed RNA polymerase,alpha subunit</b>   | 100% identity to DNA-directed RNA polymerase, alpha subunit [RpoA] [ <i>Loktanella vestfoldensis</i> SKA53]         | Alphaproteobacteria (Rhodobacterales, <i>Roseobacter</i> clade) | 2  | 0  | 0  | 0 | 4  | 0  | 0  | 0 |
| <b>DNA-directed RNA polymerase, beta subunit</b>   | 100% identity to DNA-directed RNA polymerase, beta subunit [RpoB] [Rhodobacterales bacterium Y4I]                   | Alphaproteobacteria (Rhodobacterales)                           | 4  | 1  | 0  | 0 | 7  | 1  | 0  | 0 |
| <b>DNA-directed RNA polymerase, beta' subunit</b>  | 100% identity to DNA-directed RNA polymerase, beta' subunit [RpoC] [ <i>Roseobacter denitrificans</i> OCh 114]      | Alphaproteobacteria (Rhodobacterales, <i>Roseobacter</i> clade) | 2  | 1  | 0  | 0 | 5  | 2  | 0  | 0 |
| <b>DNA-directed RNA polymerase, beta' subunit</b>  | 100% identity to DNA-directed RNA polymerase, beta' subunit [RpoC] [ <i>Sphingopyxis alaskensis</i> RB2256]         | Alphaproteobacteria (Sphingomonadales)                          | 5  | 0  | 0  | 0 | 12 | 0  | 0  | 0 |
| <b>DNA-directed RNA polymerase, beta subunit</b>   | 100% identity to DNA-directed RNA polymerase, beta subunit [RpoB] [ <i>Sphingopyxis alaskensis</i> RB2256]          | Alphaproteobacteria (Sphingomonadales)                          | 5  | 0  | 0  | 0 | 6  | 0  | 0  | 0 |
| <b>DNA-directed RNA polymerase, alpha subunit</b>  | 100% identity to DNA-directed RNA polymerase, alpha subunit [RpoA] [ <i>Moritella</i> sp. PE36]                     | Gammaproteobacteria (Alteromonadales)                           | 3  | 0  | 0  | 0 | 3  | 0  | 0  | 0 |
| <b>DNA-directed RNA polymerase, beta subunit</b>   | 100% identity to DNA-directed DNA-directed RNA polymerase, beta subunit [RpoB] [ <i>Moritella</i> sp. PE36]         | Gammaproteobacteria (Alteromonadales)                           | 2  | 0  | 0  | 0 | 2  | 0  | 0  | 0 |
| <b>DNA-directed RNA polymerase, beta' subunit</b>  | 100% identity to DNA-directed RNA polymerase, beta' subunit [RpoC] [ <i>Pseudoalteromonas haloplanktis</i> TAC125]  | Gammaproteobacteria (Alteromonadales)                           | 2  | 0  | 0  | 0 | 2  | 0  | 0  | 0 |
| <b>DNA-directed RNA polymerase, beta subunit</b>   | 79% identity to DNA-directed RNA polymerase, beta subunit [RpoB] [ <i>Neptuniibacter caesariensis</i> ]             | Gammaproteobacteria (Oceanospirillales)                         | 0  | 0  | 22 | 4 | 0  | 0  | 55 | 7 |
| <b>DNA-directed RNA polymerase, alpha subunit</b>  | 76% identity to DNA-directed RNA polymerase, alpha subunit [RpoA] [ <i>Marinomonas</i> sp. (strain MWYL1)]          | Gammaproteobacteria (Oceanospirillales)                         | 0  | 0  | 12 | 2 | 0  | 0  | 27 | 6 |

|                                                   |                                                                                                                              |                                                 |   |   |   |    |   |    |    |    |
|---------------------------------------------------|------------------------------------------------------------------------------------------------------------------------------|-------------------------------------------------|---|---|---|----|---|----|----|----|
| <b>DNA-directed RNA polymerase, alpha subunit</b> | 70% identity to DNA-directed RNA polymerase, alpha subunit [RpoA] ( <i>Pseudomonas fluorescens</i> subsp. <i>cellulosa</i> ) | Gammaproteobacteria (Oceanospirillales)         | 0 | 0 | 3 | 2  | 0 | 0  | 5  | 2  |
| <b>DNA-directed RNA polymerase, beta' subunit</b> | 78% identity to DNA-directed RNA polymerase, beta' subunit [RpoC] [ <i>Neptuniibacter caesariensis</i> ]                     | Gammaproteobacteria (Oceanospirillales)         | 0 | 0 | 4 | 1  | 0 | 0  | 6  | 1  |
| <b>DNA-directed RNA polymerase, beta subunit</b>  | 100% identity to DNA-directed RNA polymerase, beta subunit [RpoB] [ <i>Hahella chejuensis</i> KCTC 2396]                     | Gammaproteobacteria (Oceanospirillales)         | 2 | 0 | 0 | 0  | 5 | 0  | 0  | 0  |
| <b>DNA-directed RNA polymerase, beta subunit</b>  | 69% identity to DNA-directed RNA polymerase, beta subunit [RpoB] [ <i>Marinomonas</i> sp. MED121]                            | Gammaproteobacteria (Oceanospirillales)         | 0 | 0 | 3 | 0  | 0 | 0  | 5  | 0  |
| <b>DNA-directed RNA polymerase, beta' subunit</b> | 100% identity to DNA-directed RNA polymerase, beta' subunit [RpoC] [ <i>Pseudomonas mendocina</i> ymp]                       | Gammaproteobacteria (Pseudomonadales)           | 2 | 1 | 0 | 0  | 7 | 2  | 0  | 0  |
| <b>DNA-directed RNA polymerase, beta subunit</b>  | 100% identity to DNA-directed RNA polymerase, beta subunit [RpoB] [ <i>Candidatus Ruthia magnifica</i> ]                     | Gammaproteobacteria (GSO-EOSA-1)                | 0 | 0 | 4 | 11 | 0 | 0  | 16 | 36 |
| <b>DNA-directed RNA polymerase, alpha subunit</b> | 77% identity to DNA-directed RNA polymerase, alpha subunit [RpoA] [ <i>Candidatus Ruthia magnifica</i> ]                     | Gammaproteobacteria (GSO-EOSA-1)                | 0 | 0 | 3 | 3  | 0 | 0  | 3  | 7  |
| <b>DNA-directed RNA polymerase, sigma factor</b>  | 53% identity to RNA polymerase sigma factor [RpoD] [Rmag_0108] [ <i>Candidatus Ruthia magnifica</i> ]                        | Gammaproteobacteria (GSO-EOSA-1)                | 0 | 0 | 0 | 2  | 0 | 0  | 0  | 3  |
| <b>DNA-directed RNA polymerase, beta subunit</b>  | 83% identity to DNA-directed RNA polymerase, beta subunit [RpoB] [ <i>Candidatus Ruthia magnifica</i> ]                      | Gammaproteobacteria (GSO-EOSA-1)                | 0 | 0 | 1 | 2  | 0 | 0  | 1  | 2  |
| <b>DNA-directed RNA polymerase, beta' subunit</b> | 79% identity to DNA-directed RNA polymerase, beta' subunit [RpoC] [ <i>Candidatus Ruthia magnifica</i> ]                     | Gammaproteobacteria (GSO-EOSA-1)                | 0 | 0 | 1 | 8  | 0 | 0  | 1  | 14 |
| <b>DNA-directed RNA polymerase, alpha subunit</b> | 100% identity to DNA-directed RNA polymerase, alpha subunit [RpoA] [ <i>Polaribacter</i> sp. MED152]                         | Bacteroidetes (Flavobacteria)                   | 2 | 0 | 0 | 0  | 2 | 0  | 0  | 0  |
| <b>DNA-directed RNA polymerase, subunit A'</b>    | 88% identity to DNA-directed RNA polymerase, subunit A' [Nmar_0348] [ <i>Nitrosopumilus maritimus</i> (strain SCM1)]         | Marine Group I Crenarchaeota (Nitrosopumilales) | 0 | 0 | 0 | 5  | 0 | 0  | 0  | 15 |
| <b>DNA-directed RNA polymerase, subunit A'</b>    | 100% identity to DNA-directed RNA polymerase, subunit A' [Nmar_0348] [ <i>Nitrosopumilus maritimus</i> (strain SCM1)]        | Marine Group I Crenarchaeota (Nitrosopumilales) | 0 | 8 | 0 | 0  | 0 | 20 | 0  | 0  |
| <b>DNA-directed RNA polymerase, subunit beta</b>  | 100% identity to DNA-directed RNA polymerase, subunit beta [Nmar_0347] [ <i>Nitrosopumilus maritimus</i> (strain SCM1)]      | Marine Group I Crenarchaeota (Nitrosopumilales) | 0 | 9 | 0 | 0  | 0 | 40 | 0  | 0  |
| <b>DNA-directed RNA polymerase, subunit beta</b>  | 93% identity to DNA-directed RNA polymerase, subunit beta [Nmar_0347] [ <i>Nitrosopumilus maritimus</i> (strain SCM1)]       | Marine Group I Crenarchaeota (Nitrosopumilales) | 0 | 0 | 0 | 2  | 0 | 0  | 0  | 10 |
| <b>DNA-directed RNA polymerase, subunit beta'</b> | 88% identity to DNA-directed RNA polymerase, subunit beta' [Nmar_0348] [ <i>Nitrosopumilus maritimus</i> (strain SCM1)]      | Marine Group I Crenarchaeota (Nitrosopumilales) | 0 | 0 | 0 | 2  | 0 | 0  | 0  | 8  |



|                                         |                                                                                                                    |                                                                 |   |   |   |   |   |    |    |    |  |
|-----------------------------------------|--------------------------------------------------------------------------------------------------------------------|-----------------------------------------------------------------|---|---|---|---|---|----|----|----|--|
|                                         |                                                                                                                    |                                                                 |   |   |   |   |   |    |    |    |  |
| <b>DNA primase (EC 2.7.7.-)</b>         |                                                                                                                    |                                                                 |   |   |   |   |   |    |    |    |  |
| <b>DNA primase</b>                      | 100% identity to Toprim sub domain protein [Nmar_1302] [ <i>Nitrosopumilus maritimus</i> (strain SCM1)]            | Marine Group I Crenarchaeota (Nitrosopumilales)                 | 0 | 3 | 0 | 0 | 0 | 6  | 0  | 0  |  |
|                                         |                                                                                                                    |                                                                 |   |   |   |   |   |    |    |    |  |
| <b>Antitermination factor NusA</b>      |                                                                                                                    |                                                                 |   |   |   |   |   |    |    |    |  |
| <b>Antitermination factor NusA</b>      | 100% identity to Antitermination factor NusA [ <i>Candidatus Pelagibacter ubique</i> HTCC1062]                     | Alphaproteobacteria (SAR11 cluster)                             | 5 | 7 | 0 | 0 | 7 | 15 | 0  | 0  |  |
| <b>Antitermination factor NusA</b>      | 74% identity to Antitermination factor NusA [Rmag_0053] [ <i>Candidatus Ruthia magnifica</i> ]                     | Gammaaproteobacteria (GSO-EOSA-1)                               | 0 | 0 | 0 | 3 | 0 | 0  | 0  | 14 |  |
|                                         |                                                                                                                    |                                                                 |   |   |   |   |   |    |    |    |  |
| <b>Transcriptional regulators</b>       |                                                                                                                    |                                                                 |   |   |   |   |   |    |    |    |  |
| <b>Transcriptional regulator, CarD</b>  | 100% identity to Putative uncharacterized protein CarD [ <i>Candidatus Pelagibacter ubique</i> HTCC1002]           | Alphaproteobacteria (SAR11 cluster)                             | 2 | 1 | 0 | 0 | 4 | 1  | 0  | 0  |  |
| <b>Transcriptional regulatory, AtoC</b> | 70% identity to C4-dicarboxylate transport transcriptional regulatory protein [ <i>Roseovarius</i> sp. HTCC2601]   | Alphaproteobacteria (Rhodobacterales, <i>Roseobacter</i> clade) | 0 | 0 | 1 | 3 | 0 | 0  | 1  | 5  |  |
| <b>Transcriptional regulator, LacI</b>  | 90% identity to Transcriptional regulator, LacI [uncultured marine microorganism HF4000_009A22]                    | Bacteria? (unclassified)                                        | 0 | 0 | 2 | 1 | 0 | 0  | 5  | 3  |  |
| <b>Transcriptional regulator, LacI</b>  | 81% identity to Transcriptional regulator, LacI [uncultured marine microorganism HF4000_009A22]                    | Bacteria? (unclassified)                                        | 0 | 0 | 7 | 7 | 0 | 0  | 17 | 28 |  |
| <b>Transcriptional regulator, LacI</b>  | 59% identity to Transcriptional regulator, LacI [uncultured marine microorganism HF4000_APKG2K17]                  | Bacteria? (unclassified)                                        | 0 | 0 | 6 | 8 | 0 | 0  | 10 | 26 |  |
| <b>Transcriptional regulator, LacI</b>  | 65% identity to Transcriptional regulator, LacI [uncultured marine microorganism HF4000_APKG2K17]                  | Bacteria? (unclassified)                                        | 0 | 0 | 5 | 6 | 0 | 0  | 9  | 11 |  |
| <b>Transcriptional regulator, LysR</b>  | 65% identity to Transcriptional regulator, LysR [uncultured marine bacterium HF10_25F10]                           | Bacteria? (unclassified)                                        | 0 | 0 | 0 | 2 | 0 | 0  | 0  | 6  |  |
| <b>Transcriptional regulator, ArsR</b>  | 100% identity to ArsR family transcriptional regulator [ <i>Methanococcoides burtonii</i> DSM 6242]                | Euryarchaeota (Methanosarcinales)                               | 2 | 0 | 0 | 0 | 9 | 0  | 0  | 0  |  |
| <b>Transcriptional regulator, ArsR</b>  | 80% identity to ArsR family transcriptional regulator [Nmar_1628] [ <i>Nitrosopumilus maritimus</i> (strain SCM1)] | Marine Group I Crenarchaeota (Nitrosopumilales)                 | 0 | 0 | 0 | 5 | 0 | 0  | 0  | 11 |  |
| <b>Transcriptional regulator, MerR</b>  | 74% identity to MerR family transcriptional regulator [Nmar_0978] [ <i>Nitrosopumilus maritimus</i> (strain SCM1)] | Marine Group I Crenarchaeota (Nitrosopumilales)                 | 0 | 0 | 0 | 2 | 0 | 0  | 0  | 6  |  |

|                                                               |                                                                                                                                                      |                                                                 |   |   |   |   |    |    |    |    |
|---------------------------------------------------------------|------------------------------------------------------------------------------------------------------------------------------------------------------|-----------------------------------------------------------------|---|---|---|---|----|----|----|----|
|                                                               |                                                                                                                                                      |                                                                 |   |   |   |   |    |    |    |    |
| <b>Polyribonucleotide nucleotidyltransferase (EC 2.7.7.8)</b> |                                                                                                                                                      |                                                                 |   |   |   |   |    |    |    |    |
| <b>Polyribonucleotide nucleotidyltransferase</b>              | 100% identity to Polyribonucleotide nucleotidyltransferase [Pnp] [ <i>Candidatus Pelagibacter ubique</i> HTCC1062]                                   | Alphaproteobacteria (SAR11 cluster)                             | 6 | 9 | 0 | 0 | 16 | 18 | 0  | 0  |
| <b>Polyribonucleotide nucleotidyltransferase</b>              | 94% identity to Polyribonucleotide nucleotidyltransferase [Pnp] [ <i>Candidatus Pelagibacter ubique</i> HTCC1002]                                    | Alphaproteobacteria (SAR11 cluster)                             | 0 | 0 | 5 | 4 | 0  | 0  | 10 | 14 |
| <b>Polyribonucleotide nucleotidyltransferase</b>              | 91% identity to Polyribonucleotide nucleotidyltransferase [Pnp] [ <i>Candidatus Pelagibacter ubique</i> HTCC1002]                                    | Alphaproteobacteria (SAR11 cluster)                             | 0 | 0 | 0 | 2 | 0  | 0  | 0  | 3  |
| <b>Polyribonucleotide nucleotidyltransferase</b>              | 87% identity to Polyribonucleotide nucleotidyltransferase [Pnp] [ <i>Candidatus Pelagibacter ubique</i> ]                                            | Alphaproteobacteria (SAR11 cluster)                             | 0 | 0 | 3 | 2 | 0  | 0  | 5  | 7  |
| <b>Polyribonucleotide nucleotidyltransferase</b>              | 100% identity to Polyribonucleotide nucleotidyltransferase [Pnp] [ <i>Octadecabacter antarcticus</i> 307]                                            | Alphaproteobacteria (Rhodobacterales, <i>Roseobacter</i> clade) | 2 | 2 | 0 | 0 | 8  | 2  | 0  | 0  |
| <b>Polyribonucleotide nucleotidyltransferase</b>              | 100% identity to Polyribonucleotide nucleotidyltransferase [Pnp] [ <i>Sphingopyxis alaskensis</i> RB2256]                                            | Alphaproteobacteria (Sphingomonadales)                          | 2 | 0 | 0 | 0 | 2  | 0  | 0  | 0  |
| <b>Polyribonucleotide nucleotidyltransferase</b>              | 100% identity to Polyribonucleotide nucleotidyltransferase [Pnp] [ <i>Pseudoalteromonas haloplanktis</i> TAC125]                                     | Gammaproteobacteria (Alteromonadales)                           | 7 | 1 | 0 | 0 | 11 | 1  | 0  | 0  |
| <b>Polyribonucleotide nucleotidyltransferase</b>              | 100% identity to Polyribonucleotide nucleotidyltransferase [Pnp] [ <i>Moritella</i> sp. PE36]                                                        | Gammaproteobacteria (Alteromonadales)                           | 3 | 0 | 0 | 0 | 4  | 0  | 0  | 0  |
| <b>Polyribonucleotide nucleotidyltransferase</b>              | 70% identity to Polyribonucleotide nucleotidyltransferase [Pnp] [ <i>Chromohalobacter salexigens</i> (strain DSM 3043 / ATCC BAA-138 / NCIMB 13768)] | Gammaproteobacteria (Oceanospirillales)                         | 0 | 0 | 1 | 2 | 0  | 0  | 1  | 3  |
| <b>Polyribonucleotide nucleotidyltransferase</b>              | 68% identity to Polyribonucleotide nucleotidyltransferase [Pnp] [ <i>Neptuniibacter caesariensis</i> ]                                               | Gammaproteobacteria (Oceanospirillales)                         | 0 | 0 | 2 | 2 | 0  | 0  | 5  | 5  |
| <b>Polyribonucleotide nucleotidyltransferase</b>              | 90% identity to Polyribonucleotide nucleotidyltransferase [Pnp] [ <i>Marinomonas</i> sp. MED121]                                                     | Gammaproteobacteria (Oceanospirillales)                         | 0 | 0 | 2 | 0 | 0  | 0  | 2  | 0  |
| <b>Polyribonucleotide nucleotidyltransferase</b>              | 76% identity to Polyribonucleotide nucleotidyltransferase [Pnp] [ <i>Pseudomonas aeruginosa</i> ]                                                    | Gammaproteobacteria (Pseudomonadales)                           | 0 | 0 | 9 | 4 | 0  | 0  | 39 | 25 |
| <b>Polyribonucleotide nucleotidyltransferase</b>              | 71% identity to Polyribonucleotide nucleotidyltransferase [Pnp] [uncultured gamma proteobacterium HF0070_08D07]                                      | Gammaproteobacteria (unclassified)                              | 0 | 0 | 2 | 1 | 0  | 0  | 4  | 5  |
| <b>Polyribonucleotide nucleotidyltransferase</b>              | 56% identity to Polyribonucleotide nucleotidyltransferase [Pnp] [uncultured gamma proteobacterium HF0010_01E20]                                      | Gammaproteobacteria (unclassified)                              | 0 | 0 | 6 | 0 | 0  | 0  | 7  | 0  |



|                                                         |                                                                                                                              |                                                 |   |   |   |   |    |    |    |    |  |
|---------------------------------------------------------|------------------------------------------------------------------------------------------------------------------------------|-------------------------------------------------|---|---|---|---|----|----|----|----|--|
| <i>RNA helicase, ATP-dependent (EC 2.3.1.129)</i>       |                                                                                                                              |                                                 |   |   |   |   |    |    |    |    |  |
| <b>RNA helicase, ATP-dependent</b>                      | 94% identity to Probable ATP-dependent RNA helicase [RhlE] [ <i>Candidatus Pelagibacter ubique</i> HTCC1002]                 | Alphaproteobacteria (SAR11 cluster)             | 0 | 0 | 1 | 2 | 0  | 0  | 1  | 2  |  |
|                                                         |                                                                                                                              |                                                 |   |   |   |   |    |    |    |    |  |
| <i>DEAD/DEAH box RNA helicase</i>                       |                                                                                                                              |                                                 |   |   |   |   |    |    |    |    |  |
| <b>ATP-dependent RNA helicase DeaD</b>                  | 58% identity to ATP-dependent RNA helicase DeaD] [ <i>Cellvibrio japonicus</i> (strain Ueda107)]                             | Gammaproteobacteria (Pseudomonadales)           | 0 | 0 | 7 | 0 | 0  | 0  | 14 | 0  |  |
| <b>DEAD/DEAH box helicase domain-containing protein</b> | 67% identity to DEAD/DEAH box helicase domain protein [Rmag_0942] [ <i>Candidatus Ruthia magnifica</i> ]                     | Gammaproteobacteria (GSO-EOSA-1)                | 0 | 0 | 0 | 2 | 0  | 0  | 0  | 3  |  |
| <b>DEAD/DEAH box helicase domain-containing protein</b> | 86% identity to DEAD/DEAH box helicase domain protein [Nmar_1182] [ <i>Nitrosopumilus maritimus</i> (strain SCM1)]           | Marine Group I Crenarchaeota (Nitrosopumilales) | 0 | 0 | 0 | 7 | 0  | 0  | 0  | 24 |  |
|                                                         |                                                                                                                              |                                                 |   |   |   |   |    |    |    |    |  |
| <i>Nucleic acid OB-fold proteins</i>                    |                                                                                                                              |                                                 |   |   |   |   |    |    |    |    |  |
| <b>Nucleic acid binding OB-fold tRNA/helicase</b>       | 78% identity to nucleic acid binding OB-fold tRNA/helicase-type [Nmar_0089] [ <i>Nitrosopumilus maritimus</i> (strain SCM1)] | Marine Group I Crenarchaeota (Nitrosopumilales) | 0 | 0 | 0 | 2 | 0  | 0  | 0  | 2  |  |
| <b>Nucleic acid binding OB-fold</b>                     | 74% identity to Putative uncharacterized protein with OB fold [Nmar_0505] [ <i>Nitrosopumilus maritimus</i> (strain SCM1)]   | Marine Group I Crenarchaeota (Nitrosopumilales) | 0 | 0 | 0 | 2 | 0  | 0  | 0  | 3  |  |
|                                                         |                                                                                                                              |                                                 |   |   |   |   |    |    |    |    |  |
| <i>Ribonucleases (other)</i>                            |                                                                                                                              |                                                 |   |   |   |   |    |    |    |    |  |
| <b>RNase E/G</b>                                        | 91% identity to Ribonuclease E/G [Rne] [ <i>Candidatus Pelagibacter ubique</i> HTCC1062]                                     | Alphaproteobacteria (SAR11 cluster)             | 2 | 2 | 0 | 0 | 4  | 3  | 0  | 0  |  |
| <b>RNase E</b>                                          | 100% identity to Ribonuclease E [Rne] [ <i>Saccharophagus degradans</i> 2-40]                                                | Gammaproteobacteria (Alteromonadales)           | 2 | 0 | 0 | 0 | 8  | 0  | 0  | 0  |  |
| <b>RNase</b>                                            | 87% identity to RNase, metallo-beta-lactamase superfamily [Nmar_1727] [ <i>Nitrosopumilus maritimus</i> (strain SCM1)]       | Marine Group I Crenarchaeota (Nitrosopumilales) | 0 | 0 | 0 | 4 | 0  | 0  | 0  | 5  |  |
|                                                         |                                                                                                                              |                                                 |   |   |   |   |    |    |    |    |  |
| <b>TRANSLATION &amp; PROTEIN CHAPERONES</b>             |                                                                                                                              |                                                 |   |   |   |   |    |    |    |    |  |
| <i>Ribosomal subunits</i>                               |                                                                                                                              |                                                 |   |   |   |   |    |    |    |    |  |
| <b>Ribosomal protein S1</b>                             | 100% identity to 30S ribosomal protein S1 [ <i>Candidatus Pelagibacter ubique</i> HTCC1062]                                  | Alphaproteobacteria (SAR11 cluster)             | 7 | 8 | 0 | 0 | 18 | 16 | 0  | 0  |  |
| <b>Ribosomal protein S2</b>                             | 100% identity to 30S ribosomal protein [ <i>Candidatus Pelagibacter ubique</i> HTCC1062]                                     | Alphaproteobacteria (SAR11 cluster)             | 3 | 3 | 0 | 0 | 3  | 4  | 0  | 0  |  |

|                                 |                                                                                                                                |                                                                       |   |   |   |   |    |   |    |    |
|---------------------------------|--------------------------------------------------------------------------------------------------------------------------------|-----------------------------------------------------------------------|---|---|---|---|----|---|----|----|
| <b>Ribosomal protein L3</b>     | 82% identity to 50S ribosomal protein L3<br>[ <i>Candidatus</i> Pelagibacter ubique HTCC1002]                                  | Alphaproteobacteria<br>(SAR11 cluster)                                | 0 | 0 | 4 | 2 | 0  | 0 | 6  | 2  |
| <b>Ribosomal protein S4</b>     | 95% identity to 30S ribosomal protein S4<br>[ <i>Candidatus</i> Pelagibacter ubique HTCC1062]                                  | Alphaproteobacteria<br>(SAR11 cluster)                                | 0 | 0 | 4 | 5 | 0  | 0 | 11 | 10 |
| <b>Ribosomal protein S7</b>     | 98% identity to 30S ribosomal protein S7<br>[ <i>Candidatus</i> Pelagibacter ubique HTCC1062]                                  | Alphaproteobacteria<br>(SAR11 cluster)                                | 0 | 0 | 3 | 1 | 0  | 0 | 5  | 1  |
| <b>Ribosomal protein S8</b>     | 88% identity to 30S ribosomal protein S8<br>[ <i>Candidatus</i> Pelagibacter ubique HTCC1002]                                  | Alphaproteobacteria<br>(SAR11 cluster)                                | 0 | 0 | 5 | 0 | 0  | 0 | 10 | 0  |
| <b>Ribosomal protein S10</b>    | 97% identity to 30S ribosomal protein S10<br>[ <i>Candidatus</i> Pelagibacter ubique HTCC1062]                                 | Alphaproteobacteria<br>(SAR11 cluster)                                | 1 | 0 | 2 | 0 | 1  | 0 | 6  | 0  |
| <b>Ribosomal protein S12</b>    | 94% identity to 30S ribosomal protein S12<br>[ <i>Candidatus</i> Pelagibacter ubique HTCC1062]                                 | Alphaproteobacteria<br>(SAR11 cluster)                                | 0 | 0 | 2 | 1 | 0  | 0 | 7  | 1  |
| <b>Ribosomal protein S16</b>    | 92% identity to 30S ribosomal protein S16<br>[ <i>Candidatus</i> Pelagibacter ubique HTCC1002]                                 | Alphaproteobacteria<br>(SAR11 cluster)                                | 0 | 0 | 3 | 4 | 0  | 0 | 9  | 17 |
| <b>Ribosomal protein L1</b>     | 91% identity to 50S ribosomal protein L1<br>[ <i>Candidatus</i> Pelagibacter ubique HTCC1002]                                  | Alphaproteobacteria<br>(SAR11 cluster)                                | 0 | 0 | 7 | 1 | 0  | 0 | 8  | 2  |
| <b>Ribosomal protein L2</b>     | 91% identity to 50S ribosomal protein L2<br>[ <i>Candidatus</i> Pelagibacter ubique HTCC1002]                                  | Alphaproteobacteria<br>(SAR11 cluster)                                | 0 | 0 | 2 | 2 | 0  | 0 | 4  | 3  |
| <b>Ribosomal protein L4</b>     | 85% identity to 50S ribosomal protein L4<br>[ <i>Candidatus</i> Pelagibacter ubique HTCC1062]                                  | Alphaproteobacteria<br>(SAR11 cluster)                                | 0 | 0 | 3 | 2 | 0  | 0 | 7  | 2  |
| <b>Ribosomal protein L6</b>     | 100% identity to 50S ribosomal protein L6<br>[ <i>Candidatus</i> Pelagibacter ubique HTCC1062]                                 | Alphaproteobacteria<br>(SAR11 cluster)                                | 2 | 0 | 0 | 0 | 6  | 0 | 0  | 0  |
| <b>Ribosomal protein L7/L12</b> | 89% identity to 50S ribosomal protein L7/L12<br>[ <i>Candidatus</i> Pelagibacter sp. HTCC7211]                                 | Alphaproteobacteria<br>(SAR11 cluster)                                | 0 | 0 | 2 | 0 | 0  | 0 | 3  | 0  |
| <b>Ribosomal protein L25</b>    | 90% identity to 50S ribosomal protein L25<br>(General stress protein CTC) [ <i>Candidatus</i><br>Pelagibacter ubique HTCC1002] | Alphaproteobacteria<br>(SAR11 cluster)                                | 0 | 0 | 1 | 3 | 0  | 0 | 1  | 7  |
| <b>Ribosomal protein S1</b>     | 92% identity to 30S ribosomal protein S1<br>[ <i>Roseobacter</i> sp. MED193]                                                   | Alphaproteobacteria<br>(Rhodobacterales,<br><i>Roseobacter</i> clade) | 0 | 0 | 2 | 0 | 0  | 0 | 2  | 0  |
| <b>Ribosomal protein S7</b>     | 100% identity to 30S ribosomal protein S7<br>[ <i>Roseobacter denitrificans</i> OCh 114]                                       | Alphaproteobacteria<br>(Rhodobacterales,<br><i>Roseobacter</i> clade) | 2 | 0 | 0 | 0 | 3  | 0 | 0  | 0  |
| <b>Ribosomal protein S11</b>    | 100% identity to 30S ribosomal protein S11<br>[ <i>Roseobacter</i> sp. CCS2]                                                   | Alphaproteobacteria<br>(Rhodobacterales,<br><i>Roseobacter</i> clade) | 3 | 0 | 0 | 0 | 7  | 0 | 0  | 0  |
| <b>Ribosomal protein L7/L12</b> | 100% identity to 50S ribosomal protein L7/L12<br>[ <i>Roseovarius nubinhibens</i> ISM]                                         | Alphaproteobacteria<br>(Rhodobacterales,<br><i>Roseobacter</i> clade) | 0 | 0 | 2 | 0 | 0  | 0 | 3  | 0  |
| <b>Ribosomal protein L7/L12</b> | 100% identity to 50S ribosomal protein L7/L12<br>[ <i>Roseovarius nubinhibens</i> ISM]                                         | Alphaproteobacteria<br>(Rhodobacterales,<br><i>Roseobacter</i> clade) | 3 | 1 | 0 | 0 | 9  | 1 | 0  | 0  |
| <b>Ribosomal protein S10</b>    | 100% identity to 30S ribosomal protein S10<br>[ <i>Ruegeria pomeroyi</i> DSS-3]                                                | Alphaproteobacteria<br>(Rhodobacterales,<br><i>Roseobacter</i> clade) | 2 | 0 | 2 | 0 | 11 | 0 | 9  | 0  |

|                              |                                                                                              |                                                                       |   |   |   |   |    |   |    |   |
|------------------------------|----------------------------------------------------------------------------------------------|-----------------------------------------------------------------------|---|---|---|---|----|---|----|---|
| <b>Ribosomal protein L14</b> | 100% identity to 50S ribosomal protein L14<br>[ <i>Paracoccus denitrificans</i> PD1222]      | Alphaproteobacteria<br>(Rhodobacterales)                              | 2 | 0 | 0 | 0 | 4  | 0 | 0  | 0 |
| <b>Ribosomal protein L22</b> | 100% identity to 50S ribosomal protein L22<br>[ <i>Octadecabacter antarcticus</i> 307]       | Alphaproteobacteria<br>(Rhodobacterales,<br><i>Roseobacter</i> clade) | 2 | 0 | 0 | 0 | 4  | 0 | 0  | 0 |
| <b>Ribosomal protein S1</b>  | 100% identity to 30S ribosomal protein S1<br>[ <i>Sphingopyxis alaskensis</i> RB2256]        | Alphaproteobacteria<br>(Sphingomonadales)                             | 3 | 0 | 0 | 0 | 3  | 0 | 0  | 0 |
| <b>Ribosomal protein S2</b>  | 100% identity to 30S ribosomal protein S2<br>[ <i>Moritella</i> sp. PE36]                    | Gammaproteobacteria<br>(Alteromonadales)                              | 3 | 0 | 0 | 0 | 9  | 0 | 0  | 0 |
| <b>Ribosomal protein S3</b>  | 100% identity to 30S ribosomal protein S3<br>[ <i>Moritella</i> sp. PE36]                    | Gammaproteobacteria<br>(Alteromonadales)                              | 2 | 0 | 0 | 0 | 3  | 0 | 0  | 0 |
| <b>Ribosomal protein S4</b>  | 100% identity to 30S ribosomal protein S4<br>[ <i>Moritella</i> sp. PE36]                    | Gammaproteobacteria<br>(Alteromonadales)                              | 5 | 0 | 0 | 0 | 9  | 0 | 0  | 0 |
| <b>Ribosomal protein S7</b>  | 100% identity to 30S ribosomal protein S7<br>[ <i>Moritella</i> sp. PE36]                    | Gammaproteobacteria<br>(Alteromonadales)                              | 2 | 0 | 0 | 0 | 7  | 0 | 0  | 0 |
| <b>Ribosomal protein S8</b>  | 100% identity to 30S ribosomal protein S8<br>[ <i>Moritella</i> sp. PE36]                    | Gammaproteobacteria<br>(Alteromonadales)                              | 3 | 0 | 0 | 0 | 3  | 0 | 0  | 0 |
| <b>Ribosomal protein S11</b> | 100% identity to 30S ribosomal protein S11<br>[ <i>Moritella</i> sp. PE36]                   | Gammaproteobacteria<br>(Alteromonadales)                              | 3 | 0 | 0 | 0 | 4  | 0 | 0  | 0 |
| <b>Ribosomal protein S16</b> | 100% identity to 30S ribosomal protein S16<br>[ <i>Moritella</i> sp. PE36]                   | Gammaproteobacteria<br>(Alteromonadales)                              | 2 | 0 | 0 | 0 | 3  | 0 | 0  | 0 |
| <b>Ribosomal protein L9</b>  | 100% identity to 50S ribosomal protein L9<br>[ <i>Moritella</i> sp. PE36]                    | Gammaproteobacteria<br>(Alteromonadales)                              | 2 | 0 | 0 | 0 | 8  | 0 | 0  | 0 |
| <b>Ribosomal protein L2</b>  | 100% identity to 50S ribosomal protein L2<br>[ <i>Pseudoalteromonas haloplanktis</i> TAC125] | Gammaproteobacteria<br>(Alteromonadales)                              | 2 | 0 | 0 | 0 | 3  | 0 | 0  | 0 |
| <b>Ribosomal protein L4</b>  | 100% identity to 50S ribosomal protein L4<br>[ <i>Pseudoalteromonas haloplanktis</i> TAC125] | Gammaproteobacteria<br>(Alteromonadales)                              | 2 | 0 | 0 | 0 | 4  | 0 | 0  | 0 |
| <b>Ribosomal protein L1</b>  | 100% identity to 50S ribosomal protein L1<br>[ <i>Psychromonas ingrahamii</i> 37]            | Gammaproteobacteria<br>(Alteromonadales)                              | 3 | 0 | 0 | 0 | 10 | 0 | 0  | 0 |
| <b>Ribosomal protein S9</b>  | 82% identity to 30S ribosomal protein S9<br>[ <i>Glaciecola</i> sp. HTCC2999]                | Gammaproteobacteria<br>(Alteromonadales)                              | 0 | 0 | 4 | 0 | 0  | 0 | 12 | 0 |
| <b>Ribosomal protein S1</b>  | 100% identity to 30S ribosomal protein S1<br>[Alteromonadales bacterium TW-7]                | Gammaproteobacteria<br>(Alteromonadales)                              | 7 | 0 | 0 | 0 | 7  | 0 | 0  | 0 |
| <b>Ribosomal protein L24</b> | 100% identity to 50S ribosomal protein S3<br>[Alteromonadales bacterium TW-7]                | Gammaproteobacteria<br>(Alteromonadales)                              | 2 | 0 | 0 | 0 | 2  | 0 | 0  | 0 |
| <b>Ribosomal protein S5</b>  | 100% identity to 30S ribosomal protein S5<br>[Alteromonadales bacterium TW-7]                | Gammaproteobacteria<br>(Alteromonadales)                              | 4 | 0 | 0 | 0 | 8  | 0 | 0  | 0 |
| <b>Ribosomal protein S8</b>  | 100% identity to 30S ribosomal protein S8<br>[Alteromonadales bacterium TW-7]                | Gammaproteobacteria<br>(Alteromonadales)                              | 2 | 0 | 0 | 0 | 3  | 0 | 0  | 0 |
| <b>Ribosomal protein L1</b>  | 100% identity to 50S ribosomal protein L1<br>[Alteromonadales bacterium TW-7]                | Gammaproteobacteria<br>(Alteromonadales)                              | 2 | 0 | 0 | 0 | 3  | 0 | 0  | 0 |
| <b>Ribosomal protein L3</b>  | 100% identity to 50S ribosomal protein L3<br>[Alteromonadales bacterium TW-7]                | Gammaproteobacteria<br>(Alteromonadales)                              | 3 | 0 | 0 | 0 | 11 | 0 | 0  | 0 |

|                                 |                                                                                    |                                         |   |   |   |   |    |   |    |   |
|---------------------------------|------------------------------------------------------------------------------------|-----------------------------------------|---|---|---|---|----|---|----|---|
| <b>Ribosomal protein L15</b>    | 100% identity to 50S ribosomal protein L15 [Alteromonadales bacterium TW-7]        | Gammaproteobacteria (Alteromonadales)   | 2 | 0 | 0 | 0 | 5  | 0 | 0  | 0 |
| <b>Ribosomal protein L7/L12</b> | 100% identity to 50S ribosomal protein L7/L12 [Alteromonadales bacterium TW-7]     | Gammaproteobacteria (Alteromonadales)   | 2 | 0 | 0 | 0 | 2  | 0 | 0  | 0 |
| <b>Ribosomal protein L9</b>     | 100% identity to 50S ribosomal protein L9 [Alteromonadales bacterium TW-7]         | Gammaproteobacteria (Alteromonadales)   | 3 | 0 | 0 | 0 | 11 | 0 | 0  | 0 |
| <b>Ribosomal protein L14</b>    | 100% identity to 50S ribosomal protein L14 [Alteromonadales bacterium TW-7]        | Gammaproteobacteria (Alteromonadales)   | 2 | 0 | 0 | 0 | 2  | 0 | 0  | 0 |
| <b>Ribosomal protein L24</b>    | 100% identity to 50S ribosomal protein L24 [Alteromonadales bacterium TW-7]        | Gammaproteobacteria (Alteromonadales)   | 2 | 0 | 0 | 0 | 3  | 0 | 0  | 0 |
| <b>Ribosomal protein L16</b>    | 100% identity to 50S ribosomal protein L16 [ <i>Teredinibacter turnerae</i> T7901] | Gammaproteobacteria (Alteromonadales)   | 2 | 0 | 0 | 0 | 3  | 0 | 0  | 0 |
| <b>Ribosomal protein L1</b>     | 78% identity to 50S ribosomal protein L1 [ <i>Thioalkalivibrio</i> sp. HL-EbGR7]   | Gammaproteobacteria (Chromatiales)      | 0 | 0 | 8 | 2 | 0  | 0 | 29 | 5 |
| <b>Ribosomal protein S1</b>     | 79% identity to 30S ribosomal protein S1 [ <i>Oceanospirillum</i> sp. MED92]       | Gammaproteobacteria (Oceanospirillales) | 0 | 0 | 8 | 0 | 0  | 0 | 21 | 0 |
| <b>Ribosomal protein S1</b>     | 73% identity to 30S ribosomal protein S1 [ <i>Oceanospirillum</i> sp. MED92]       | Gammaproteobacteria (Oceanospirillales) | 0 | 0 | 3 | 0 | 0  | 0 | 3  | 0 |
| <b>Ribosomal protein S2</b>     | 77% identity to 30S ribosomal protein S2 [ <i>Oceanospirillum</i> sp. MED92]       | Gammaproteobacteria (Oceanospirillales) | 0 | 0 | 6 | 1 | 0  | 0 | 16 | 7 |
| <b>Ribosomal protein S3</b>     | 85% identity to 30S ribosomal protein S3 [ <i>Oceanospirillum</i> sp. MED92]       | Gammaproteobacteria (Oceanospirillales) | 0 | 0 | 4 | 3 | 0  | 0 | 16 | 4 |
| <b>Ribosomal protein S7</b>     | 83% identity to 30S ribosomal protein S7 [ <i>Oceanospirillum</i> sp. MED92]       | Gammaproteobacteria (Oceanospirillales) | 0 | 0 | 4 | 0 | 0  | 0 | 10 | 0 |
| <b>Ribosomal protein L5</b>     | 85% identity to 50S ribosomal protein L5 [ <i>Oceanospirillum</i> sp. MED92]       | Gammaproteobacteria (Oceanospirillales) | 0 | 0 | 2 | 0 | 0  | 0 | 2  | 0 |
| <b>Ribosomal protein L14</b>    | 93% identity to 50S ribosomal protein L14 [ <i>Oceanospirillum</i> sp. MED92]      | Gammaproteobacteria (Oceanospirillales) | 0 | 0 | 4 | 0 | 0  | 0 | 7  | 0 |
| <b>Ribosomal protein L15</b>    | 81% identity to 50S ribosomal protein L15 [ <i>Oceanospirillum</i> sp. MED92]      | Gammaproteobacteria (Oceanospirillales) | 0 | 0 | 4 | 0 | 0  | 0 | 7  | 0 |
| <b>Ribosomal protein S19</b>    | 89% identity to 30S ribosomal protein S19 [ <i>Oceanospirillum</i> sp. MED92]      | Gammaproteobacteria (Oceanospirillales) | 0 | 0 | 3 | 0 | 0  | 0 | 4  | 0 |
| <b>Ribosomal protein L22</b>    | 83% identity to 50S ribosomal protein L22 [ <i>Oceanospirillum</i> sp. MED92]      | Gammaproteobacteria (Oceanospirillales) | 0 | 0 | 2 | 0 | 0  | 0 | 4  | 0 |
| <b>Ribosomal protein L3</b>     | 78% identity to 50S ribosomal protein L3 [ <i>Marinomonas mediterranea</i> MMB-1]  | Gammaproteobacteria (Oceanospirillales) | 0 | 0 | 5 | 2 | 0  | 0 | 20 | 2 |
| <b>Ribosomal protein L10</b>    | 80% identity to 50S ribosomal protein L10 [ <i>Marinomonas mediterranea</i> MMB-1] | Gammaproteobacteria (Oceanospirillales) | 0 | 0 | 3 | 0 | 0  | 0 | 4  | 0 |
| <b>Ribosomal protein L20</b>    | 87% identity to 50S ribosomal protein L20 [ <i>Marinomonas mediterranea</i> MMB-1] | Gammaproteobacteria (Oceanospirillales) | 0 | 0 | 4 | 0 | 0  | 0 | 6  | 0 |
| <b>Ribosomal protein S10</b>    | 92% identity to 30S ribosomal protein S10 [ <i>Marinomonas</i> sp. MWYL1]          | Gammaproteobacteria (Oceanospirillales) | 0 | 0 | 4 | 0 | 0  | 0 | 9  | 0 |

|                                       |                                                                                                                   |                                         |   |   |   |   |   |   |    |    |
|---------------------------------------|-------------------------------------------------------------------------------------------------------------------|-----------------------------------------|---|---|---|---|---|---|----|----|
| <b>Ribosomal protein L19</b>          | 85% identity to 50S ribosomal protein L19 [ <i>Marinobacter aquaeolei</i> VT8]                                    | Gammaproteobacteria (Alteromonadales)   | 0 | 0 | 2 | 0 | 0 | 0 | 4  | 0  |
| <b>Ribosomal protein L21</b>          | 81% identity to 50S ribosomal protein L21 [ <i>Marinobacter aquaeolei</i> (strain ATCC 700491 / DSM 11845 / VT8)] | Gammaproteobacteria (Alteromonadales)   | 0 | 0 | 4 | 0 | 0 | 0 | 4  | 0  |
| <b>Ribosomal protein S4</b>           | 77% identity to 30S ribosomal protein S4 [ <i>Oceanobacter</i> sp. RED65]                                         | Gammaproteobacteria (Oceanospirillales) | 0 | 0 | 6 | 2 | 0 | 0 | 16 | 3  |
| <b>Ribosomal protein S6</b>           | 75% identity to 30S ribosomal protein S6 [ <i>Oceanobacter</i> sp. RED65]                                         | Gammaproteobacteria (Oceanospirillales) | 0 | 0 | 2 | 0 | 0 | 0 | 4  | 0  |
| <b>Ribosomal protein L23</b>          | 76% identity to 50S ribosomal protein L23 [ <i>Oceanobacter</i> sp. RED65]                                        | Gammaproteobacteria (Oceanospirillales) | 0 | 0 | 5 | 0 | 0 | 0 | 17 | 0  |
| <b>Ribosomal protein L13</b>          | 86% identity to 50S ribosomal protein L13 [ <i>Chromohalobacter salexigens</i> DSM 3043]                          | Gammaproteobacteria (Oceanospirillales) | 0 | 0 | 2 | 0 | 0 | 0 | 2  | 0  |
| <b>Ribosomal protein S3</b>           | 100% identity to 30S ribosomal protein S3 [ <i>Escherichia coli</i> O157:H7 EDL933] ( <i>likely contaminant</i> ) | Gammaproteobacteria (Enterobacteriales) | 0 | 4 | 0 | 0 | 0 | 5 | 0  | 0  |
| <b>Ribosomal protein L19</b>          | 100% identity to 50S ribosomal protein L19 [ <i>Chromohalobacter salexigens</i> DSM 3043]                         | Gammaproteobacteria (Oceanospirillales) | 2 | 0 | 0 | 0 | 3 | 0 | 0  | 0  |
| <b>Ribosomal protein S1</b>           | 100% identity to 30S ribosomal protein S1 [ <i>Klebsiella pneumoniae</i> subsp. <i>pneumoniae</i> MGH]            | Gammaproteobacteria (Enterobacteriales) | 0 | 2 | 0 | 0 | 0 | 2 | 0  | 0  |
| <b>R ribosomal protein S4</b>         | 100% identity to 30S ribosomal protein S4 [rpsD] [ <i>Shigella sonnei</i> (strain Ss046)]                         | Gammaproteobacteria (Enterobacteriales) | 1 | 2 | 0 | 0 | 1 | 3 | 0  | 0  |
| <b>Ribosomal protein L4</b>           | 75% identity to 50S ribosomal protein L4/L1 [ <i>Acinetobacter lwoffii</i> SH145]                                 | Gammaproteobacteria (Pseudomonadales)   | 0 | 0 | 3 | 0 | 0 | 0 | 9  | 0  |
| <b>Ribosomal protein L4/L1 family</b> | 65% identity to 50S ribosomal protein L4 [ <i>Acinetobacter johnsonii</i> SH046]                                  | Gammaproteobacteria (Pseudomonadales)   | 0 | 0 | 2 | 0 | 0 | 0 | 7  | 0  |
| <b>Ribosomal protein L18</b>          | 76% identity to 50S ribosomal protein L18 [ <i>Acinetobacter baumannii</i> SDF]                                   | Gammaproteobacteria (Pseudomonadales)   | 0 | 0 | 3 | 0 | 0 | 0 | 4  | 0  |
| <b>Ribosomal protein S7</b>           | 100% identity to 30S ribosomal protein S7 [ <i>Pseudomonas aeruginosa</i> PACS2]                                  | Gammaproteobacteria (Pseudomonadales)   | 3 | 0 | 0 | 0 | 9 | 0 | 0  | 0  |
| <b>Ribosomal protein S5</b>           | 86% identity 30S to ribosomal protein S5 [gamma proteobacterium NOR5-3]                                           | Gammaproteobacteria (OMG)               | 0 | 0 | 7 | 0 | 0 | 0 | 17 | 0  |
| <b>Ribosomal protein L16</b>          | 91% identity to 50S ribosomal protein L16 [gamma proteobacterium IMCC3088]                                        | Gammaproteobacteria (unclassified)      | 0 | 0 | 2 | 0 | 0 | 0 | 3  | 0  |
| <b>Ribosomal protein L11</b>          | 77% identity to 50S ribosomal protein L11 [ <i>Reinekea blandensis</i> MED297]                                    | Gammaproteobacteria (unclassified)      | 0 | 0 | 2 | 0 | 0 | 0 | 6  | 0  |
| <b>Ribosomal protein S1</b>           | 85% identity to 30S ribosomal protein S1 [uncultured SUP05 cluster bacterium]                                     | Gammaproteobacteria (GSO-EOSA-1)        | 0 | 0 | 0 | 2 | 0 | 0 | 0  | 4  |
| <b>Ribosomal protein S1</b>           | 83% identity to 30S ribosomal protein S1 [uncultured SUP05 cluster bacterium]                                     | Gammaproteobacteria (GSO-EOSA-1)        | 0 | 0 | 0 | 2 | 0 | 0 | 0  | 3  |
| <b>Ribosomal protein S1</b>           | 89% identity to 30S ribosomal protein S1 [uncultured SUP05 cluster bacterium]                                     | Gammaproteobacteria (GSO-EOSA-1)        | 0 | 0 | 3 | 4 | 0 | 0 | 4  | 10 |



|                                 |                                                                                                    |                                                 |   |   |   |   |   |   |    |    |
|---------------------------------|----------------------------------------------------------------------------------------------------|-------------------------------------------------|---|---|---|---|---|---|----|----|
| <b>Ribosomal protein L1P</b>    | 81% identity to 50S ribosomal protein L1P [uncultured SUP05 cluster bacterium]                     | Gammaproteobacteria (GSO-EOSA-1)                | 0 | 0 | 3 | 4 | 0 | 0 | 5  | 18 |
| <b>Ribosomal protein L3</b>     | 77% identity to 50S ribosomal protein L3 [uncultured SUP05 cluster bacterium]                      | Gammaproteobacteria (GSO-EOSA-1)                | 0 | 0 | 2 | 5 | 0 | 0 | 4  | 25 |
| <b>Ribosomal protein S2</b>     | 87% identity to 30S ribosomal protein S2 [ <i>Candidatus</i> Ruthia magnifica]                     | Gammaproteobacteria (GSO-EOSA-1)                | 0 | 0 | 1 | 2 | 0 | 0 | 1  | 5  |
| <b>Ribosomal protein S3P</b>    | 81% identity to 30S ribosomal protein S3 [ <i>Candidatus</i> Ruthia magnifica]                     | Gammaproteobacteria (GSO-EOSA-1)                | 0 | 0 | 0 | 2 | 0 | 0 | 0  | 3  |
| <b>Ribosomal protein L2</b>     | 72% identity to 50S ribosomal protein L2 [ <i>Candidatus</i> Ruthia magnifica]                     | Gammaproteobacteria (GSO-EOSA-1)                | 0 | 0 | 1 | 2 | 0 | 0 | 1  | 9  |
| <b>Ribosomal protein L4</b>     | 71% identity to 50S ribosomal protein L4 [ <i>Candidatus</i> Ruthia magnifica]                     | Gammaproteobacteria (GSO-EOSA-1)                | 0 | 0 | 0 | 3 | 0 | 0 | 0  | 6  |
| <b>Ribosomal protein S1</b>     | 56% identity to 30S ribosomal protein S1 [marine gamma proteobacterium HTCC2143]                   | Gammaproteobacteria (OMG)                       | 0 | 0 | 5 | 2 | 0 | 0 | 13 | 4  |
| <b>Ribosomal protein S7</b>     | 92% identity to 30S ribosomal protein S7 [marine gamma proteobacterium HTCC2207]                   | Gammaproteobacteria (OMG)                       | 0 | 0 | 2 | 0 | 0 | 0 | 4  | 0  |
| <b>Ribosomal protein S10</b>    | 100% identity to 30S ribosomal protein S10 [marine gamma proteobacterium HTCC2207]                 | Gammaproteobacteria (OMG)                       | 0 | 0 | 2 | 0 | 0 | 0 | 5  | 0  |
| <b>Ribosomal protein S17</b>    | 75% identity to 30S ribosomal protein S17 [marine gamma proteobacterium HTCC2143]                  | Gammaproteobacteria (OMG)                       | 0 | 0 | 3 | 0 | 0 | 0 | 5  | 0  |
| <b>Ribosomal protein S18</b>    | 83% identity to 30S ribosomal protein S18 [marine gamma proteobacterium HTCC2148]                  | Gammaproteobacteria (OMG)                       | 0 | 0 | 2 | 0 | 0 | 0 | 3  | 0  |
| <b>Ribosomal protein L2</b>     | 85% identity to 50S ribosomal protein L2 [marine gamma proteobacterium HTCC2143]                   | Gammaproteobacteria (OMG)                       | 0 | 0 | 3 | 2 | 0 | 0 | 19 | 3  |
| <b>Ribosomal protein L7/L12</b> | 75% identity to 50S ribosomal protein L7/L12 [ <i>Flavobacterium psychrophilum</i> JIP02/86]       | Bacteroidetes (Flavobacteria)                   | 0 | 0 | 2 | 0 | 0 | 0 | 2  | 0  |
| <b>Ribosomal protein L9</b>     | 66% identity to 50S ribosomal protein L9 [marine gamma proteobacterium HTCC2143]                   | Gammaproteobacteria (OMG)                       | 0 | 0 | 3 | 0 | 0 | 0 | 5  | 0  |
| <b>Ribosomal protein S2P</b>    | 79% identity to Ribosomal protein S2P [Nmar_0316] [ <i>Nitrosopumilus maritimus</i> (strain SCM1)] | Marine Group I Crenarchaeota (Nitrosopumilales) | 0 | 0 | 0 | 2 | 0 | 0 | 0  | 3  |
| <b>Ribosomal protein S3</b>     | 87% identity to Ribosomal protein S3 [Nmar_0804] [ <i>Nitrosopumilus maritimus</i> (strain SCM1)]  | Marine Group I Crenarchaeota (Nitrosopumilales) | 0 | 0 | 0 | 5 | 0 | 0 | 0  | 20 |
| <b>Ribosomal protein S4E</b>    | 82% identity to Ribosomal protein S4E [Nmar_0798] [ <i>Nitrosopumilus maritimus</i> (strain SCM1)] | Marine Group I Crenarchaeota (Nitrosopumilales) | 0 | 0 | 0 | 3 | 0 | 0 | 0  | 13 |
| <b>Ribosomal protein S4P</b>    | 78% identity to Ribosomal protein S4P [Nmar_0324] [ <i>Nitrosopumilus maritimus</i> SCM1]          | Marine Group I Crenarchaeota (Nitrosopumilales) | 0 | 0 | 0 | 3 | 0 | 0 | 0  | 31 |
| <b>Ribosomal protein S5P</b>    | 91% identity to Ribosomal protein S5 [Nmar_0399] [ <i>Nitrosopumilus maritimus</i> (strain SCM1)]  | Marine Group I Crenarchaeota (Nitrosopumilales) | 0 | 0 | 0 | 9 | 0 | 0 | 0  | 16 |

|                                               |                                                                                                                   |                                                 |   |   |   |   |    |    |   |    |
|-----------------------------------------------|-------------------------------------------------------------------------------------------------------------------|-------------------------------------------------|---|---|---|---|----|----|---|----|
| <b>Ribosomal protein S7P</b>                  | 84% identity to Ribosomal protein S7P [Nmar_0355] [ <i>Nitrosopumilus maritimus</i> (strain SCM1)]                | Marine Group I Crenarchaeota (Nitrosopumilales) | 0 | 0 | 0 | 3 | 0  | 0  | 0 | 4  |
| <b>Ribosomal protein S8e</b>                  | 74% identity to Ribosomal protein S8e [Nmar_0520] [ <i>Nitrosopumilus maritimus</i> (strain SCM1)]                | Marine Group I Crenarchaeota (Nitrosopumilales) | 0 | 0 | 0 | 2 | 0  | 0  | 0 | 2  |
| <b>Ribosomal protein S13P</b>                 | 83% identity to Ribosomal protein S13P [Nmar_0325] [ <i>Nitrosopumilus maritimus</i> (strain SCM1)]               | Marine Group I Crenarchaeota (Nitrosopumilales) | 0 | 0 | 0 | 2 | 0  | 0  | 0 | 3  |
| <b>Ribosomal protein L1</b>                   | 80% identity to Ribosomal protein L1 [Nmar_0382] [ <i>Nitrosopumilus maritimus</i> SCM1]                          | Marine Group I Crenarchaeota (Nitrosopumilales) | 0 | 0 | 0 | 5 | 0  | 0  | 0 | 14 |
| <b>Ribosomal protein L2</b>                   | 87% identity to 30S ribosomal protein L2P [Nmar_0102] [ <i>Nitrosopumilus maritimus</i> SCM1]                     | Marine Group I Crenarchaeota (Nitrosopumilales) | 0 | 0 | 0 | 7 | 0  | 0  | 0 | 18 |
| <b>Ribosomal protein L3</b>                   | 87% identity to Ribosomal protein L3 [Nmar_0809] [ <i>Nitrosopumilus maritimus</i> (strain SCM1)]                 | Marine Group I Crenarchaeota (Nitrosopumilales) | 0 | 0 | 0 | 4 | 0  | 0  | 0 | 19 |
| <b>Ribosomal protein L4P</b>                  | 72% identity to Ribosomal protein L4/L1e [Nmar_0808] [ <i>Nitrosopumilus maritimus</i> (strain SCM1)]             | Marine Group I Crenarchaeota (Nitrosopumilales) | 0 | 0 | 0 | 6 | 0  | 0  | 0 | 43 |
| <b>Ribosomal protein L6</b>                   | 77% identity to Ribosomal protein L6 [Nmar_0794] [ <i>Nitrosopumilus maritimus</i> (strain SCM1)]                 | Marine Group I Crenarchaeota (Nitrosopumilales) | 0 | 0 | 0 | 2 | 0  | 0  | 0 | 3  |
| <b>Ribosomal protein L10</b>                  | 77% identity to Ribosomal protein L10 [Nmar_0381] [ <i>Nitrosopumilus maritimus</i> (strain SCM1)]                | Marine Group I Crenarchaeota (Nitrosopumilales) | 0 | 0 | 0 | 7 | 0  | 0  | 0 | 31 |
| <b>Ribosomal protein L12P</b>                 | 98% identity to Ribosomal protein L12P [Nmar_0374] [ <i>Nitrosopumilus maritimus</i> (strain SCM1)]               | Marine Group I Crenarchaeota (Nitrosopumilales) | 0 | 0 | 0 | 3 | 0  | 0  | 0 | 3  |
| <b>Ribosomal protein L14b/L23e</b>            | 87% identity to Ribosomal protein L14P [Nmar_0800] [ <i>Nitrosopumilus maritimus</i> (strain SCM1)]               | Marine Group I Crenarchaeota (Nitrosopumilales) | 0 | 0 | 0 | 3 | 0  | 0  | 0 | 3  |
|                                               |                                                                                                                   |                                                 |   |   |   |   |    |    |   |    |
| <b>GTP-binding protein</b>                    |                                                                                                                   |                                                 |   |   |   |   |    |    |   |    |
| <b>GTP-binding protein</b>                    | 100% identity to GTP-binding protein [TypA] [ <i>Candidatus Pelagibacter ubique</i> HTCC1062]                     | Alphaproteobacteria (SAR11 cluster)             | 2 | 3 | 0 | 0 | 10 | 15 | 0 | 0  |
| <b>GTP-binding protein</b>                    | 67% identity to GTP-binding protein [TypA] [Rmag_0368] [ <i>Candidatus Ruthia magnifica</i> ]                     | Gammaaproteobacteria (GSO-EOSA-1)               | 0 | 0 | 0 | 2 | 0  | 0  | 0 | 3  |
|                                               |                                                                                                                   |                                                 |   |   |   |   |    |    |   |    |
| <b>Translation initiation factor 2 (IF-2)</b> |                                                                                                                   |                                                 |   |   |   |   |    |    |   |    |
| <b>Translation initiation factor 2</b>        | 100% identity to Translation initiation factor 2 (IF-2) [InfB] [ <i>Candidatus Pelagibacter ubique</i> HTCC1062], | Alphaproteobacteria (SAR11 cluster)             | 2 | 2 | 0 | 0 | 5  | 2  | 0 | 0  |





|                                         |                                                                                                                                    |                                                                 |   |   |    |    |    |    |    |    |
|-----------------------------------------|------------------------------------------------------------------------------------------------------------------------------------|-----------------------------------------------------------------|---|---|----|----|----|----|----|----|
| <b>Translation elongation factor Tu</b> | 88% identity to Translation elongation factor Tu (EF-Tu) [Tuf] [ <i>Candidatus Pelagibacter ubique</i> HTCC1062]                   | Alphaproteobacteria (SAR11 cluster)                             | 0 | 0 | 20 | 20 | 0  | 0  | 55 | 89 |
| <b>Translation elongation factor Tu</b> | 86% identity to Translation elongation factor Tu (EF-Tu) [Tuf] [ <i>Candidatus Pelagibacter</i> sp. HTCC7211]                      | Alphaproteobacteria (SAR11 cluster)                             | 0 | 0 | 1  | 3  | 0  | 0  | 1  | 9  |
| <b>Translation elongation factor Tu</b> | 100% identity to Translation elongation factor Tu (EF-Tu) [Tuf] [ <i>Candidatus Pelagibacter ubique</i> HTCC1002]                  | Alphaproteobacteria (SAR11 cluster)                             | 0 | 0 | 1  | 2  | 0  | 0  | 1  | 4  |
| <b>Translation elongation factor Tu</b> | 82% identity to Translation elongation factor Tu (EF-Tu) [Tuf] [ <i>Octadecabacter antarcticus</i> 307]                            | Alphaproteobacteria (Rhodobacterales, <i>Roseobacter</i> clade) | 0 | 0 | 2  | 2  | 0  | 0  | 3  | 2  |
| <b>Translation elongation factor Tu</b> | 100% identity to Translation elongation factor Tu (EF-Tu) [Tuf] [ <i>Sphingopyxis alaskensis</i> RB2256]                           | Alphaproteobacteria (Sphingomonadales)                          | 4 | 0 | 0  | 0  | 7  | 0  | 0  | 0  |
| <b>Translation elongation factor Tu</b> | 100% identity to Translation elongation factor Tu (EF-Tu) [Tuf] [ <i>Shewanella amazonensis</i> SB2B]                              | Gammaproteobacteria (Alteromonadales)                           | 2 | 0 | 0  | 0  | 3  | 0  | 0  | 0  |
| <b>Translation elongation factor Tu</b> | 100% identity to Translation elongation factor Tu (EF-Tu) [Tuf] [ <i>Moritella</i> sp. PE36]                                       | Gammaproteobacteria (Alteromonadales)                           | 6 | 0 | 0  | 0  | 17 | 0  | 0  | 0  |
| <b>Translation elongation factor Tu</b> | 100% identity to Translation elongation factor Tu (EF-Tu) [Tuf] [ <i>Colwellia psychrerythraea</i> 34H]                            | Gammaproteobacteria (Alteromonadales)                           | 6 | 1 | 0  | 0  | 11 | 1  | 0  | 0  |
| <b>Translation elongation factor Tu</b> | 100% identity to Translation elongation factor Tu (EF-Tu) [Tuf] [ <i>Allochromatium vinosum</i> DSM 180]                           | Gammaproteobacteria (Chromatiales)                              | 2 | 0 | 0  | 0  | 5  | 0  | 0  | 0  |
| <b>Translation elongation factor Tu</b> | 83% identity to Translation elongation factor Tu (EF-Tu) [Tuf] [ <i>Neptuniibacter caesariensis</i> ]                              | Gammaproteobacteria (Oceanospirillales)                         | 0 | 0 | 2  | 1  | 0  | 0  | 12 | 4  |
| <b>Translation elongation factor Tu</b> | 100% identity to Translation elongation factor Tu (EF-Tu) [Tuf] [ <i>Alcanivorax borkumensis</i> SK2]                              | Gammaproteobacteria (Oceanospirillales)                         | 0 | 2 | 0  | 0  | 0  | 7  | 0  | 0  |
| <b>Translation elongation factor Tu</b> | 100% identity to Translation elongation factor Tu (EF-Tu) [Tuf] [ <i>Klebsiella pneumoniae</i> subsp. <i>pneumoniae</i> MGH 78578] | Gammaproteobacteria (Enterobacteriales)                         | 5 | 6 | 0  | 0  | 25 | 14 | 0  | 0  |
| <b>Translation elongation factor Tu</b> | 100% identity to Translation elongation factor Tu (EF-Tu) [Tuf] [ <i>Coxiella burnetii</i> ]                                       | Gammaproteobacteria (Legionellales)                             | 0 | 2 | 0  | 0  | 0  | 3  | 0  | 0  |
| <b>Translation elongation factor Tu</b> | 90% identity to Translation elongation factor Tu (EF-Tu) [Tuf] [uncultured marine gamma proteobacterium EB000-45B06]               | Gammaproteobacteria (unclassified)                              | 0 | 0 | 4  | 1  | 0  | 0  | 8  | 4  |
| <b>Translation elongation factor Tu</b> | 92% identity to Translation elongation factor Tu (EF-Tu) [Tuf] [uncultured gamma proteobacterium HF0010_16J05]                     | Gammaproteobacteria (unclassified)                              | 0 | 0 | 3  | 1  | 0  | 0  | 10 | 2  |
| <b>Translation elongation factor Tu</b> | 86% identity to Elongation factor Tu 2 (EF-Tu 2) [Tuf2] [ <i>Candidatus Ruthia magnifica</i> ]                                     | Gammaproteobacteria (GSO-EOSA-1)                                | 0 | 0 | 8  | 16 | 0  | 0  | 19 | 96 |
| <b>Translation elongation factor Tu</b> | 89% identity to Translation elongation factor Tu (EF-Tu) [Tuf] [marine gamma proteobacterium HTCC2143]                             | Gammaproteobacteria (OMG)                                       | 0 | 0 | 2  | 1  | 0  | 0  | 4  | 1  |
| <b>Translation elongation factor Tu</b> | 100% identity to Translation elongation factor Tu (EF-Tu) [Tuf] [ <i>Polaribacter</i> sp. MED152]                                  | Bacteroidetes (Flavobacteria)                                   | 2 | 1 | 0  | 0  | 3  | 1  | 0  | 0  |



|                                                        |                                                                                                                  |                                                                       |    |   |   |    |    |    |   |    |
|--------------------------------------------------------|------------------------------------------------------------------------------------------------------------------|-----------------------------------------------------------------------|----|---|---|----|----|----|---|----|
| <b>Trigger factor</b>                                  |                                                                                                                  |                                                                       |    |   |   |    |    |    |   |    |
| <b>Trigger factor</b>                                  | 100% identity to Trigger factor (TF) [Tig]<br>[ <i>Candidatus Pelagibacter ubique</i> HTCC1062]                  | Alphaproteobacteria<br>(SAR11 cluster)                                | 1  | 2 | 0 | 0  | 1  | 5  | 0 | 0  |
| <b>Trigger factor</b>                                  | 92% identity to Trigger factor (TF) [Tig]<br>[ <i>Candidatus Pelagibacter ubique</i> HTCC1002]                   | Alphaproteobacteria<br>(SAR11 cluster)                                | 0  | 0 | 2 | 0  | 0  | 0  | 2 | 0  |
| <b>Trigger factor</b>                                  | 100% identity to Trigger factor (TF) [Tig]<br>[ <i>Moritella</i> sp. PE36]                                       | Gammaproteobacteria<br>(Alteromonadales)                              | 4  | 0 | 0 | 0  | 5  | 0  | 0 | 0  |
| <b>Trigger factor</b>                                  | 52% identity to Trigger factor (TF) [Tig]<br>[ <i>Marinomonas</i> sp. (strain MWYL1)]                            | Gammaproteobacteria<br>(Oceanospirillales)                            | 0  | 0 | 3 | 1  | 0  | 0  | 9 | 1  |
|                                                        |                                                                                                                  |                                                                       |    |   |   |    |    |    |   |    |
| <b>Peptidylprolyl isomerase (PpiC-type)</b>            |                                                                                                                  |                                                                       |    |   |   |    |    |    |   |    |
| <b>Peptidyl-prolyl cis-trans isomerase (PpiC-type)</b> | 100% identity to PpiC-type peptidyl-prolyl cis-trans isomerase [ <i>Sphingopyxis alaskensis</i> RB2256]          | Alphaproteobacteria<br>(Sphingomonadales)                             | 2  | 0 | 0 | 0  | 2  | 0  | 0 | 0  |
| <b>Peptidyl-prolyl cis-trans isomerase (PpiC-type)</b> | 42% identity to PpiC-type peptidyl-prolyl cis-trans isomerase [Rmag_0656] [ <i>Candidatus Ruthia magnifica</i> ] | Gammaproteobacteria<br>(GSO-EOSA-1)                                   | 0  | 0 | 0 | 3  | 0  | 0  | 0 | 7  |
|                                                        |                                                                                                                  |                                                                       |    |   |   |    |    |    |   |    |
| <b>Peptidylprolyl isomerase (FKBP-type)</b>            |                                                                                                                  |                                                                       |    |   |   |    |    |    |   |    |
| <b>Peptidylprolyl cis-trans isomerase (FKBP-type)</b>  | 86% identity to Peptidylprolyl isomerase FKBP-type [Nmar_1730] [ <i>Nitrosopumilus maritimus</i> (strain SCM1)]  | Marine Group I<br>Crenarchaeota<br>(Nitrosopumilales)                 | 0  | 0 | 0 | 16 | 0  | 0  | 0 | 65 |
|                                                        |                                                                                                                  |                                                                       |    |   |   |    |    |    |   |    |
| <b>DnaK chaperonin</b>                                 |                                                                                                                  |                                                                       |    |   |   |    |    |    |   |    |
| <b>DnaK</b>                                            | 100% identity Chaperone protein DnaK<br>[ <i>Candidatus Pelagibacter ubique</i> HTCC1062]                        | Alphaproteobacteria<br>(SAR11 cluster)                                | 10 | 7 | 0 | 0  | 38 | 21 | 0 | 0  |
| <b>DnaK</b>                                            | 87% identity to Chaperone protein DnaK<br>[ <i>Octadecabacter antarcticus</i> 307]                               | Alphaproteobacteria<br>(Rhodobacterales,<br><i>Roseobacter</i> clade) | 6  | 2 | 0 | 0  | 49 | 20 | 0 | 0  |
| <b>DnaK</b>                                            | 40% identity to Chaperone protein DnaK<br>[ <i>Oceanicola granulosis</i> HTCC2516]                               | Alphaproteobacteria<br>(Rhodobacterales,<br><i>Roseobacter</i> clade) | 0  | 0 | 0 | 3  | 0  | 0  | 0 | 11 |
| <b>DnaK</b>                                            | 100% identity to Chaperone protein DnaK<br>[ <i>Sphingopyxis alaskensis</i> RB2256]                              | Alphaproteobacteria<br>(Sphingomonadales)                             | 2  | 0 | 0 | 0  | 5  | 0  | 0 | 0  |
| <b>DnaK</b>                                            | 86% identity to Chaperone protein DnaK<br>[ <i>Marinomonas</i> sp. (strain MWYL1)]                               | Gammaproteobacteria<br>(Oceanospirillales)                            | 0  | 0 | 4 | 2  | 0  | 0  | 6 | 2  |
| <b>DnaK</b>                                            | 80% identity to Chaperone protein DnaK<br>[ <i>Marinomonas</i> sp. (strain MWYL1)]                               | Gammaproteobacteria<br>(Oceanospirillales)                            | 0  | 0 | 3 | 0  | 0  | 0  | 5 | 0  |
| <b>DnaK</b>                                            | 80% identity to Chaperone protein DnaK<br>[ <i>Candidatus Ruthia magnifica</i> ]                                 | Gammaproteobacteria<br>(GSO-EOSA-1)                                   | 0  | 0 | 0 | 7  | 0  | 0  | 0 | 25 |

|                         |                                                                                                                                   |                                                                       |    |    |    |    |     |    |    |    |
|-------------------------|-----------------------------------------------------------------------------------------------------------------------------------|-----------------------------------------------------------------------|----|----|----|----|-----|----|----|----|
| <b>DnaK</b>             | 86% identity to Chaperone protein DnaK<br>[ <i>Nitrosopumilus maritimus</i> (strain SCM1)]                                        | Marine Group I<br>Crenarchaeota<br>(Nitrosopumilales)                 | 0  | 0  | 0  | 13 | 0   | 0  | 0  | 62 |
| <b>DnaK</b>             | 89% identity to Chaperone protein DnaK<br>[ <i>Nitrosopumilus maritimus</i> (strain SCM1)]                                        | Marine Group I<br>Crenarchaeota<br>(Nitrosopumilales)                 | 0  | 0  | 0  | 4  | 0   | 0  | 0  | 6  |
|                         |                                                                                                                                   |                                                                       |    |    |    |    |     |    |    |    |
| <b>GroEL chaperonin</b> |                                                                                                                                   |                                                                       |    |    |    |    |     |    |    |    |
| <b>GroEL</b>            | 92% identity to GroEL protein (Chaperonin)<br>(Protein Cpn60) [GroL] [ <i>Candidatus</i><br><i>Pelagibacter ubique</i> HTCC1062]  | Alphaproteobacteria<br>(SAR11 cluster)                                | 0  | 0  | 23 | 21 | 0   | 0  | 93 | 69 |
| <b>GroEL</b>            | 100% identity to GroEL protein (Chaperonin)<br>(Protein Cpn60) [GroL] [ <i>Candidatus</i><br><i>Pelagibacter ubique</i> HTCC1062] | Alphaproteobacteria<br>(SAR11 cluster)                                | 2  | 3  | 0  | 0  | 7   | 5  | 0  | 0  |
| <b>GroEL</b>            | 85% identity to GroEL protein (Chaperonin)<br>(Protein Cpn60) [GroL] [ <i>Candidatus</i><br><i>Pelagibacter ubique</i> HTCC1062]  | Alphaproteobacteria<br>(SAR11 cluster)                                | 0  | 0  | 2  | 1  | 0   | 0  | 5  | 1  |
| <b>GroEL</b>            | 58% identity to GroEL protein (Chaperonin)<br>(Protein Cpn60) [GroL] [ <i>Candidatus</i><br><i>Pelagibacter ubique</i> HTCC1062]  | Alphaproteobacteria<br>(SAR11 cluster)                                | 0  | 0  | 2  | 0  | 0   | 0  | 2  | 0  |
| <b>GroEL</b>            | 81% identity to GroEL protein (Chaperonin)<br>(Protein Cpn60) [GroL] [ <i>Candidatus</i><br><i>Pelagibacter ubique</i> HTCC1062]  | Alphaproteobacteria<br>(SAR11 cluster)                                | 0  | 0  | 2  | 1  | 0   | 0  | 10 | 3  |
| <b>GroEL</b>            | 73% identity to GroEL protein (Chaperonin)<br>(Protein Cpn60) [GroL] [ <i>Candidatus</i><br><i>Pelagibacter ubique</i> HTCC1062]  | Alphaproteobacteria<br>(SAR11 cluster)                                | 0  | 0  | 3  | 5  | 0   | 0  | 6  | 10 |
| <b>GroEL</b>            | 100% identity to GroEL protein (Chaperonin)<br>(Protein Cpn60) [GroL] [ <i>Ruegeria pomeroyi</i><br>DSS-3]                        | Alphaproteobacteria<br>(Rhodobacterales,<br><i>Roseobacter</i> clade) | 15 | 14 | 0  | 0  | 120 | 91 | 0  | 0  |
| <b>GroEL</b>            | 100% identity to GroEL protein (Chaperonin)<br>(Protein Cpn60) [GroL] [Rhodobacterales<br>bacterium HTCC2150]                     | Alphaproteobacteria<br>(Rhodobacterales,<br><i>Roseobacter</i> clade) | 3  | 4  | 0  | 0  | 14  | 20 | 0  | 0  |
| <b>GroEL</b>            | 100% identity to GroEL protein (Chaperonin)<br>(Protein Cpn60) [GroL] [ <i>Rhodobacter</i><br><i>sphaeroides</i> ATCC 17029]      | Alphaproteobacteria<br>(Rhodobacterales)                              | 0  | 3  | 0  | 0  | 0   | 17 | 0  | 0  |
| <b>GroEL</b>            | 100% identity to GroEL protein (Chaperonin)<br>(Protein Cpn60) [GroL] [ <i>Roseovarius</i><br><i>nubinihibens</i> ISM]            | Alphaproteobacteria<br>(Rhodobacterales,<br><i>Roseobacter</i> clade) | 1  | 2  | 0  | 0  | 17  | 16 | 0  | 0  |
| <b>GroEL</b>            | 100% identity to GroEL protein (Chaperonin)<br>(Protein Cpn60) [GroL] [ <i>Oceanicola granulosus</i><br>HTCC2516]                 | Alphaproteobacteria<br>(Rhodobacterales,<br><i>Roseobacter</i> clade) | 2  | 3  | 0  | 0  | 8   | 9  | 0  | 0  |
| <b>GroEL</b>            | 100% identity to GroEL protein (Chaperonin)<br>(Protein Cpn60) [GroL] [ <i>Oceanicaulis alexandrii</i><br>HTCC2633]               | Alphaproteobacteria<br>(Rhodobacterales)                              | 2  | 2  | 0  | 0  | 5   | 13 | 0  | 0  |
| <b>GroEL</b>            | 100% identity to GroEL protein (Chaperonin)<br>(Protein Cpn60) [GroL] [Rhodobacterales                                            | Alphaproteobacteria<br>(Rhodobacterales,                              | 5  | 0  | 0  | 0  | 21  | 0  | 0  | 0  |



|       |                                                                                                                                                     |                                                                 |    |   |   |   |    |    |   |   |  |
|-------|-----------------------------------------------------------------------------------------------------------------------------------------------------|-----------------------------------------------------------------|----|---|---|---|----|----|---|---|--|
|       | bacterium HTCC2255]                                                                                                                                 | Roseobacter clade)                                              |    |   |   |   |    |    |   |   |  |
| GroEL | 100% identity to GroEL protein (Chaperonin) (Protein Cpn60) [GroL] [ <i>Ruegeria</i> sp. R11]                                                       | Alphaproteobacteria (Rhodobacterales, <i>Roseobacter</i> clade) | 2  | 3 | 0 | 0 | 11 | 6  | 0 | 0 |  |
| GroEL | 100% identity to GroEL protein (Chaperonin) (Protein Cpn60) [GroL] [ <i>Loktanelia vestfoldensis</i> SKA53]                                         | Alphaproteobacteria (Rhodobacterales, <i>Roseobacter</i> clade) | 2  | 1 | 0 | 0 | 6  | 6  | 0 | 0 |  |
| GroEL | 90% identity to GroEL protein (Chaperonin) (Protein Cpn60) [GroL] [ <i>Roseobacter litoralis</i> Och 149]                                           | Alphaproteobacteria (Rhodobacterales, <i>Roseobacter</i> clade) | 0  | 0 | 1 | 2 | 0  | 0  | 5 | 6 |  |
| GroEL | 100% identity to GroEL protein (Chaperonin) (Protein Cpn60) [GroL] [Rhodobacterales bacterium HTCC2083]                                             | Alphaproteobacteria (Rhodobacterales, <i>Roseobacter</i> clade) | 2  | 2 | 0 | 0 | 4  | 7  | 0 | 0 |  |
| GroEL | 100% identity to GroEL protein (Chaperonin) (Protein Cpn60) [GroL] [ <i>Sphingopyxis alaskensis</i> RB2256]                                         | Alphaproteobacteria (Sphingomonadales)                          | 10 | 2 | 0 | 0 | 40 | 13 | 0 | 0 |  |
| GroEL | 100% identity to GroEL protein (Chaperonin) (Protein Cpn60) [GroL] [ <i>Magnetococcus</i> sp. (strain MC-1)]                                        | Alphaproteobacteria (unclassified)                              | 3  | 4 | 0 | 0 | 7  | 31 | 0 | 0 |  |
| GroEL | 100% identity to GroEL protein (Chaperonin) (Protein Cpn60) [GroL] [ <i>Gluconacetobacter diazotrophicus</i> PAI 5]                                 | Alphaproteobacteria (Rhodospirillales)                          | 0  | 2 | 0 | 0 | 0  | 7  | 0 | 0 |  |
| GroEL | 88% identity to GroEL protein (Chaperonin) (Protein Cpn60) [GroL] [ <i>Magnetospirillum magneticum</i> (strain AMB-1 / ATCC 700264)]                | Alphaproteobacteria (Rhodospirillales)                          | 1  | 3 | 0 | 0 | 4  | 7  | 0 | 0 |  |
| GroEL | 100% identity to GroEL protein (Chaperonin) (Protein Cpn60) [GroL] [ <i>Parvularcula bermudensis</i> (strain ATCC BAA-594 / HTCC2503 / KCTC 12087)] | Alphaproteobacteria (Parvularcales)                             | 1  | 2 | 0 | 0 | 4  | 17 | 0 | 0 |  |
| GroEL | 100% identity to GroEL protein (Chaperonin) (Protein Cpn60) [GroL] [ <i>Rhizobium loti</i> ( <i>Mesorhizobium loti</i> )]                           | Alphaproteobacteria (Rhizobiales)                               | 1  | 2 | 0 | 0 | 4  | 28 | 0 | 0 |  |
| GroEL | 100% identity to GroEL protein (Chaperonin) (Protein Cpn60) [GroL] [ <i>Azorhizobium caulinodans</i> ORS 571]                                       | Alphaproteobacteria (Rhizobiales)                               | 2  | 1 | 0 | 0 | 5  | 24 | 0 | 0 |  |
| GroEL | 100% identity to GroEL protein (Chaperonin) (Protein Cpn60) [GroL] [ <i>Mesorhizobium</i> sp. BNC1]                                                 | Alphaproteobacteria (Rhizobiales)                               | 2  | 1 | 0 | 0 | 10 | 1  | 0 | 0 |  |
| GroEL | 100% identity to GroEL protein (Chaperonin) (Protein Cpn60) [GroL] [ <i>Aurantimonas manganoxydans</i> SI85-9A1]                                    | Alphaproteobacteria (Rhizobiales)                               | 1  | 2 | 0 | 0 | 4  | 2  | 0 | 0 |  |
| GroEL | 100% identity to GroEL protein (Chaperonin) (Protein Cpn60) [GroL] [ <i>Ochrobactrum thiophenivorans</i> ]                                          | Alphaproteobacteria (Rhizobiales)                               | 2  | 0 | 0 | 0 | 2  | 0  | 0 | 0 |  |
| GroEL | 100% identity to GroEL protein (Chaperonin) (Protein Cpn60) [GroL] [ <i>Salmonella enterica</i> subsp. <i>enterica</i> serovar Newport str. SL254]  | Gammaaproteobacteria (Enterobacteriales)                        | 4  | 3 | 0 | 0 | 14 | 31 | 0 | 0 |  |

|       |                                                                                                                                       |                                            |   |   |    |    |    |    |     |    |
|-------|---------------------------------------------------------------------------------------------------------------------------------------|--------------------------------------------|---|---|----|----|----|----|-----|----|
| GroEL | 100% identity to GroEL protein (Chaperonin) (Protein Cpn60) [GroL] [ <i>Escherichia coli</i> 536] ( <i>likely contaminant</i> )       | Gammaproteobacteria (Enterobacteriales)    | 2 | 4 | 0  | 0  | 6  | 5  | 0   | 0  |
| GroEL | 100% identity to GroEL protein (Chaperonin) (Protein Cpn60) [GroL] [ <i>Pseudomonas aeruginosa</i> ]                                  | Gammaproteobacteria (Pseudomonadales)      | 0 | 0 | 21 | 11 | 0  | 0  | 116 | 28 |
| GroEL | 73% identity to GroEL protein (Chaperonin) (Protein Cpn60) [GroL] [ <i>Pseudomonas putida</i> (strain GB-1)]                          | Gammaproteobacteria (Pseudomonadales)      | 0 | 0 | 4  | 2  | 0  | 0  | 16  | 7  |
| GroEL | 70% identity to GroEL protein (Chaperonin) (Protein Cpn60) [GroL] [ <i>Cellvibrio japonicus</i> (strain Ueda107)]                     | Gammaproteobacteria (Pseudomonadales)      | 0 | 0 | 3  | 0  | 0  | 0  | 7   | 0  |
| GroEL | 79% identity to GroEL protein (Chaperonin) (Protein Cpn60) [GroL] [ <i>Candidatus Ruthia magnifica</i> ]                              | Gammaproteobacteria (GSO-EOSA-1)           | 0 | 0 | 10 | 15 | 0  | 0  | 23  | 58 |
| GroEL | 100% identity to GroEL protein (Chaperonin) (Protein Cpn60) [GroL] [marine gamma proteobacterium HTCC2207]                            | Gammaproteobacteria (OMG)                  | 1 | 2 | 0  | 0  | 8  | 11 | 0   | 0  |
| GroEL | 87% identity to GroEL protein (Chaperonin) (Protein Cpn60) [GroL] [gamma proteobacterium HTCC2207]                                    | Gammaproteobacteria (OMG)                  | 0 | 0 | 3  | 1  | 0  | 0  | 8   | 1  |
| GroEL | 87% identity to GroEL protein (Chaperonin) (Protein Cpn60) [GroL][ <i>Helicobacter pullorum</i> MIT 98-5489]                          | Epsilonproteobacteria (Campylobacteriales) | 2 | 0 | 0  | 0  | 2  | 0  | 0   | 0  |
| GroEL | 71% identity to GroEL protein (Chaperonin) (Protein Cpn60) [GroL] [ <i>Candidatus Nitrospira defluvii</i> ]                           | Nitrospirae                                | 0 | 0 | 0  | 10 | 0  | 0  | 0   | 42 |
| GroEL | 80% identity to GroEL protein (Chaperonin) (Protein Cpn60) [GroL] [ <i>Dokdonia donghaensis</i> MED134]                               | Bacteroidetes (Flavobacteria)              | 0 | 0 | 10 | 1  | 0  | 0  | 31  | 5  |
| GroEL | 100% identity to GroEL protein (Chaperonin) (Protein Cpn60) [ <i>Cytophaga hutchinsonii</i> ATCC 33406]                               | Bacteroidetes (Flavobacteria)              | 0 | 2 | 0  | 0  | 0  | 3  | 0   | 0  |
| GroEL | 76% identity to GroEL protein (Chaperonin) (Protein Cpn60) [GroL] [ <i>Polaribacter</i> sp. MED152]                                   | Bacteroidetes (Flavobacteria)              | 0 | 0 | 2  | 0  | 0  | 0  | 4   | 0  |
| GroEL | 100% identity to GroEL protein (Chaperonin) (Protein Cpn60) [GroL] [ <i>Nitrospira multiformis</i> (strain ATCC 25196 / NCIMB 11849)] | Betaproteobacteria (Nitrosomonadales)      | 3 | 3 | 0  | 0  | 6  | 26 | 0   | 0  |
| GroEL | 100% identity to GroEL protein (Chaperonin) (Protein Cpn60) [GroL] [ <i>Aromatoleum aromaticum</i> EbN1]                              | Betaproteobacteria (Rhodocyclales)         | 2 | 2 | 0  | 0  | 5  | 28 | 0   | 0  |
| GroEL | 100% identity to GroEL protein (Chaperonin) (Protein Cpn60) [GroL] [ <i>Oxalobacter formigenes</i> HOxBLS]                            | Betaproteobacteria (Burkholderiales)       | 2 | 1 | 0  | 0  | 14 | 24 | 0   | 0  |

|                                             |                                                                                                                                             |                                                                 |   |   |   |    |   |    |    |    |
|---------------------------------------------|---------------------------------------------------------------------------------------------------------------------------------------------|-----------------------------------------------------------------|---|---|---|----|---|----|----|----|
| <b>GroEL</b>                                | 100% identity to GroEL protein (Chaperonin) (Protein Cpn60) [GroL] [ <i>Haliangium ochraceum</i> DSM 14365]                                 | Deltaproteobacteria (Myxococcales)                              | 1 | 3 | 0 | 0  | 4 | 67 | 0  | 0  |
| <b>GroEL</b>                                | 100% identity to GroEL protein (Chaperonin) (Protein Cpn60) [GroL] [ <i>Campylobacter concisus</i> 13826]                                   | Epsilonproteobacteria (Campylobacteriales)                      | 2 | 0 | 0 | 0  | 3 | 0  | 0  | 0  |
| <b>GroEL</b>                                | 95% identity to GroEL protein (Chaperonin) (Protein Cpn60) [GroL] [uncultured marine microorganism HF4000 ANIW137115]                       | Bacteria? (unclassified)                                        | 1 | 3 | 0 | 0  | 1 | 5  | 0  | 0  |
|                                             |                                                                                                                                             |                                                                 |   |   |   |    |   |    |    |    |
| <b>GroES chaperonin</b>                     |                                                                                                                                             |                                                                 |   |   |   |    |   |    |    |    |
| <b>GroES</b>                                | 100% identity to GroES protein (Chaperonin) (Protein Cpn10) [GroS] [ <i>Candidatus Pelagibacter ubique</i> HTCC1002]                        | Alphaproteobacteria (SAR11 cluster)                             | 0 | 0 | 3 | 0  | 0 | 0  | 7  | 0  |
| <b>GroES</b>                                | 74% identity to GroES protein (Chaperonin) (Protein Cpn10) [GroS] [ <i>Oceanospirillum</i> sp. MED92]                                       | Gammaproteobacteria (Oceanospirillales)                         | 0 | 0 | 4 | 1  | 0 | 0  | 11 | 1  |
|                                             |                                                                                                                                             |                                                                 |   |   |   |    |   |    |    |    |
| <b>Hsp90 / HtpG (Heat shock protein 90)</b> |                                                                                                                                             |                                                                 |   |   |   |    |   |    |    |    |
| <b>Hsp90</b>                                | 71% identity to Chaperone protein HtpG / Heat shock protein Hsp90 [ <i>Candidatus Ruthia magnifica</i> ]                                    | Gammaproteobacteria (GSO-EOSA-1)                                | 0 | 0 | 0 | 6  | 0 | 0  | 0  | 11 |
| <b>Hsp90</b>                                | 100% identity to Chaperone protein HtpG / Heat shock protein Hsp90 [Rhodobacterales bacterium HTCC2255]                                     | Alphaproteobacteria (Rhodobacterales, <i>Roseobacter</i> clade) | 2 | 0 | 0 | 0  | 2 | 0  | 0  | 0  |
| <b>Hsp90</b>                                | 68% identity to Chaperone protein HtpG / Heat shock protein Hsp90 [ <i>Saccharophagus degradans</i> (strain 2-40 / ATCC 43961 / DSM 17024)] | Gammaproteobacteria (Alteromonadales)                           | 0 | 0 | 2 | 1  | 0 | 0  | 5  | 1  |
|                                             |                                                                                                                                             |                                                                 |   |   |   |    |   |    |    |    |
| <b>Cpn60 (Thermosome)</b>                   |                                                                                                                                             |                                                                 |   |   |   |    |   |    |    |    |
| <b>Cpn60</b>                                | 82% identity to Thermosome/Cpn60 [Nmar_1577] [ <i>Nitrosopumilus maritimus</i> (strain SCM1)]                                               | Marine Group I Crenarchaeota (Nitrosopumilales)                 | 0 | 0 | 0 | 15 | 0 | 0  | 0  | 69 |
| <b>Cpn60</b>                                | 86% identity to Thermosome/Cpn60 [Nmar_1792] [ <i>Nitrosopumilus maritimus</i> (strain SCM1)]                                               | Marine Group I Crenarchaeota (Nitrosopumilales)                 | 0 | 0 | 0 | 5  | 0 | 0  | 0  | 16 |
| <b>Cpn60</b>                                | 100% identity to Thermosome/Cpn60 [Nmar_1792] [ <i>Nitrosopumilus maritimus</i> (strain SCM1)]                                              | Marine Group I Crenarchaeota (Nitrosopumilales)                 | 0 | 0 | 0 | 12 | 0 | 0  | 0  | 52 |
| <b>Cpn60</b>                                | 100% identity to Thermosome/Cpn60 [Nmar_1577] [ <i>Nitrosopumilus maritimus</i> (strain SCM1)]                                              | Marine Group I Crenarchaeota (Nitrosopumilales)                 | 0 | 0 | 0 | 4  | 0 | 0  | 0  | 8  |

|                                                        |                                                                                                                                       |                                                 |   |   |   |    |   |   |   |     |
|--------------------------------------------------------|---------------------------------------------------------------------------------------------------------------------------------------|-------------------------------------------------|---|---|---|----|---|---|---|-----|
| <b>Cpn60</b>                                           | 94% identity to Thermosome/Cpn60 [Nmar_1577] [ <i>Nitrosopumilus maritimus</i> (strain SCM1)]                                         | Marine Group I Crenarchaeota (Nitrosopumilales) | 0 | 0 | 0 | 3  | 0 | 0 | 0 | 7   |
| <b>AAA family ATPase</b>                               |                                                                                                                                       |                                                 |   |   |   |    |   |   |   |     |
| <b>AAA family ATPase</b>                               | 100% identity to AAA ATPase (MoxR-like) [marine gamma proteobacterium HTCC2080]                                                       | Gamma proteobacteria (unclassified)             | 1 | 0 | 1 | 2  | 4 | 0 | 4 | 3   |
| <b>AAA family ATPase</b>                               | 100% identity to ATPase AAA-2 / ClpB chaperone [ <i>Sphingopyxis alaskensis</i> RB2256]                                               | Alphaproteobacteria (Sphingomonadales)          | 3 | 0 | 0 | 0  | 3 | 0 | 0 | 0   |
| <b>AAA family ATPase</b>                               | 89% identity to AAA family ATPase, CDC48 subfamily [Nmar_0101] [ <i>Nitrosopumilus maritimus</i> (strain SCM1)]                       | Marine Group I Crenarchaeota (Nitrosopumilales) | 0 | 0 | 0 | 26 | 0 | 0 | 0 | 117 |
| <b>ATPase AAA-2</b>                                    | 100% identity to ATPase AAA-2 [ <i>Trichodesmium erythraeum</i> (strain IMS101)]                                                      | Cyanobacteria                                   | 2 | 0 | 0 | 0  | 2 | 0 | 0 | 0   |
| <b>RubisCO, post-translational activation</b>          |                                                                                                                                       |                                                 |   |   |   |    |   |   |   |     |
| <b>CbbQ/NirQ/NorQ family protein: ATPase chaperone</b> | 30% identity to CbbQ-1 protein [ <i>Thiomicrospira crunogena</i> (strain XCL-2)]                                                      | Gamma proteobacteria (Thiotrichales)            | 0 | 0 | 0 | 5  | 0 | 0 | 0 | 21  |
| <b>PROTEOLYSIS</b>                                     |                                                                                                                                       |                                                 |   |   |   |    |   |   |   |     |
| <b>Proteasome complex (EC 3.4.25.1)</b>                |                                                                                                                                       |                                                 |   |   |   |    |   |   |   |     |
| <b>Proteasome, alpha subunit</b>                       | 100% identity to Proteasome endopeptidase complex, alpha subunit [PsmA] [Nmar_1314] [ <i>Nitrosopumilus maritimus</i> (strain SCM1)]  | Marine Group I Crenarchaeota (Nitrosopumilales) | 0 | 0 | 0 | 3  | 0 | 0 | 0 | 6   |
| <b>Proteasome, alpha subunit</b>                       | 82% identity to Proteasome endopeptidase complex, alpha subunit [PsmA] [Nmar_1314] [ <i>Nitrosopumilus maritimus</i> (strain SCM1)]   | Marine Group I Crenarchaeota (Nitrosopumilales) | 0 | 0 | 0 | 2  | 0 | 0 | 0 | 3   |
| <b>Proteasome, alpha subunit</b>                       | 83% identity to Proteasome endopeptidase complex, alpha subunit [PsmA] [Nmar_0811] [ <i>Nitrosopumilus maritimus</i> (strain SCM1)]   | Marine Group I Crenarchaeota (Nitrosopumilales) | 0 | 0 | 0 | 2  | 0 | 0 | 0 | 3   |
| <b>Proteasome, beta subunit</b>                        | 85% identity to Proteasome endopeptidase complex, beta 1 subunit [PsmB1] [Nmar_0694] [ <i>Nitrosopumilus maritimus</i> (strain SCM1)] | Marine Group I Crenarchaeota (Nitrosopumilales) | 0 | 0 | 0 | 2  | 0 | 0 | 0 | 3   |
| <b>Leucyl aminopeptidase (EC 3.4.11.1)</b>             |                                                                                                                                       |                                                 |   |   |   |    |   |   |   |     |
| <b>Leucyl aminopeptidase</b>                           | 100% identity to Leucyl aminopeptidase [PepA] [ <i>Candidatus Pelagibacter ubique</i> HTCC1062]                                       | Alphaproteobacteria (SAR11 cluster)             | 4 | 3 | 0 | 0  | 7 | 7 | 0 | 0   |
| <b>Leucyl aminopeptidase</b>                           | 70% identity to Leucyl aminopeptidase [PepA] [ <i>Neptuniibacter caesariensis</i> ]                                                   | Gamma proteobacteria (Oceanospirillales)        | 0 | 0 | 2 | 0  | 0 | 0 | 3 | 0   |











| <b>Other hypothetical proteins</b>                      |                                                                                                                                      |                                                 |   |   |   |   |   |   |   |   |
|---------------------------------------------------------|--------------------------------------------------------------------------------------------------------------------------------------|-------------------------------------------------|---|---|---|---|---|---|---|---|
| <b>Hypothetical protein (no signal peptide)</b>         | 88% identity to Putative uncharacterized protein [Candidatus Pelagibacter ubique HTCC1002]                                           | Alphaproteobacteria (SAR11 cluster)             | 2 | 1 | 0 | 0 | 3 | 1 | 0 | 0 |
| <b>Hypothetical protein (signal peptide)</b>            | 52% identity to Putative uncharacterized protein [Rmag_0260] [Candidatus Ruthia magnifica]                                           | Gammaproteobacteria (GSO-EOSA-1)                | 0 | 0 | 0 | 2 | 0 | 0 | 0 | 6 |
| <b>Hypothetical protein (signal peptide)</b>            | 48% identity to Putative uncharacterized protein [Rmag_0260] [Candidatus Ruthia magnifica]                                           | Gammaproteobacteria (GSO-EOSA-1)                | 0 | 0 | 0 | 2 | 0 | 0 | 0 | 5 |
| <b>Hypothetical protein (signal peptide)</b>            | 42% identity to Putative uncharacterized protein [Gluconacetobacter diazotrophicus (strain ATCC 49037 / DSM 5601 / PA15)]            | Alphaproteobacteria (Rhodospirillales)          | 0 | 0 | 0 | 3 | 0 | 0 | 0 | 6 |
| <b>Hypothetical protein (signal peptide)</b>            | 100% identity to Putative uncharacterized protein [Alteromonadales bacterium TW-7]                                                   | Gammaproteobacteria (Alteromonadales)           | 2 | 0 | 0 | 0 | 3 | 0 | 0 | 0 |
| <b>Hypothetical protein (no signal peptide)</b>         | 100% identity to Putative uncharacterized protein [Moritella sp. PE36]                                                               | Gammaproteobacteria (Alteromonadales)           | 2 | 0 | 0 | 0 | 2 | 0 | 0 | 0 |
| <b>Hypothetical protein (no signal peptide)</b>         | 38% identity to Putative uncharacterized protein [Prochlorococcus marinus (strain NATL2A)]                                           | Cyanobacteria                                   | 0 | 0 | 2 | 0 | 0 | 0 | 2 | 0 |
| <b>Hypothetical protein (signal peptide; protease?)</b> | 77% identity to Putative uncharacterized protein [Flavobacteria bacterium MS024-2A]                                                  | Bacteroidetes (Flavobacteria)                   | 0 | 0 | 2 | 0 | 0 | 0 | 2 | 0 |
| <b>Hypothetical protein (signal peptide)</b>            | 75% identity to Putative uncharacterized protein [uncultured marine bacterium EB0_35D03]                                             | Bacteria (unclassified)                         | 0 | 0 | 1 | 2 | 0 | 0 | 1 | 3 |
| <b>Hypothetical protein (signal peptide)</b>            | 25% identity to Putative uncharacterized protein [Candidatus Puniceispirillum marinum (strain IMCC1322)]                             | Alphaproteobacteria (SAR116 cluster)            | 0 | 0 | 3 | 0 | 0 | 0 | 7 | 0 |
| <b>Hypothetical protein (signal peptide; adhesin?)</b>  | 44% identity to Putative uncharacterized protein (collagen triple helix repeat) [Nmar_0682] [Nitrosopumilus maritimus (strain SCM1)] | Marine Group I Crenarchaeota (Nitrosopumilales) | 0 | 0 | 0 | 2 | 0 | 0 | 0 | 5 |
| <b>Hypothetical protein (signal peptide)</b>            | 77% identity to Putative uncharacterized protein: possible protease [Nmar_1648] [Nitrosopumilus maritimus (strain SCM1)]             | Marine Group I Crenarchaeota (Nitrosopumilales) | 0 | 0 | 0 | 2 | 0 | 0 | 0 | 2 |
| <b>Hypothetical protein (no signal peptide)</b>         | 86% identity to Putative uncharacterized protein [Nmar_1538] [Nitrosopumilus maritimus (strain SCM1)]                                | Marine Group I Crenarchaeota (Nitrosopumilales) | 0 | 0 | 0 | 2 | 0 | 0 | 0 | 3 |
| <b>Hypothetical protein (no signal peptide)</b>         | 90% identity to Putative uncharacterized protein [Nmar_1398] [Nitrosopumilus maritimus (strain SCM1)]                                | Marine Group I Crenarchaeota (Nitrosopumilales) | 0 | 0 | 0 | 2 | 0 | 0 | 0 | 3 |
| <b>Hypothetical protein (no signal peptide)</b>         | 80% identity to Putative uncharacterized protein [Nmar_0700] [Nitrosopumilus maritimus (strain SCM1)]                                | Marine Group I Crenarchaeota (Nitrosopumilales) | 0 | 0 | 0 | 2 | 0 | 0 | 0 | 2 |
| <b>Hypothetical protein (signal peptide)</b>            | 62% identity to Putative uncharacterized protein [Nmar_1199] [Nitrosopumilus maritimus (strain SCM1)]                                | Marine Group I Crenarchaeota (Nitrosopumilales) | 0 | 0 | 0 | 3 | 0 | 0 | 0 | 5 |
| <b>Hypothetical protein (signal peptide)</b>            | 52% identity to Putative uncharacterized protein [Nmar_0627] [Nitrosopumilus maritimus (strain SCM1)]                                | Marine Group I Crenarchaeota (Nitrosopumilales) | 0 | 0 | 0 | 2 | 0 | 0 | 0 | 3 |

|                                                                      |                                                                                                                                     |                                                 |   |   |   |   |    |    |   |    |
|----------------------------------------------------------------------|-------------------------------------------------------------------------------------------------------------------------------------|-------------------------------------------------|---|---|---|---|----|----|---|----|
| <b>Hypothetical protein (signal peptide)</b>                         | 62% identity to Putative uncharacterized protein [Nmar_0627] [ <i>Nitrosopumilus maritimus</i> (strain SCM1)]                       | Marine Group I Crenarchaeota (Nitrosopumilales) | 0 | 0 | 0 | 2 | 0  | 0  | 0 | 8  |
| <b>Hypothetical protein (no signal peptide)</b>                      | 91% identity to Putative uncharacterized protein [Nmar_1599] [ <i>Nitrosopumilus maritimus</i> (strain SCM1)]                       | Marine Group I Crenarchaeota (Nitrosopumilales) | 0 | 0 | 0 | 2 | 0  | 0  | 0 | 3  |
| <b>Hypothetical protein (signal peptide)</b>                         | 37% identity to Putative uncharacterized protein [Nmar_1547] [ <i>Nitrosopumilus maritimus</i> (strain SCM1)]                       | Marine Group I Crenarchaeota (Nitrosopumilales) | 0 | 0 | 0 | 2 | 0  | 0  | 0 | 17 |
| <b>Hypothetical protein (no signal peptide)</b>                      | 81% identity to Putative uncharacterized protein [Nmar_1469] [ <i>Nitrosopumilus maritimus</i> (strain SCM1)]                       | Marine Group I Crenarchaeota (Nitrosopumilales) | 0 | 0 | 0 | 2 | 0  | 0  | 0 | 2  |
| <b>Hypothetical protein (no signal peptide)</b>                      | 66% identity to Putative uncharacterized protein [Nmar_0209] [ <i>Nitrosopumilus maritimus</i> (strain SCM1)]                       | Marine Group I Crenarchaeota (Nitrosopumilales) | 0 | 0 | 0 | 3 | 0  | 0  | 0 | 5  |
| <b>Hypothetical protein (no signal peptide)</b>                      | 90% identity to Putative uncharacterized protein [Nmar_0269] [ <i>Nitrosopumilus maritimus</i> (strain SCM1)]                       | Marine Group I Crenarchaeota (Nitrosopumilales) | 0 | 0 | 0 | 2 | 0  | 0  | 0 | 3  |
| <b>Hypothetical protein (no signal peptide)</b>                      | 66% identity to Putative uncharacterized protein [Nmar_1396] [ <i>Nitrosopumilus maritimus</i> (strain SCM1)]                       | Marine Group I Crenarchaeota (Nitrosopumilales) | 0 | 0 | 0 | 2 | 0  | 0  | 0 | 3  |
| <b>Hypothetical protein (no signal peptide)</b>                      | 87% identity to Putative uncharacterized protein [Nmar_0067] [ <i>Nitrosopumilus maritimus</i> (strain SCM1)]                       | Marine Group I Crenarchaeota (Nitrosopumilales) | 0 | 0 | 0 | 3 | 0  | 0  | 0 | 5  |
| <b>Hypothetical protein (no signal peptide; coiled-coil protein)</b> | 86% identity to Putative uncharacterized protein / coiled-coil protein [Nmar_1038] [ <i>Nitrosopumilus maritimus</i> (strain SCM1)] | Marine Group I Crenarchaeota (Nitrosopumilales) | 0 | 5 | 0 | 0 | 0  | 8  | 0 | 0  |
| <b>Hypothetical protein (signal peptide)</b>                         | 100% identity to S-layer-related protein [ <i>Methanococcoides burtonii</i> DSM 6242]                                               | Euryarchaeota (Methanosarcinales)               | 0 | 5 | 0 | 0 | 0  | 18 | 0 | 0  |
|                                                                      |                                                                                                                                     |                                                 |   |   |   |   |    |    |   |    |
|                                                                      |                                                                                                                                     |                                                 |   |   |   |   |    |    |   |    |
| <b>EUKARYOTE PROTEINS</b>                                            |                                                                                                                                     |                                                 |   |   |   |   |    |    |   |    |
| <b>Photosystem proteins</b>                                          |                                                                                                                                     |                                                 |   |   |   |   |    |    |   |    |
| <b>Photosystem II reaction center protein D1</b>                     | 100% identity to photosystem II reaction center protein D1 [ <i>Flintiella sanguinaria</i> ]                                        | Rhodophyta (red alga)                           | 3 | 0 | 0 | 0 | 18 | 0  | 0 | 0  |
| <b>Photosystem I subunit VII</b>                                     | 100% identity to photosystem I subunit VII [ <i>Guillardia theta</i> ]                                                              | Cryptophyta                                     | 2 | 0 | 0 | 0 | 3  | 0  | 0 | 0  |
| <b>Photosystem II 44 kDa protein</b>                                 | 100% identity to photosystem II 44 kDa protein [ <i>Emiliana huxleyi</i> ]                                                          | Haptophyta (coccolithophore)                    | 4 | 1 | 0 | 0 | 31 | 1  | 0 | 0  |
| <b>Photosystem II protein D2</b>                                     | 100% identity to photosystem II protein D2 [ <i>Emiliana huxleyi</i> ]                                                              | Haptophyta (coccolithophore)                    | 2 | 1 | 0 | 0 | 18 | 1  | 0 | 0  |
| <b>Photosystem II cytochrome c550</b>                                | 82% identity to Cytochrome c-550 [PsbV] [ <i>Emiliana huxleyi</i> ]                                                                 | Haptophyta (coccolithophore)                    | 0 | 0 | 2 | 0 | 0  | 0  | 3 | 0  |





|                                                |                                                                                                               |                               |   |   |   |   |   |   |   |    |
|------------------------------------------------|---------------------------------------------------------------------------------------------------------------|-------------------------------|---|---|---|---|---|---|---|----|
| <b>Rubber elongation factor</b>                |                                                                                                               |                               |   |   |   |   |   |   |   |    |
| <b>Rubber elongation factor</b>                | 100% identity to Elongation factor protein [ <i>Hevea brasiliensis</i> ] (likely contaminant – latex gloves?) | Tracheophyta                  | 2 | 2 | 0 | 0 | 2 | 7 | 0 | 0  |
|                                                |                                                                                                               |                               |   |   |   |   |   |   |   |    |
| <b>Hypothetical proteins</b>                   |                                                                                                               |                               |   |   |   |   |   |   |   |    |
| <b>TPR-repeat protein</b>                      | 50% identity to Tetratricopeptide repeat protein [ <i>Ectocarpus siliculosus</i> ]                            | Heterokontophyta (brown alga) | 0 | 0 | 3 | 0 | 0 | 0 | 8 | 0  |
| <b>Hypothetical protein</b>                    | 100% identity to Hypothetical protein [ <i>Vitis vinifera</i> ] (likely contaminant)                          | Tracheophyta                  | 3 | 0 | 0 | 0 | 3 | 0 | 0 | 0  |
|                                                |                                                                                                               |                               |   |   |   |   |   |   |   |    |
|                                                |                                                                                                               |                               |   |   |   |   |   |   |   |    |
| <b>PHAGE PROTEINS</b>                          |                                                                                                               |                               |   |   |   |   |   |   |   |    |
| <b>Capsid protein Gp23, major head subunit</b> | 65% identity to Capsid protein Gp23, major head subunit [ <i>Synechococcus</i> phage S-SSM7]                  |                               | 0 | 0 | 2 | 9 | 0 | 0 | 4 | 28 |
| <b>Major capsid protein</b>                    | 100% identity to Major capsid protein (MCP) [ <i>Phaeocystis pouchetii</i> virus (PpV01)]                     |                               | 4 | 1 | 0 | 0 | 8 | 3 | 0 | 0  |
| <b>Tail sheath monomer</b>                     | 40% identity to Tail sheath monomer [Gp18] [ <i>Prochlorococcus</i> phage Syn33]                              |                               | 0 | 0 | 0 | 7 | 0 | 0 | 0 | 17 |
| <b>Capsid protein Gp23, major head subunit</b> | 66% identity to Capsid protein Gp23, major head subunit [ <i>Synechococcus</i> phage S-SM2]                   |                               | 0 | 0 | 1 | 4 | 0 | 0 | 1 | 11 |
| <b>Capsid protein Gp23, major head subunit</b> | 67% identity to Capsid protein Gp23, major head subunit [uncultured Myoviridae]                               |                               | 0 | 0 | 1 | 2 | 0 | 0 | 3 | 3  |
| <b>Capsid protein Gp23, major head subunit</b> | 61% identity to Capsid protein Gp23, major head subunit [Gp23] [ <i>Synechococcus</i> phage S-SSM7]           |                               | 0 | 0 | 0 | 2 | 0 | 0 | 0 | 3  |
| <b>Capsid protein Gp27</b>                     | 39% identity to Capsid protein Gp27 [ <i>Streptomyces</i> phage phiSASD1]                                     |                               | 0 | 0 | 0 | 2 | 0 | 0 | 0 | 3  |

## References

- Alber BE, Kung JW, Fuchs G (2008). 3-Hydroxypropionyl-coenzyme A synthetase from *Metallosphaera sedula*, an enzyme involved in autotrophic CO<sub>2</sub> fixation. *J Bacteriol* **190**: 1383-1389.
- Berg IA, Kockelkorn D, Buckel W, Fuchs G. (2007). A 3-hydroxypropionate/4-hydroxybutyrate autotrophic carbon dioxide assimilation pathway in Archaea. *Science* **318**: 1782-1786.

- Hallam SJ, Konstantinidis KT, Putnam N, Schleper C, Watanabe Y, Sugahara J *et al.* (2006). Genomic analysis of the uncultivated marine crenarchaeote *Cenarchaeum symbiosum*. *Proc Natl Acad Sci U S A* **103**: 18296-18301.
- Kockelkorn D, Fuchs G. (2009) Malonic semialdehyde reductase, succinic semialdehyde reductase, and succinyl-coenzyme A reductase from *Metallosphaera sedula*: enzymes of the autotrophic 3-hydroxypropionate/4-hydroxybutyrate cycle in Sulfolobales. *J Bacteriol* **191**: 6352-6362.
- Ramos-Vera WH, Weiss M, Strittmatter E, Kockelkorn D, Fuchs G. (2011). Identification of missing genes and enzymes for autotrophic carbon fixation in crenarchaeota. *J Bacteriol* **193**: 1201-1211.
- Walker CB, de la Torre JR, Klotz MG, Urakawa H, Pinel N, Arp DJ *et al.* (2010). *Nitrosopumilus maritimus* genome reveals unique mechanisms for nitrification and autotrophy in globally distributed marine crenarchaea. *Proc Natl Acad Sci U S A* **107**: 8818-8823.
